# Supplementary material for: Dynamics of transcriptome changes during subcutaneous preadipocyte differentiation in ducks
Source: PubMed Central journal article supplement (PMC6720933; doi:10.1186/s12864-019-6055-9), 2019-09-02

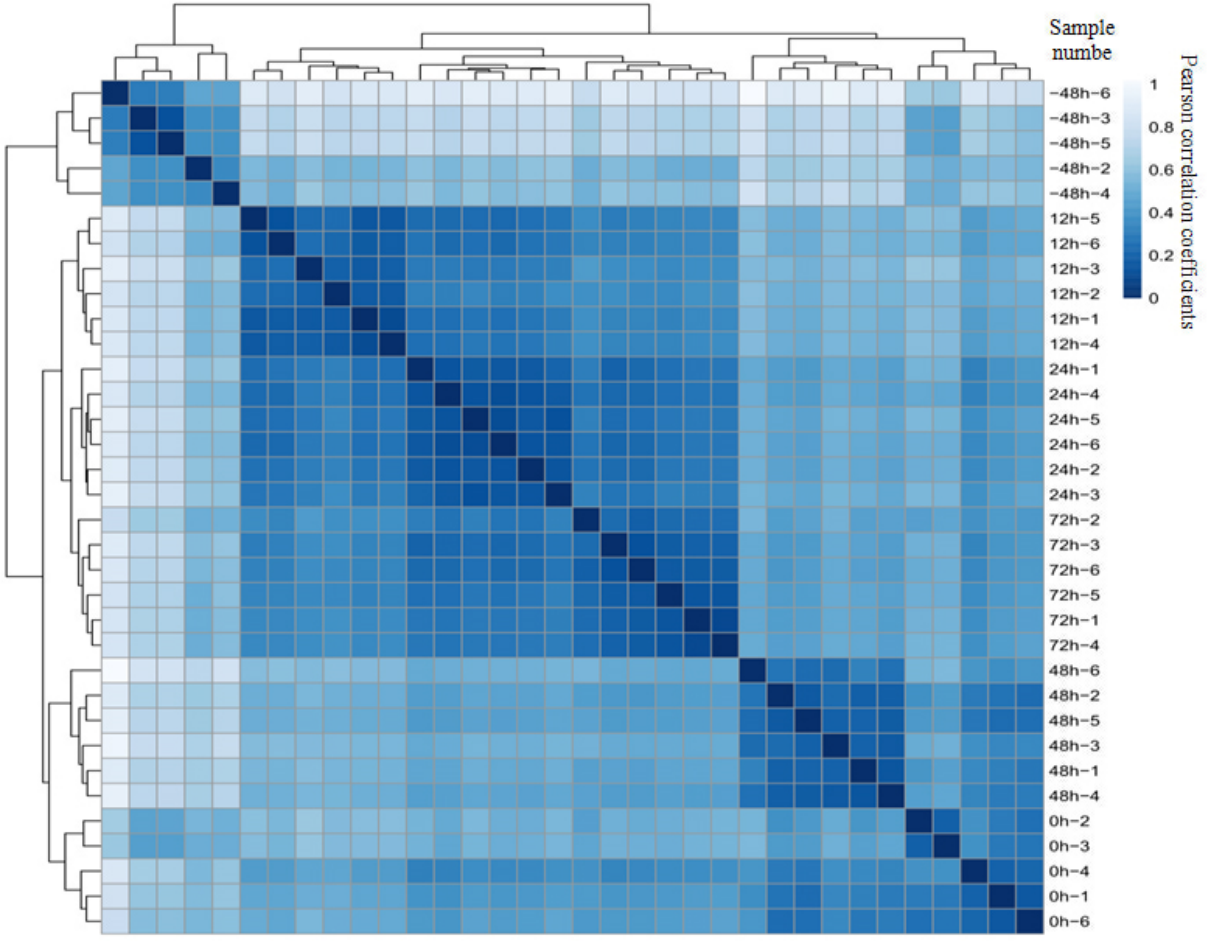

Supplement: 12864_2019_6055_MOESM2_ESM.pdf [file 12864_2019_6055_MOESM2_ESM.pdf]
