# Supplementary material for: Dynamics of transcriptome changes during subcutaneous preadipocyte differentiation in ducks
Source: BMC Genomics. 2019 Sep 2;20:688. doi: 10.1186/s12864-019-6055-9 (PMC6720933; doi:10.1186/s12864-019-6055-9)
Supplement: Supplementary file 14 — Table S10. GO terms and KEGG pathway analysis of selected genes with FPKM >30 and stably expressed during the entire stage. (XLSX 80 kb) [file 12864_2019_6055_MOESM14_ESM.xlsx]

## Sheet: Sheet1 high expressed-GO
GroupID	Category	Term	Description	LogP	Log(q-value)	InTerm_InList	Genes	Symbols
1_Summary	GO Cellular Components	GO:0005925	focal adhesion	-78.9094	-74.5507	121/405	60,70,71,81,118,301,308,309,527,567,682,960,975,977,998,1012,1213,1266,1465,1466,1495,1499,2017,2037,2191,2275,2314,2319,2665,2697,2923,2934,3312,3313,3339,3371,3611,3655,3685,3688,3693,3728,3927,4035,4267,4478,4627,4736,4739,4869,5034,5339,5500,5604,5879,5962,6122,6124,6125,6128,6130,6132,6133,6136,6155,6156,6160,6168,6169,6181,6187,6189,6191,6193,6201,6202,6205,6207,6217,6222,6223,6235,6385,638…	ACTB,ACTC1,ACTG1,ACTN4,ADD1,ANXA1,ANXA5,ANXA6,ATP6V0C,B2M,BSG,CD44,CD81,CD151,CDC42,CDH13,CLTC,CNN3,CSRP1,CSRP2,CTNNA1,CTNNB1,CTTN,EPB41L2,FAP,FHL3,FLII,FLOT2,GDI2,GJA1,PDIA3,GSN,HSPA8,HSPA9,HSPG2,TNC,ILK,ITGA6,ITGAV,ITGB1,ITGB5,JUP,LASP1,LRP1,CD99,MSN,MYH9,RPL10A,NEDD9,NPM1,P4HB,PLEC,PPP1CB,MAP2K1,RAC1,RDX,RPL3,RPL4,RPL5,RPL6,RPL7A,RPL8,RPL9,RPL12,RPL27,RPL30,RPL31,RPL37A,RPL38,RPLP2,RPS2,RPS3A,…
1_Member	GO Cellular Components	GO:0005925	focal adhesion	-78.9094	-74.5507	121/405	60,70,71,81,118,301,308,309,527,567,682,960,975,977,998,1012,1213,1266,1465,1466,1495,1499,2017,2037,2191,2275,2314,2319,2665,2697,2923,2934,3312,3313,3339,3371,3611,3655,3685,3688,3693,3728,3927,4035,4267,4478,4627,4736,4739,4869,5034,5339,5500,5604,5879,5962,6122,6124,6125,6128,6130,6132,6133,6136,6155,6156,6160,6168,6169,6181,6187,6189,6191,6193,6201,6202,6205,6207,6217,6222,6223,6235,6385,638…	ACTB,ACTC1,ACTG1,ACTN4,ADD1,ANXA1,ANXA5,ANXA6,ATP6V0C,B2M,BSG,CD44,CD81,CD151,CDC42,CDH13,CLTC,CNN3,CSRP1,CSRP2,CTNNA1,CTNNB1,CTTN,EPB41L2,FAP,FHL3,FLII,FLOT2,GDI2,GJA1,PDIA3,GSN,HSPA8,HSPA9,HSPG2,TNC,ILK,ITGA6,ITGAV,ITGB1,ITGB5,JUP,LASP1,LRP1,CD99,MSN,MYH9,RPL10A,NEDD9,NPM1,P4HB,PLEC,PPP1CB,MAP2K1,RAC1,RDX,RPL3,RPL4,RPL5,RPL6,RPL7A,RPL8,RPL9,RPL12,RPL27,RPL30,RPL31,RPL37A,RPL38,RPLP2,RPS2,RPS3A,…
1_Member	GO Cellular Components	GO:0005924	cell-substrate adherens junction	-78.4887	-74.431	121/408	60,70,71,81,118,301,308,309,527,567,682,960,975,977,998,1012,1213,1266,1465,1466,1495,1499,2017,2037,2191,2275,2314,2319,2665,2697,2923,2934,3312,3313,3339,3371,3611,3655,3685,3688,3693,3728,3927,4035,4267,4478,4627,4736,4739,4869,5034,5339,5500,5604,5879,5962,6122,6124,6125,6128,6130,6132,6133,6136,6155,6156,6160,6168,6169,6181,6187,6189,6191,6193,6201,6202,6205,6207,6217,6222,6223,6235,6385,638…	ACTB,ACTC1,ACTG1,ACTN4,ADD1,ANXA1,ANXA5,ANXA6,ATP6V0C,B2M,BSG,CD44,CD81,CD151,CDC42,CDH13,CLTC,CNN3,CSRP1,CSRP2,CTNNA1,CTNNB1,CTTN,EPB41L2,FAP,FHL3,FLII,FLOT2,GDI2,GJA1,PDIA3,GSN,HSPA8,HSPA9,HSPG2,TNC,ILK,ITGA6,ITGAV,ITGB1,ITGB5,JUP,LASP1,LRP1,CD99,MSN,MYH9,RPL10A,NEDD9,NPM1,P4HB,PLEC,PPP1CB,MAP2K1,RAC1,RDX,RPL3,RPL4,RPL5,RPL6,RPL7A,RPL8,RPL9,RPL12,RPL27,RPL30,RPL31,RPL37A,RPL38,RPLP2,RPS2,RPS3A,…
1_Member	GO Cellular Components	GO:0030055	cell-substrate junction	-77.9341	-74.0525	121/412	60,70,71,81,118,301,308,309,527,567,682,960,975,977,998,1012,1213,1266,1465,1466,1495,1499,2017,2037,2191,2275,2314,2319,2665,2697,2923,2934,3312,3313,3339,3371,3611,3655,3685,3688,3693,3728,3927,4035,4267,4478,4627,4736,4739,4869,5034,5339,5500,5604,5879,5962,6122,6124,6125,6128,6130,6132,6133,6136,6155,6156,6160,6168,6169,6181,6187,6189,6191,6193,6201,6202,6205,6207,6217,6222,6223,6235,6385,638…	ACTB,ACTC1,ACTG1,ACTN4,ADD1,ANXA1,ANXA5,ANXA6,ATP6V0C,B2M,BSG,CD44,CD81,CD151,CDC42,CDH13,CLTC,CNN3,CSRP1,CSRP2,CTNNA1,CTNNB1,CTTN,EPB41L2,FAP,FHL3,FLII,FLOT2,GDI2,GJA1,PDIA3,GSN,HSPA8,HSPA9,HSPG2,TNC,ILK,ITGA6,ITGAV,ITGB1,ITGB5,JUP,LASP1,LRP1,CD99,MSN,MYH9,RPL10A,NEDD9,NPM1,P4HB,PLEC,PPP1CB,MAP2K1,RAC1,RDX,RPL3,RPL4,RPL5,RPL6,RPL7A,RPL8,RPL9,RPL12,RPL27,RPL30,RPL31,RPL37A,RPL38,RPLP2,RPS2,RPS3A,…
1_Member	GO Cellular Components	GO:0005912	adherens junction	-72.2536	-68.497	130/539	60,70,71,81,118,301,302,308,309,488,527,567,682,960,975,977,998,1012,1213,1266,1465,1466,1495,1499,1500,1982,2017,2037,2191,2275,2314,2319,2665,2697,2923,2934,3312,3313,3339,3371,3611,3655,3685,3688,3693,3728,3927,4035,4267,4478,4627,4736,4739,4851,4869,5034,5339,5499,5500,5604,5879,5962,6122,6124,6125,6128,6130,6132,6133,6136,6155,6156,6160,6168,6169,6181,6187,6189,6191,6193,6201,6202,6205,6207,…	ACTB,ACTC1,ACTG1,ACTN4,ADD1,ANXA1,ANXA2,ANXA5,ANXA6,ATP2A2,ATP6V0C,B2M,BSG,CD44,CD81,CD151,CDC42,CDH13,CLTC,CNN3,CSRP1,CSRP2,CTNNA1,CTNNB1,CTNND1,EIF4G2,CTTN,EPB41L2,FAP,FHL3,FLII,FLOT2,GDI2,GJA1,PDIA3,GSN,HSPA8,HSPA9,HSPG2,TNC,ILK,ITGA6,ITGAV,ITGB1,ITGB5,JUP,LASP1,LRP1,CD99,MSN,MYH9,RPL10A,NEDD9,NOTCH1,NPM1,P4HB,PLEC,PPP1CA,PPP1CB,MAP2K1,RAC1,RDX,RPL3,RPL4,RPL5,RPL6,RPL7A,RPL8,RPL9,RPL12,RPL27,R…
1_Member	GO Cellular Components	GO:0070161	anchoring junction	-70.5765	-66.9168	130/555	60,70,71,81,118,301,302,308,309,488,527,567,682,960,975,977,998,1012,1213,1266,1465,1466,1495,1499,1500,1982,2017,2037,2191,2275,2314,2319,2665,2697,2923,2934,3312,3313,3339,3371,3611,3655,3685,3688,3693,3728,3927,4035,4267,4478,4627,4736,4739,4851,4869,5034,5339,5499,5500,5604,5879,5962,6122,6124,6125,6128,6130,6132,6133,6136,6155,6156,6160,6168,6169,6181,6187,6189,6191,6193,6201,6202,6205,6207,…	ACTB,ACTC1,ACTG1,ACTN4,ADD1,ANXA1,ANXA2,ANXA5,ANXA6,ATP2A2,ATP6V0C,B2M,BSG,CD44,CD81,CD151,CDC42,CDH13,CLTC,CNN3,CSRP1,CSRP2,CTNNA1,CTNNB1,CTNND1,EIF4G2,CTTN,EPB41L2,FAP,FHL3,FLII,FLOT2,GDI2,GJA1,PDIA3,GSN,HSPA8,HSPA9,HSPG2,TNC,ILK,ITGA6,ITGAV,ITGB1,ITGB5,JUP,LASP1,LRP1,CD99,MSN,MYH9,RPL10A,NEDD9,NOTCH1,NPM1,P4HB,PLEC,PPP1CA,PPP1CB,MAP2K1,RAC1,RDX,RPL3,RPL4,RPL5,RPL6,RPL7A,RPL8,RPL9,RPL12,RPL27,R…
2_Summary	GO Biological Processes	GO:0006413	translational initiation	-45.7354	-42.1548	65/193	468,1974,1978,1981,1982,3646,4736,4869,5499,5611,6122,6124,6125,6128,6130,6132,6133,6135,6136,6137,6138,6142,6152,6154,6155,6156,6157,6159,6160,6165,6168,6169,6181,6187,6189,6191,6193,6198,6201,6202,6205,6206,6207,6210,6217,6222,6223,6224,6228,6229,6233,6235,7458,8661,8662,8664,8667,8668,9349,10480,11224,23367,25873,51386,51441,1153,1655,2107,3192,3312,4670,4904,5685,5689,5690,5695,5706,5707,5708…	ATF4,EIF4A2,EIF4EBP1,EIF4G1,EIF4G2,EIF3E,RPL10A,NPM1,PPP1CA,DNAJC3,RPL3,RPL4,RPL5,RPL6,RPL7A,RPL8,RPL9,RPL11,RPL12,RPL13,RPL15,RPL18A,RPL24,RPL26,RPL27,RPL30,RPL27A,RPL29,RPL31,RPL35A,RPL37A,RPL38,RPLP2,RPS2,RPS3A,RPS4X,RPS5,RPS6KB1,RPS7,RPS8,RPS11,RPS12,RPS13,RPS15A,RPS16,RPS18,RPS19,RPS20,RPS23,RPS24,RPS27A,RPS29,EIF4H,EIF3A,EIF3B,EIF3D,EIF3H,EIF3I,RPL23,EIF3M,RPL35,LARP1,RPL36,EIF3L,YTHDF2,CIR…
2_Member	GO Biological Processes	GO:0006413	translational initiation	-45.7354	-42.1548	65/193	468,1974,1978,1981,1982,3646,4736,4869,5499,5611,6122,6124,6125,6128,6130,6132,6133,6135,6136,6137,6138,6142,6152,6154,6155,6156,6157,6159,6160,6165,6168,6169,6181,6187,6189,6191,6193,6198,6201,6202,6205,6206,6207,6210,6217,6222,6223,6224,6228,6229,6233,6235,7458,8661,8662,8664,8667,8668,9349,10480,11224,23367,25873,51386,51441	ATF4,EIF4A2,EIF4EBP1,EIF4G1,EIF4G2,EIF3E,RPL10A,NPM1,PPP1CA,DNAJC3,RPL3,RPL4,RPL5,RPL6,RPL7A,RPL8,RPL9,RPL11,RPL12,RPL13,RPL15,RPL18A,RPL24,RPL26,RPL27,RPL30,RPL27A,RPL29,RPL31,RPL35A,RPL37A,RPL38,RPLP2,RPS2,RPS3A,RPS4X,RPS5,RPS6KB1,RPS7,RPS8,RPS11,RPS12,RPS13,RPS15A,RPS16,RPS18,RPS19,RPS20,RPS23,RPS24,RPS27A,RPS29,EIF4H,EIF3A,EIF3B,EIF3D,EIF3H,EIF3I,RPL23,EIF3M,RPL35,LARP1,RPL36,EIF3L,YTHDF2
2_Member	GO Biological Processes	GO:0006402	mRNA catabolic process	-43.5185	-40.0049	83/365	1153,1655,1981,2107,3192,3312,3646,4670,4736,4869,4904,5685,5689,5690,5695,5706,5707,5708,5709,5713,5719,6050,6093,6122,6124,6125,6128,6130,6132,6133,6135,6136,6137,6138,6142,6152,6154,6155,6156,6157,6159,6160,6165,6168,6169,6181,6187,6189,6191,6193,6201,6202,6205,6206,6207,6210,6217,6222,6223,6224,6228,6229,6233,6235,6418,7431,7529,7812,7832,8087,8531,9349,9475,9775,9967,11224,22794,23019,23034,…	CIRBP,DDX5,EIF4G1,ETF1,HNRNPU,HSPA8,EIF3E,HNRNPM,RPL10A,NPM1,YBX1,PSMA4,PSMB1,PSMB2,PSMB7,PSMC6,PSMD1,PSMD2,PSMD3,PSMD7,PSMD13,RNH1,ROCK1,RPL3,RPL4,RPL5,RPL6,RPL7A,RPL8,RPL9,RPL11,RPL12,RPL13,RPL15,RPL18A,RPL24,RPL26,RPL27,RPL30,RPL27A,RPL29,RPL31,RPL35A,RPL37A,RPL38,RPLP2,RPS2,RPS3A,RPS4X,RPS5,RPS7,RPS8,RPS11,RPS12,RPS13,RPS15A,RPS16,RPS18,RPS19,RPS20,RPS23,RPS24,RPS27A,RPS29,SET,VIM,YWHAB,CSDE1…
2_Member	GO Biological Processes	GO:0006613	cotranslational protein targeting to membrane	-43.1701	-39.7144	50/109	4736,6122,6124,6125,6128,6130,6132,6133,6135,6136,6137,6138,6142,6152,6154,6155,6156,6157,6159,6160,6165,6168,6169,6181,6187,6189,6191,6193,6201,6202,6205,6206,6207,6210,6217,6222,6223,6224,6228,6229,6233,6235,6731,6734,6746,6747,9349,9697,11224,25873	RPL10A,RPL3,RPL4,RPL5,RPL6,RPL7A,RPL8,RPL9,RPL11,RPL12,RPL13,RPL15,RPL18A,RPL24,RPL26,RPL27,RPL30,RPL27A,RPL29,RPL31,RPL35A,RPL37A,RPL38,RPLP2,RPS2,RPS3A,RPS4X,RPS5,RPS7,RPS8,RPS11,RPS12,RPS13,RPS15A,RPS16,RPS18,RPS19,RPS20,RPS23,RPS24,RPS27A,RPS29,SRP72,SRPRA,SSR2,SSR3,RPL23,TRAM2,RPL35,RPL36
2_Member	GO Biological Processes	GO:0070972	protein localization to endoplasmic reticulum	-42.8456	-39.4712	56/147	4736,6122,6124,6125,6128,6130,6132,6133,6135,6136,6137,6138,6142,6152,6154,6155,6156,6157,6159,6160,6165,6168,6169,6181,6187,6189,6191,6193,6201,6202,6205,6206,6207,6210,6217,6222,6223,6224,6228,6229,6233,6235,6731,6734,6747,8729,9349,9697,9789,10890,11014,11015,11224,25873,57142,128866	RPL10A,RPL3,RPL4,RPL5,RPL6,RPL7A,RPL8,RPL9,RPL11,RPL12,RPL13,RPL15,RPL18A,RPL24,RPL26,RPL27,RPL30,RPL27A,RPL29,RPL31,RPL35A,RPL37A,RPL38,RPLP2,RPS2,RPS3A,RPS4X,RPS5,RPS7,RPS8,RPS11,RPS12,RPS13,RPS15A,RPS16,RPS18,RPS19,RPS20,RPS23,RPS24,RPS27A,RPS29,SRP72,SRPRA,SSR3,GBF1,RPL23,TRAM2,SPCS2,RAB10,KDELR2,KDELR3,RPL35,RPL36,RTN4,CHMP4B
2_Member	GO Biological Processes	GO:0072599	establishment of protein localization to endoplasmic reticulum	-42.8299	-39.4712	52/122	4736,6122,6124,6125,6128,6130,6132,6133,6135,6136,6137,6138,6142,6152,6154,6155,6156,6157,6159,6160,6165,6168,6169,6181,6187,6189,6191,6193,6201,6202,6205,6206,6207,6210,6217,6222,6223,6224,6228,6229,6233,6235,6731,6734,6747,9349,9697,9789,10890,11224,25873,128866	RPL10A,RPL3,RPL4,RPL5,RPL6,RPL7A,RPL8,RPL9,RPL11,RPL12,RPL13,RPL15,RPL18A,RPL24,RPL26,RPL27,RPL30,RPL27A,RPL29,RPL31,RPL35A,RPL37A,RPL38,RPLP2,RPS2,RPS3A,RPS4X,RPS5,RPS7,RPS8,RPS11,RPS12,RPS13,RPS15A,RPS16,RPS18,RPS19,RPS20,RPS23,RPS24,RPS27A,RPS29,SRP72,SRPRA,SSR3,RPL23,TRAM2,SPCS2,RAB10,RPL35,RPL36,CHMP4B
2_Member	GO Biological Processes	GO:0006614	SRP-dependent cotranslational protein targeting to membrane	-42.7746	-39.4573	49/105	4736,6122,6124,6125,6128,6130,6132,6133,6135,6136,6137,6138,6142,6152,6154,6155,6156,6157,6159,6160,6165,6168,6169,6181,6187,6189,6191,6193,6201,6202,6205,6206,6207,6210,6217,6222,6223,6224,6228,6229,6233,6235,6731,6734,6747,9349,9697,11224,25873	RPL10A,RPL3,RPL4,RPL5,RPL6,RPL7A,RPL8,RPL9,RPL11,RPL12,RPL13,RPL15,RPL18A,RPL24,RPL26,RPL27,RPL30,RPL27A,RPL29,RPL31,RPL35A,RPL37A,RPL38,RPLP2,RPS2,RPS3A,RPS4X,RPS5,RPS7,RPS8,RPS11,RPS12,RPS13,RPS15A,RPS16,RPS18,RPS19,RPS20,RPS23,RPS24,RPS27A,RPS29,SRP72,SRPRA,SSR3,RPL23,TRAM2,RPL35,RPL36
2_Member	GO Biological Processes	GO:0045047	protein targeting to ER	-42.3886	-39.1091	51/118	4736,6122,6124,6125,6128,6130,6132,6133,6135,6136,6137,6138,6142,6152,6154,6155,6156,6157,6159,6160,6165,6168,6169,6181,6187,6189,6191,6193,6201,6202,6205,6206,6207,6210,6217,6222,6223,6224,6228,6229,6233,6235,6731,6734,6747,9349,9697,9789,11224,25873,128866	RPL10A,RPL3,RPL4,RPL5,RPL6,RPL7A,RPL8,RPL9,RPL11,RPL12,RPL13,RPL15,RPL18A,RPL24,RPL26,RPL27,RPL30,RPL27A,RPL29,RPL31,RPL35A,RPL37A,RPL38,RPLP2,RPS2,RPS3A,RPS4X,RPS5,RPS7,RPS8,RPS11,RPS12,RPS13,RPS15A,RPS16,RPS18,RPS19,RPS20,RPS23,RPS24,RPS27A,RPS29,SRP72,SRPRA,SSR3,RPL23,TRAM2,SPCS2,RPL35,RPL36,CHMP4B
2_Member	GO Biological Processes	GO:0006401	RNA catabolic process	-41.3715	-38.1589	84/398	1153,1655,1981,2107,3192,3312,3646,4670,4736,4869,4904,5685,5689,5690,5695,5706,5707,5708,5709,5713,5719,6050,6093,6122,6124,6125,6128,6130,6132,6133,6135,6136,6137,6138,6142,6152,6154,6155,6156,6157,6159,6160,6165,6168,6169,6181,6187,6189,6191,6193,6201,6202,6205,6206,6207,6210,6217,6222,6223,6224,6228,6229,6233,6235,6418,7431,7529,7812,7832,8087,8531,9349,9475,9775,9967,11224,22794,23019,23034,…	CIRBP,DDX5,EIF4G1,ETF1,HNRNPU,HSPA8,EIF3E,HNRNPM,RPL10A,NPM1,YBX1,PSMA4,PSMB1,PSMB2,PSMB7,PSMC6,PSMD1,PSMD2,PSMD3,PSMD7,PSMD13,RNH1,ROCK1,RPL3,RPL4,RPL5,RPL6,RPL7A,RPL8,RPL9,RPL11,RPL12,RPL13,RPL15,RPL18A,RPL24,RPL26,RPL27,RPL30,RPL27A,RPL29,RPL31,RPL35A,RPL37A,RPL38,RPLP2,RPS2,RPS3A,RPS4X,RPS5,RPS7,RPS8,RPS11,RPS12,RPS13,RPS15A,RPS16,RPS18,RPS19,RPS20,RPS23,RPS24,RPS27A,RPS29,SET,VIM,YWHAB,CSDE1…
2_Member	GO Biological Processes	GO:0000184	nuclear-transcribed mRNA catabolic process, nonsense-mediated decay	-40.5945	-37.4119	50/120	1981,2107,3646,4736,6122,6124,6125,6128,6130,6132,6133,6135,6136,6137,6138,6142,6152,6154,6155,6156,6157,6159,6160,6165,6168,6169,6181,6187,6189,6191,6193,6201,6202,6205,6206,6207,6210,6217,6222,6223,6224,6228,6229,6233,6235,9349,9775,11224,22794,25873	EIF4G1,ETF1,EIF3E,RPL10A,RPL3,RPL4,RPL5,RPL6,RPL7A,RPL8,RPL9,RPL11,RPL12,RPL13,RPL15,RPL18A,RPL24,RPL26,RPL27,RPL30,RPL27A,RPL29,RPL31,RPL35A,RPL37A,RPL38,RPLP2,RPS2,RPS3A,RPS4X,RPS5,RPS7,RPS8,RPS11,RPS12,RPS13,RPS15A,RPS16,RPS18,RPS19,RPS20,RPS23,RPS24,RPS27A,RPS29,RPL23,EIF4A3,RPL35,CASC3,RPL36
2_Member	GO Biological Processes	GO:0072657	protein localization to membrane	-39.4279	-36.2733	101/617	60,163,302,682,975,1173,1213,1855,2239,2319,2934,3308,3320,3688,3728,3799,4035,4641,4736,5962,6093,6122,6124,6125,6128,6130,6132,6133,6135,6136,6137,6138,6142,6152,6154,6155,6156,6157,6159,6160,6165,6168,6169,6181,6187,6189,6191,6193,6201,6202,6205,6206,6207,6210,6217,6222,6223,6224,6228,6229,6233,6235,6386,6731,6734,6746,6747,7070,7529,7531,7871,8301,8394,8766,8878,9146,9230,9349,9475,9697,9777,…	ACTB,AP2B1,ANXA2,BSG,CD81,AP2M1,CLTC,DVL1,GPC4,FLOT2,GSN,HSPA4,HSP90AA1,ITGB1,JUP,KIF5B,LRP1,MYO1C,RPL10A,RDX,ROCK1,RPL3,RPL4,RPL5,RPL6,RPL7A,RPL8,RPL9,RPL11,RPL12,RPL13,RPL15,RPL18A,RPL24,RPL26,RPL27,RPL30,RPL27A,RPL29,RPL31,RPL35A,RPL37A,RPL38,RPLP2,RPS2,RPS3A,RPS4X,RPS5,RPS7,RPS8,RPS11,RPS12,RPS13,RPS15A,RPS16,RPS18,RPS19,RPS20,RPS23,RPS24,RPS27A,RPS29,SDCBP,SRP72,SRPRA,SSR2,SSR3,THY1,YWHAB,YW…
2_Member	GO Biological Processes	GO:0072594	establishment of protein localization to organelle	-39.0646	-35.9364	94/538	665,868,1191,3098,3099,3308,3312,3320,3728,3837,3916,3920,3998,4000,4736,5901,6122,6124,6125,6128,6130,6132,6133,6135,6136,6137,6138,6142,6152,6154,6155,6156,6157,6159,6160,6165,6168,6169,6181,6187,6189,6191,6193,6201,6202,6205,6206,6207,6210,6217,6222,6223,6224,6228,6229,6233,6235,6342,6731,6734,6747,6774,6950,7203,7323,7332,7385,7529,7531,7879,8766,9146,9349,9697,9789,10527,10574,10628,10890,10…	BNIP3L,CBLB,CLU,HK1,HK2,HSPA4,HSPA8,HSP90AA1,JUP,KPNB1,LAMP1,LAMP2,LMAN1,LMNA,RPL10A,RAN,RPL3,RPL4,RPL5,RPL6,RPL7A,RPL8,RPL9,RPL11,RPL12,RPL13,RPL15,RPL18A,RPL24,RPL26,RPL27,RPL30,RPL27A,RPL29,RPL31,RPL35A,RPL37A,RPL38,RPLP2,RPS2,RPS3A,RPS4X,RPS5,RPS7,RPS8,RPS11,RPS12,RPS13,RPS15A,RPS16,RPS18,RPS19,RPS20,RPS23,RPS24,RPS27A,RPS29,SCP2,SRP72,SRPRA,SSR3,STAT3,TCP1,CCT3,UBE2D3,UBE2L3,UQCRC2,YWHAB,YWH…
2_Member	GO Biological Processes	GO:0006605	protein targeting	-36.9956	-33.8921	82/429	665,1191,3308,3312,3320,3920,3998,4053,4641,4736,6122,6124,6125,6128,6130,6132,6133,6135,6136,6137,6138,6142,6152,6154,6155,6156,6157,6159,6160,6165,6168,6169,6181,6187,6189,6191,6193,6201,6202,6205,6206,6207,6210,6217,6222,6223,6224,6228,6229,6233,6235,6342,6386,6731,6734,6746,6747,7323,7332,7385,7529,7531,7879,9146,9349,9697,9789,10519,11140,11224,25873,26063,51100,51114,54469,56993,57154,59286…	BNIP3L,CLU,HSPA4,HSPA8,HSP90AA1,LAMP2,LMAN1,LTBP2,MYO1C,RPL10A,RPL3,RPL4,RPL5,RPL6,RPL7A,RPL8,RPL9,RPL11,RPL12,RPL13,RPL15,RPL18A,RPL24,RPL26,RPL27,RPL30,RPL27A,RPL29,RPL31,RPL35A,RPL37A,RPL38,RPLP2,RPS2,RPS3A,RPS4X,RPS5,RPS7,RPS8,RPS11,RPS12,RPS13,RPS15A,RPS16,RPS18,RPS19,RPS20,RPS23,RPS24,RPS27A,RPS29,SCP2,SDCBP,SRP72,SRPRA,SSR2,SSR3,UBE2D3,UBE2L3,UQCRC2,YWHAB,YWHAE,RAB7A,HGS,RPL23,TRAM2,SPCS2,…
2_Member	GO Cellular Components	GO:0022626	cytosolic ribosome	-36.8145	-33.7568	46/113	1981,4736,6122,6124,6125,6128,6130,6132,6133,6135,6136,6137,6138,6142,6152,6154,6155,6156,6157,6159,6160,6165,6168,6169,6181,6187,6189,6191,6193,6201,6202,6205,6206,6207,6210,6217,6222,6223,6224,6228,6229,6233,6235,9349,11224,25873	EIF4G1,RPL10A,RPL3,RPL4,RPL5,RPL6,RPL7A,RPL8,RPL9,RPL11,RPL12,RPL13,RPL15,RPL18A,RPL24,RPL26,RPL27,RPL30,RPL27A,RPL29,RPL31,RPL35A,RPL37A,RPL38,RPLP2,RPS2,RPS3A,RPS4X,RPS5,RPS7,RPS8,RPS11,RPS12,RPS13,RPS15A,RPS16,RPS18,RPS19,RPS20,RPS23,RPS24,RPS27A,RPS29,RPL23,RPL35,RPL36
2_Member	GO Biological Processes	GO:0034655	nucleobase-containing compound catabolic process	-36.6363	-33.5998	99/637	191,405,1153,1655,1981,2023,2107,2821,3094,3098,3099,3192,3251,3312,3646,3837,4670,4736,4869,4904,5214,5685,5689,5690,5695,5706,5707,5708,5709,5713,5719,6050,6093,6122,6124,6125,6128,6130,6132,6133,6135,6136,6137,6138,6142,6152,6154,6155,6156,6157,6159,6160,6165,6168,6169,6181,6187,6189,6191,6193,6201,6202,6205,6206,6207,6210,6217,6222,6223,6224,6228,6229,6233,6235,6396,6418,6774,7415,7431,7529,7…	AHCY,ARNT,CIRBP,DDX5,EIF4G1,ENO1,ETF1,GPI,HINT1,HK1,HK2,HNRNPU,HPRT1,HSPA8,EIF3E,KPNB1,HNRNPM,RPL10A,NPM1,YBX1,PFKP,PSMA4,PSMB1,PSMB2,PSMB7,PSMC6,PSMD1,PSMD2,PSMD3,PSMD7,PSMD13,RNH1,ROCK1,RPL3,RPL4,RPL5,RPL6,RPL7A,RPL8,RPL9,RPL11,RPL12,RPL13,RPL15,RPL18A,RPL24,RPL26,RPL27,RPL30,RPL27A,RPL29,RPL31,RPL35A,RPL37A,RPL38,RPLP2,RPS2,RPS3A,RPS4X,RPS5,RPS7,RPS8,RPS11,RPS12,RPS13,RPS15A,RPS16,RPS18,RPS19,…
2_Member	GO Biological Processes	GO:0044270	cellular nitrogen compound catabolic process	-35.9904	-32.9741	102/687	33,191,405,1153,1655,1981,2023,2107,2821,3094,3098,3099,3162,3192,3251,3312,3646,3837,4670,4736,4869,4904,5214,5447,5685,5689,5690,5695,5706,5707,5708,5709,5713,5719,6050,6093,6122,6124,6125,6128,6130,6132,6133,6135,6136,6137,6138,6142,6152,6154,6155,6156,6157,6159,6160,6165,6168,6169,6181,6187,6189,6191,6193,6201,6202,6205,6206,6207,6210,6217,6222,6223,6224,6228,6229,6233,6235,6396,6418,6774,741…	ACADL,AHCY,ARNT,CIRBP,DDX5,EIF4G1,ENO1,ETF1,GPI,HINT1,HK1,HK2,HMOX1,HNRNPU,HPRT1,HSPA8,EIF3E,KPNB1,HNRNPM,RPL10A,NPM1,YBX1,PFKP,POR,PSMA4,PSMB1,PSMB2,PSMB7,PSMC6,PSMD1,PSMD2,PSMD3,PSMD7,PSMD13,RNH1,ROCK1,RPL3,RPL4,RPL5,RPL6,RPL7A,RPL8,RPL9,RPL11,RPL12,RPL13,RPL15,RPL18A,RPL24,RPL26,RPL27,RPL30,RPL27A,RPL29,RPL31,RPL35A,RPL37A,RPL38,RPLP2,RPS2,RPS3A,RPS4X,RPS5,RPS7,RPS8,RPS11,RPS12,RPS13,RPS15A,RP…
2_Member	GO Biological Processes	GO:0019080	viral gene expression	-35.7281	-32.7312	56/191	3065,3725,4736,5045,5434,6122,6124,6125,6128,6130,6132,6133,6135,6136,6137,6138,6142,6152,6154,6155,6156,6157,6159,6160,6165,6168,6169,6181,6187,6189,6191,6193,6201,6202,6205,6206,6207,6210,6217,6222,6223,6224,6228,6229,6233,6235,6396,6597,8661,8662,8664,9349,11224,25873,51386,55706	HDAC1,JUN,RPL10A,FURIN,POLR2E,RPL3,RPL4,RPL5,RPL6,RPL7A,RPL8,RPL9,RPL11,RPL12,RPL13,RPL15,RPL18A,RPL24,RPL26,RPL27,RPL30,RPL27A,RPL29,RPL31,RPL35A,RPL37A,RPL38,RPLP2,RPS2,RPS3A,RPS4X,RPS5,RPS7,RPS8,RPS11,RPS12,RPS13,RPS15A,RPS16,RPS18,RPS19,RPS20,RPS23,RPS24,RPS27A,RPS29,SEC13,SMARCA4,EIF3A,EIF3B,EIF3D,RPL23,RPL35,RPL36,EIF3L,NDC1
2_Member	GO Biological Processes	GO:0046700	heterocycle catabolic process	-34.5764	-31.5979	100/686	191,405,1153,1655,1981,2023,2107,2821,3094,3098,3099,3162,3192,3251,3312,3646,3837,4670,4736,4869,4904,5214,5685,5689,5690,5695,5706,5707,5708,5709,5713,5719,6050,6093,6122,6124,6125,6128,6130,6132,6133,6135,6136,6137,6138,6142,6152,6154,6155,6156,6157,6159,6160,6165,6168,6169,6181,6187,6189,6191,6193,6201,6202,6205,6206,6207,6210,6217,6222,6223,6224,6228,6229,6233,6235,6396,6418,6774,7415,7431,7…	AHCY,ARNT,CIRBP,DDX5,EIF4G1,ENO1,ETF1,GPI,HINT1,HK1,HK2,HMOX1,HNRNPU,HPRT1,HSPA8,EIF3E,KPNB1,HNRNPM,RPL10A,NPM1,YBX1,PFKP,PSMA4,PSMB1,PSMB2,PSMB7,PSMC6,PSMD1,PSMD2,PSMD3,PSMD7,PSMD13,RNH1,ROCK1,RPL3,RPL4,RPL5,RPL6,RPL7A,RPL8,RPL9,RPL11,RPL12,RPL13,RPL15,RPL18A,RPL24,RPL26,RPL27,RPL30,RPL27A,RPL29,RPL31,RPL35A,RPL37A,RPL38,RPLP2,RPS2,RPS3A,RPS4X,RPS5,RPS7,RPS8,RPS11,RPS12,RPS13,RPS15A,RPS16,RPS18,…
2_Member	GO Biological Processes	GO:0006612	protein targeting to membrane	-34.1571	-31.1963	56/203	4641,4736,6122,6124,6125,6128,6130,6132,6133,6135,6136,6137,6138,6142,6152,6154,6155,6156,6157,6159,6160,6165,6168,6169,6181,6187,6189,6191,6193,6201,6202,6205,6206,6207,6210,6217,6222,6223,6224,6228,6229,6233,6235,6386,6731,6734,6746,6747,9349,9697,10519,11224,25873,51114,85377,128866	MYO1C,RPL10A,RPL3,RPL4,RPL5,RPL6,RPL7A,RPL8,RPL9,RPL11,RPL12,RPL13,RPL15,RPL18A,RPL24,RPL26,RPL27,RPL30,RPL27A,RPL29,RPL31,RPL35A,RPL37A,RPL38,RPLP2,RPS2,RPS3A,RPS4X,RPS5,RPS7,RPS8,RPS11,RPS12,RPS13,RPS15A,RPS16,RPS18,RPS19,RPS20,RPS23,RPS24,RPS27A,RPS29,SDCBP,SRP72,SRPRA,SSR2,SSR3,RPL23,TRAM2,CIB1,RPL35,RPL36,ZDHHC9,MICALL1,CHMP4B
2_Member	GO Biological Processes	GO:0019439	aromatic compound catabolic process	-33.7123	-30.785	100/702	191,405,1153,1655,1981,2023,2107,2821,3094,3098,3099,3162,3192,3251,3312,3646,3837,4670,4736,4869,4904,5214,5685,5689,5690,5695,5706,5707,5708,5709,5713,5719,6050,6093,6122,6124,6125,6128,6130,6132,6133,6135,6136,6137,6138,6142,6152,6154,6155,6156,6157,6159,6160,6165,6168,6169,6181,6187,6189,6191,6193,6201,6202,6205,6206,6207,6210,6217,6222,6223,6224,6228,6229,6233,6235,6396,6418,6774,7415,7431,7…	AHCY,ARNT,CIRBP,DDX5,EIF4G1,ENO1,ETF1,GPI,HINT1,HK1,HK2,HMOX1,HNRNPU,HPRT1,HSPA8,EIF3E,KPNB1,HNRNPM,RPL10A,NPM1,YBX1,PFKP,PSMA4,PSMB1,PSMB2,PSMB7,PSMC6,PSMD1,PSMD2,PSMD3,PSMD7,PSMD13,RNH1,ROCK1,RPL3,RPL4,RPL5,RPL6,RPL7A,RPL8,RPL9,RPL11,RPL12,RPL13,RPL15,RPL18A,RPL24,RPL26,RPL27,RPL30,RPL27A,RPL29,RPL31,RPL35A,RPL37A,RPL38,RPLP2,RPS2,RPS3A,RPS4X,RPS5,RPS7,RPS8,RPS11,RPS12,RPS13,RPS15A,RPS16,RPS18,…
2_Member	GO Biological Processes	GO:0000956	nuclear-transcribed mRNA catabolic process	-33.4164	-30.5048	56/209	1655,1981,2107,3646,4736,6122,6124,6125,6128,6130,6132,6133,6135,6136,6137,6138,6142,6152,6154,6155,6156,6157,6159,6160,6165,6168,6169,6181,6187,6189,6191,6193,6201,6202,6205,6206,6207,6210,6217,6222,6223,6224,6228,6229,6233,6235,7812,7832,9349,9775,9967,11224,22794,23019,23034,25873	DDX5,EIF4G1,ETF1,EIF3E,RPL10A,RPL3,RPL4,RPL5,RPL6,RPL7A,RPL8,RPL9,RPL11,RPL12,RPL13,RPL15,RPL18A,RPL24,RPL26,RPL27,RPL30,RPL27A,RPL29,RPL31,RPL35A,RPL37A,RPL38,RPLP2,RPS2,RPS3A,RPS4X,RPS5,RPS7,RPS8,RPS11,RPS12,RPS13,RPS15A,RPS16,RPS18,RPS19,RPS20,RPS23,RPS24,RPS27A,RPS29,CSDE1,BTG2,RPL23,EIF4A3,THRAP3,RPL35,CASC3,CNOT1,SAMD4A,RPL36
2_Member	GO Biological Processes	GO:1901361	organic cyclic compound catabolic process	-32.7088	-29.8125	101/735	191,405,1153,1655,1981,2023,2107,2821,3094,3098,3099,3162,3192,3251,3312,3646,3837,4670,4736,4869,4904,5214,5685,5689,5690,5695,5706,5707,5708,5709,5713,5719,6050,6093,6122,6124,6125,6128,6130,6132,6133,6135,6136,6137,6138,6142,6152,6154,6155,6156,6157,6159,6160,6165,6168,6169,6181,6187,6189,6191,6193,6201,6202,6205,6206,6207,6210,6217,6222,6223,6224,6228,6229,6233,6235,6396,6418,6774,7415,7431,7…	AHCY,ARNT,CIRBP,DDX5,EIF4G1,ENO1,ETF1,GPI,HINT1,HK1,HK2,HMOX1,HNRNPU,HPRT1,HSPA8,EIF3E,KPNB1,HNRNPM,RPL10A,NPM1,YBX1,PFKP,PSMA4,PSMB1,PSMB2,PSMB7,PSMC6,PSMD1,PSMD2,PSMD3,PSMD7,PSMD13,RNH1,ROCK1,RPL3,RPL4,RPL5,RPL6,RPL7A,RPL8,RPL9,RPL11,RPL12,RPL13,RPL15,RPL18A,RPL24,RPL26,RPL27,RPL30,RPL27A,RPL29,RPL31,RPL35A,RPL37A,RPL38,RPLP2,RPS2,RPS3A,RPS4X,RPS5,RPS7,RPS8,RPS11,RPS12,RPS13,RPS15A,RPS16,RPS18,…
2_Member	GO Biological Processes	GO:0043043	peptide biosynthetic process	-32.4568	-29.5752	101/740	48,351,468,708,1153,1613,1915,1937,1974,1978,1981,1982,2058,2107,2937,3029,3646,4076,4141,4677,4691,4736,4869,5045,5499,5611,5859,5914,6093,6122,6124,6125,6128,6130,6132,6133,6135,6136,6137,6138,6142,6152,6154,6155,6156,6157,6159,6160,6165,6168,6169,6181,6187,6189,6191,6193,6198,6201,6202,6205,6206,6207,6210,6217,6222,6223,6224,6228,6229,6233,6235,6238,6301,6774,7072,7431,7458,7832,8087,8531,8661…	ACO1,APP,ATF4,C1QBP,CIRBP,DAPK3,EEF1A1,EEF1G,EIF4A2,EIF4EBP1,EIF4G1,EIF4G2,EPRS,ETF1,GSS,HAGH,EIF3E,CAPRIN1,MARS,NARS,NCL,RPL10A,NPM1,FURIN,PPP1CA,DNAJC3,QARS,RARA,ROCK1,RPL3,RPL4,RPL5,RPL6,RPL7A,RPL8,RPL9,RPL11,RPL12,RPL13,RPL15,RPL18A,RPL24,RPL26,RPL27,RPL30,RPL27A,RPL29,RPL31,RPL35A,RPL37A,RPL38,RPLP2,RPS2,RPS3A,RPS4X,RPS5,RPS6KB1,RPS7,RPS8,RPS11,RPS12,RPS13,RPS15A,RPS16,RPS18,RPS19,RPS20,RPS2…
2_Member	GO Biological Processes	GO:0090150	establishment of protein localization to membrane	-32.4329	-29.5656	68/334	3308,3320,4641,4736,6122,6124,6125,6128,6130,6132,6133,6135,6136,6137,6138,6142,6152,6154,6155,6156,6157,6159,6160,6165,6168,6169,6181,6187,6189,6191,6193,6201,6202,6205,6206,6207,6210,6217,6222,6223,6224,6228,6229,6233,6235,6386,6731,6734,6746,6747,7529,7531,8766,9230,9349,9697,10519,10890,10971,11224,23499,23513,25873,26088,51114,56993,85377,128866	HSPA4,HSP90AA1,MYO1C,RPL10A,RPL3,RPL4,RPL5,RPL6,RPL7A,RPL8,RPL9,RPL11,RPL12,RPL13,RPL15,RPL18A,RPL24,RPL26,RPL27,RPL30,RPL27A,RPL29,RPL31,RPL35A,RPL37A,RPL38,RPLP2,RPS2,RPS3A,RPS4X,RPS5,RPS7,RPS8,RPS11,RPS12,RPS13,RPS15A,RPS16,RPS18,RPS19,RPS20,RPS23,RPS24,RPS27A,RPS29,SDCBP,SRP72,SRPRA,SSR2,SSR3,YWHAB,YWHAE,RAB11A,RAB11B,RPL23,TRAM2,CIB1,RAB10,YWHAQ,RPL35,MACF1,SCRIB,RPL36,GGA1,ZDHHC9,TOMM22,MIC…
2_Member	GO Biological Processes	GO:0019083	viral transcription	-32.1536	-29.3	51/177	3065,3725,4736,5434,6122,6124,6125,6128,6130,6132,6133,6135,6136,6137,6138,6142,6152,6154,6155,6156,6157,6159,6160,6165,6168,6169,6181,6187,6189,6191,6193,6201,6202,6205,6206,6207,6210,6217,6222,6223,6224,6228,6229,6233,6235,6396,6597,9349,11224,25873,55706	HDAC1,JUN,RPL10A,POLR2E,RPL3,RPL4,RPL5,RPL6,RPL7A,RPL8,RPL9,RPL11,RPL12,RPL13,RPL15,RPL18A,RPL24,RPL26,RPL27,RPL30,RPL27A,RPL29,RPL31,RPL35A,RPL37A,RPL38,RPLP2,RPS2,RPS3A,RPS4X,RPS5,RPS7,RPS8,RPS11,RPS12,RPS13,RPS15A,RPS16,RPS18,RPS19,RPS20,RPS23,RPS24,RPS27A,RPS29,SEC13,SMARCA4,RPL23,RPL35,RPL36,NDC1
2_Member	GO Biological Processes	GO:0006412	translation	-31.6249	-28.7847	98/715	48,351,468,708,1153,1613,1915,1937,1974,1978,1981,1982,2058,2107,3646,4076,4141,4677,4691,4736,4869,5499,5611,5859,5914,6093,6122,6124,6125,6128,6130,6132,6133,6135,6136,6137,6138,6142,6152,6154,6155,6156,6157,6159,6160,6165,6168,6169,6181,6187,6189,6191,6193,6198,6201,6202,6205,6206,6207,6210,6217,6222,6223,6224,6228,6229,6233,6235,6238,6301,6774,7072,7431,7458,7832,8087,8531,8661,8662,8664,8667…	ACO1,APP,ATF4,C1QBP,CIRBP,DAPK3,EEF1A1,EEF1G,EIF4A2,EIF4EBP1,EIF4G1,EIF4G2,EPRS,ETF1,EIF3E,CAPRIN1,MARS,NARS,NCL,RPL10A,NPM1,PPP1CA,DNAJC3,QARS,RARA,ROCK1,RPL3,RPL4,RPL5,RPL6,RPL7A,RPL8,RPL9,RPL11,RPL12,RPL13,RPL15,RPL18A,RPL24,RPL26,RPL27,RPL30,RPL27A,RPL29,RPL31,RPL35A,RPL37A,RPL38,RPLP2,RPS2,RPS3A,RPS4X,RPS5,RPS6KB1,RPS7,RPS8,RPS11,RPS12,RPS13,RPS15A,RPS16,RPS18,RPS19,RPS20,RPS23,RPS24,RPS27A,…
2_Member	GO Cellular Components	GO:0044445	cytosolic part	-31.107	-28.2797	58/248	1727,1978,1981,2023,3312,4736,5214,5706,5707,5708,6122,6124,6125,6128,6130,6132,6133,6135,6136,6137,6138,6142,6152,6154,6155,6156,6157,6159,6160,6165,6168,6169,6181,6187,6189,6191,6193,6201,6202,6205,6206,6207,6210,6217,6222,6223,6224,6228,6229,6233,6235,6950,7203,9349,9775,10574,11224,25873	CYB5R3,EIF4EBP1,EIF4G1,ENO1,HSPA8,RPL10A,PFKP,PSMC6,PSMD1,PSMD2,RPL3,RPL4,RPL5,RPL6,RPL7A,RPL8,RPL9,RPL11,RPL12,RPL13,RPL15,RPL18A,RPL24,RPL26,RPL27,RPL30,RPL27A,RPL29,RPL31,RPL35A,RPL37A,RPL38,RPLP2,RPS2,RPS3A,RPS4X,RPS5,RPS7,RPS8,RPS11,RPS12,RPS13,RPS15A,RPS16,RPS18,RPS19,RPS20,RPS23,RPS24,RPS27A,RPS29,TCP1,CCT3,RPL23,EIF4A3,CCT7,RPL35,RPL36
2_Member	KEGG Pathway	hsa03010	Ribosome	-28.7105	-25.9853	45/154	4736,6122,6124,6125,6128,6130,6132,6133,6135,6136,6137,6138,6142,6152,6154,6155,6156,6157,6159,6160,6165,6168,6169,6181,6187,6189,6191,6193,6201,6202,6205,6206,6207,6210,6217,6222,6223,6224,6228,6229,6233,6235,9349,11224,25873	RPL10A,RPL3,RPL4,RPL5,RPL6,RPL7A,RPL8,RPL9,RPL11,RPL12,RPL13,RPL15,RPL18A,RPL24,RPL26,RPL27,RPL30,RPL27A,RPL29,RPL31,RPL35A,RPL37A,RPL38,RPLP2,RPS2,RPS3A,RPS4X,RPS5,RPS7,RPS8,RPS11,RPS12,RPS13,RPS15A,RPS16,RPS18,RPS19,RPS20,RPS23,RPS24,RPS27A,RPS29,RPL23,RPL35,RPL36
2_Member	GO Cellular Components	GO:0044391	ribosomal subunit	-26.3198	-23.7245	47/191	1981,4736,6122,6124,6125,6128,6130,6132,6133,6135,6136,6137,6138,6142,6152,6154,6155,6156,6157,6159,6160,6165,6168,6169,6181,6187,6189,6191,6193,6201,6202,6205,6206,6207,6210,6217,6222,6223,6224,6228,6229,6233,6235,9349,11224,25873,84545	EIF4G1,RPL10A,RPL3,RPL4,RPL5,RPL6,RPL7A,RPL8,RPL9,RPL11,RPL12,RPL13,RPL15,RPL18A,RPL24,RPL26,RPL27,RPL30,RPL27A,RPL29,RPL31,RPL35A,RPL37A,RPL38,RPLP2,RPS2,RPS3A,RPS4X,RPS5,RPS7,RPS8,RPS11,RPS12,RPS13,RPS15A,RPS16,RPS18,RPS19,RPS20,RPS23,RPS24,RPS27A,RPS29,RPL23,RPL35,RPL36,MRPL43
2_Member	GO Molecular Functions	GO:0003735	structural constituent of ribosome	-24.3178	-21.7652	46/201	4736,6122,6124,6125,6128,6130,6132,6133,6135,6136,6137,6138,6142,6152,6154,6155,6156,6157,6159,6160,6165,6168,6169,6181,6187,6189,6191,6193,6201,6202,6205,6206,6207,6210,6217,6222,6223,6224,6228,6229,6233,6235,9349,11224,25873,84545	RPL10A,RPL3,RPL4,RPL5,RPL6,RPL7A,RPL8,RPL9,RPL11,RPL12,RPL13,RPL15,RPL18A,RPL24,RPL26,RPL27,RPL30,RPL27A,RPL29,RPL31,RPL35A,RPL37A,RPL38,RPLP2,RPS2,RPS3A,RPS4X,RPS5,RPS7,RPS8,RPS11,RPS12,RPS13,RPS15A,RPS16,RPS18,RPS19,RPS20,RPS23,RPS24,RPS27A,RPS29,RPL23,RPL35,RPL36,MRPL43
2_Member	GO Cellular Components	GO:0022625	cytosolic large ribosomal subunit	-22.7806	-20.248	27/62	4736,6122,6124,6125,6128,6130,6132,6133,6135,6136,6137,6138,6142,6152,6154,6155,6156,6157,6159,6160,6165,6168,6169,6181,9349,11224,25873	RPL10A,RPL3,RPL4,RPL5,RPL6,RPL7A,RPL8,RPL9,RPL11,RPL12,RPL13,RPL15,RPL18A,RPL24,RPL26,RPL27,RPL30,RPL27A,RPL29,RPL31,RPL35A,RPL37A,RPL38,RPLP2,RPL23,RPL35,RPL36
2_Member	GO Cellular Components	GO:0005840	ribosome	-21.9052	-19.3915	50/271	821,1981,4736,6122,6124,6125,6128,6130,6132,6133,6135,6136,6137,6138,6142,6152,6154,6155,6156,6157,6159,6160,6165,6168,6169,6181,6187,6189,6191,6193,6201,6202,6205,6206,6207,6210,6217,6222,6223,6224,6228,6229,6233,6235,6238,8667,9349,11224,25873,84545	CANX,EIF4G1,RPL10A,RPL3,RPL4,RPL5,RPL6,RPL7A,RPL8,RPL9,RPL11,RPL12,RPL13,RPL15,RPL18A,RPL24,RPL26,RPL27,RPL30,RPL27A,RPL29,RPL31,RPL35A,RPL37A,RPL38,RPLP2,RPS2,RPS3A,RPS4X,RPS5,RPS7,RPS8,RPS11,RPS12,RPS13,RPS15A,RPS16,RPS18,RPS19,RPS20,RPS23,RPS24,RPS27A,RPS29,RRBP1,EIF3H,RPL23,RPL35,RPL36,MRPL43
2_Member	GO Biological Processes	GO:0002181	cytoplasmic translation	-21.56	-19.0586	31/95	1978,1981,2107,3646,4736,6128,6132,6133,6135,6138,6142,6152,6154,6156,6159,6160,6165,6169,6228,6235,7458,8531,8661,8662,8664,8667,8668,10480,25873,51386,51441	EIF4EBP1,EIF4G1,ETF1,EIF3E,RPL10A,RPL6,RPL8,RPL9,RPL11,RPL15,RPL18A,RPL24,RPL26,RPL30,RPL29,RPL31,RPL35A,RPL38,RPS23,RPS29,EIF4H,YBX3,EIF3A,EIF3B,EIF3D,EIF3H,EIF3I,EIF3M,RPL36,EIF3L,YTHDF2
2_Member	GO Cellular Components	GO:0022627	cytosolic small ribosomal subunit	-15.899	-13.504	19/45	1981,6187,6189,6191,6193,6201,6202,6205,6206,6207,6210,6217,6222,6223,6224,6228,6229,6233,6235	EIF4G1,RPS2,RPS3A,RPS4X,RPS5,RPS7,RPS8,RPS11,RPS12,RPS13,RPS15A,RPS16,RPS18,RPS19,RPS20,RPS23,RPS24,RPS27A,RPS29
2_Member	GO Cellular Components	GO:0015934	large ribosomal subunit	-15.2651	-12.8932	28/120	4736,6122,6124,6125,6128,6130,6132,6133,6135,6136,6137,6138,6142,6152,6154,6155,6156,6157,6159,6160,6165,6168,6169,6181,9349,11224,25873,84545	RPL10A,RPL3,RPL4,RPL5,RPL6,RPL7A,RPL8,RPL9,RPL11,RPL12,RPL13,RPL15,RPL18A,RPL24,RPL26,RPL27,RPL30,RPL27A,RPL29,RPL31,RPL35A,RPL37A,RPL38,RPLP2,RPL23,RPL35,RPL36,MRPL43
2_Member	GO Cellular Components	GO:0005844	polysome	-14.1154	-11.7695	21/69	1981,4628,4736,6128,6130,6132,6135,6142,6152,6156,6160,6169,6191,6228,6235,7431,7458,8087,8667,23367,25873	EIF4G1,MYH10,RPL10A,RPL6,RPL7A,RPL8,RPL11,RPL18A,RPL24,RPL30,RPL31,RPL38,RPS4X,RPS23,RPS29,VIM,EIF4H,FXR1,EIF3H,LARP1,RPL36
2_Member	GO Cellular Components	GO:0042788	polysomal ribosome	-12.6147	-10.3732	14/30	4736,6128,6130,6132,6135,6142,6152,6156,6160,6169,6228,6235,8667,25873	RPL10A,RPL6,RPL7A,RPL8,RPL11,RPL18A,RPL24,RPL30,RPL31,RPL38,RPS23,RPS29,EIF3H,RPL36
2_Member	GO Cellular Components	GO:0015935	small ribosomal subunit	-11.477	-9.31964	19/73	1981,6187,6189,6191,6193,6201,6202,6205,6206,6207,6210,6217,6222,6223,6224,6228,6229,6233,6235	EIF4G1,RPS2,RPS3A,RPS4X,RPS5,RPS7,RPS8,RPS11,RPS12,RPS13,RPS15A,RPS16,RPS18,RPS19,RPS20,RPS23,RPS24,RPS27A,RPS29
2_Member	GO Biological Processes	GO:0042254	ribosome biogenesis	-5.65219	-4.03305	27/286	708,4736,4869,5901,6122,6125,6128,6130,6135,6136,6152,6154,6155,6165,6169,6187,6193,6201,6202,6217,6223,6229,9775,11224,50628,54680,404672	C1QBP,RPL10A,NPM1,RAN,RPL3,RPL5,RPL6,RPL7A,RPL11,RPL12,RPL24,RPL26,RPL27,RPL35A,RPL38,RPS2,RPS5,RPS7,RPS8,RPS16,RPS19,RPS24,EIF4A3,RPL35,GEMIN4,ZNHIT6,GTF2H5
2_Member	GO Biological Processes	GO:0016072	rRNA metabolic process	-4.4427	-2.99193	22/243	4141,4691,4736,6125,6130,6135,6154,6155,6165,6187,6201,6202,6217,6223,6229,6597,9775,11224,50628,54680,284119,404672	MARS,NCL,RPL10A,RPL5,RPL7A,RPL11,RPL26,RPL27,RPL35A,RPS2,RPS7,RPS8,RPS16,RPS19,RPS24,SMARCA4,EIF4A3,RPL35,GEMIN4,ZNHIT6,CAVIN1,GTF2H5
2_Member	GO Biological Processes	GO:0006364	rRNA processing	-3.52955	-2.21655	18/207	4736,6125,6130,6135,6154,6155,6165,6187,6201,6202,6217,6223,6229,9775,11224,50628,54680,404672	RPL10A,RPL5,RPL7A,RPL11,RPL26,RPL27,RPL35A,RPS2,RPS7,RPS8,RPS16,RPS19,RPS24,EIF4A3,RPL35,GEMIN4,ZNHIT6,GTF2H5
2_Member	GO Biological Processes	GO:0042274	ribosomal small subunit biogenesis	-2.78094	-1.59599	8/65	4869,6169,6193,6201,6202,6217,6223,6229	NPM1,RPL38,RPS5,RPS7,RPS8,RPS16,RPS19,RPS24
2_Member	GO Biological Processes	GO:0034660	ncRNA metabolic process	-2.48222	-1.35267	32/557	2058,3181,4141,4654,4677,4691,4736,5434,5859,5901,6125,6130,6135,6154,6155,6165,6187,6201,6202,6217,6223,6229,6301,6597,6884,9775,11224,27044,50628,54680,284119,404672	EPRS,HNRNPA2B1,MARS,MYOD1,NARS,NCL,RPL10A,POLR2E,QARS,RAN,RPL5,RPL7A,RPL11,RPL26,RPL27,RPL35A,RPS2,RPS7,RPS8,RPS16,RPS19,RPS24,SARS,SMARCA4,TAF13,EIF4A3,RPL35,SND1,GEMIN4,ZNHIT6,CAVIN1,GTF2H5
3_Summary	GO Molecular Functions	GO:0050839	cell adhesion molecule binding	-41.8334	-38.5886	93/489	81,101,118,301,302,392,682,800,822,832,975,977,1012,1266,1490,1495,1499,1500,1937,1982,2017,2023,2191,2200,2247,2335,3069,3312,3611,3646,3655,3685,3688,3693,3728,3799,3895,3913,3927,4240,4430,4478,4627,5034,5052,5214,5339,5499,5861,5901,5962,6128,6130,6138,6152,6159,6187,6282,6624,6709,7070,7077,7414,7458,7529,7531,8301,8407,8615,8826,8839,9230,9588,9689,10631,10890,22919,23367,23499,23513,23647,…	ACTN4,ADAM8,ADD1,ANXA1,ANXA2,ARHGAP1,BSG,CALD1,CAPG,CAPZB,CD81,CD151,CDH13,CNN3,CCN2,CTNNA1,CTNNB1,CTNND1,EEF1G,EIF4G2,CTTN,ENO1,FAP,FBN1,FGF2,FN1,HDLBP,HSPA8,ILK,EIF3E,ITGA6,ITGAV,ITGB1,ITGB5,JUP,KIF5B,KTN1,LAMB2,LASP1,MFGE8,MYO1B,MSN,MYH9,P4HB,PRDX1,PFKP,PLEC,PPP1CA,RAB1A,RAN,RDX,RPL6,RPL7A,RPL15,RPL24,RPL29,RPS2,S100A11,FSCN1,SPTAN1,THY1,TIMP2,VCL,EIF4H,YWHAB,YWHAE,PICALM,TAGLN2,USO1,IQGAP1,CC…
3_Member	GO Molecular Functions	GO:0050839	cell adhesion molecule binding	-41.8334	-38.5886	93/489	81,101,118,301,302,392,682,800,822,832,975,977,1012,1266,1490,1495,1499,1500,1937,1982,2017,2023,2191,2200,2247,2335,3069,3312,3611,3646,3655,3685,3688,3693,3728,3799,3895,3913,3927,4240,4430,4478,4627,5034,5052,5214,5339,5499,5861,5901,5962,6128,6130,6138,6152,6159,6187,6282,6624,6709,7070,7077,7414,7458,7529,7531,8301,8407,8615,8826,8839,9230,9588,9689,10631,10890,22919,23367,23499,23513,23647,…	ACTN4,ADAM8,ADD1,ANXA1,ANXA2,ARHGAP1,BSG,CALD1,CAPG,CAPZB,CD81,CD151,CDH13,CNN3,CCN2,CTNNA1,CTNNB1,CTNND1,EEF1G,EIF4G2,CTTN,ENO1,FAP,FBN1,FGF2,FN1,HDLBP,HSPA8,ILK,EIF3E,ITGA6,ITGAV,ITGB1,ITGB5,JUP,KIF5B,KTN1,LAMB2,LASP1,MFGE8,MYO1B,MSN,MYH9,P4HB,PRDX1,PFKP,PLEC,PPP1CA,RAB1A,RAN,RDX,RPL6,RPL7A,RPL15,RPL24,RPL29,RPS2,S100A11,FSCN1,SPTAN1,THY1,TIMP2,VCL,EIF4H,YWHAB,YWHAE,PICALM,TAGLN2,USO1,IQGAP1,CC…
3_Member	GO Molecular Functions	GO:0045296	cadherin binding	-36.9101	-33.8302	72/325	118,301,302,392,682,800,822,832,1012,1266,1495,1499,1500,1937,1982,2017,2023,3069,3312,3646,3655,3688,3728,3799,3895,3927,4430,4627,5052,5214,5339,5499,5861,5901,5962,6128,6130,6138,6152,6159,6187,6282,6624,6709,7414,7458,7529,7531,8301,8407,8615,8826,9230,9588,9689,10890,22919,23367,23499,23513,23647,27044,28988,51100,51474,55379,57142,64855,79026,85377,90102,128866	ADD1,ANXA1,ANXA2,ARHGAP1,BSG,CALD1,CAPG,CAPZB,CDH13,CNN3,CTNNA1,CTNNB1,CTNND1,EEF1G,EIF4G2,CTTN,ENO1,HDLBP,HSPA8,EIF3E,ITGA6,ITGB1,JUP,KIF5B,KTN1,LASP1,MYO1B,MYH9,PRDX1,PFKP,PLEC,PPP1CA,RAB1A,RAN,RDX,RPL6,RPL7A,RPL15,RPL24,RPL29,RPS2,S100A11,FSCN1,SPTAN1,VCL,EIF4H,YWHAB,YWHAE,PICALM,TAGLN2,USO1,IQGAP1,RAB11B,PRDX6,BZW1,RAB10,MAPRE1,LARP1,MACF1,SCRIB,ARFIP2,SND1,DBNL,SH3GLB1,LIMA1,LRRC59,RTN4,FAM1…
4_Summary	GO Biological Processes	GO:0045055	regulated exocytosis	-34.0325	-31.0888	107/792	29,81,101,302,308,334,351,411,427,488,527,567,960,965,1075,1191,1508,1509,1512,1520,1522,1650,1727,1778,1855,1915,2335,2665,2760,2771,2821,2934,2990,3074,3162,3312,3320,3608,3685,3728,3837,3916,3920,4282,4851,5217,5611,5689,5695,5707,5708,5709,5713,5719,5768,5806,5836,5879,6093,6282,6386,6678,6709,7043,7077,7078,7130,7277,7414,7415,7422,7873,7879,8407,8573,8804,8826,9230,9588,9948,9961,10092,1009…	ABR,ACTN4,ADAM8,ANXA2,ANXA5,APLP2,APP,ARSB,ASAH1,ATP2A2,ATP6V0C,B2M,CD44,CD58,CTSC,CLU,CTSB,CTSD,CTSH,CTSS,CTSZ,DDOST,CYB5R3,DYNC1H1,DVL1,EEF1A1,FN1,GDI2,GM2A,GNAI2,GPI,GSN,GUSB,HEXB,HMOX1,HSPA8,HSP90AA1,ILF2,ITGAV,JUP,KPNB1,LAMP1,LAMP2,MIF,NOTCH1,PFN2,DNAJC3,PSMB1,PSMB7,PSMD1,PSMD2,PSMD3,PSMD7,PSMD13,QSOX1,PTX3,PYGL,RAC1,ROCK1,S100A11,SDCBP,SPARC,SPTAN1,TGFB3,TIMP2,TIMP3,TNFAIP6,TUBA4A,VCL,VCP,V…
4_Member	GO Biological Processes	GO:0045055	regulated exocytosis	-34.0325	-31.0888	107/792	29,81,101,302,308,334,351,411,427,488,527,567,960,965,1075,1191,1508,1509,1512,1520,1522,1650,1727,1778,1855,1915,2335,2665,2760,2771,2821,2934,2990,3074,3162,3312,3320,3608,3685,3728,3837,3916,3920,4282,4851,5217,5611,5689,5695,5707,5708,5709,5713,5719,5768,5806,5836,5879,6093,6282,6386,6678,6709,7043,7077,7078,7130,7277,7414,7415,7422,7873,7879,8407,8573,8804,8826,9230,9588,9948,9961,10092,1009…	ABR,ACTN4,ADAM8,ANXA2,ANXA5,APLP2,APP,ARSB,ASAH1,ATP2A2,ATP6V0C,B2M,CD44,CD58,CTSC,CLU,CTSB,CTSD,CTSH,CTSS,CTSZ,DDOST,CYB5R3,DYNC1H1,DVL1,EEF1A1,FN1,GDI2,GM2A,GNAI2,GPI,GSN,GUSB,HEXB,HMOX1,HSPA8,HSP90AA1,ILF2,ITGAV,JUP,KPNB1,LAMP1,LAMP2,MIF,NOTCH1,PFN2,DNAJC3,PSMB1,PSMB7,PSMD1,PSMD2,PSMD3,PSMD7,PSMD13,QSOX1,PTX3,PYGL,RAC1,ROCK1,S100A11,SDCBP,SPARC,SPTAN1,TGFB3,TIMP2,TIMP3,TNFAIP6,TUBA4A,VCL,VCP,V…
4_Member	GO Biological Processes	GO:0043312	neutrophil degranulation	-30.5219	-27.7072	79/486	29,101,302,411,427,527,567,960,965,1075,1508,1509,1512,1520,1522,1650,1727,1778,1915,2665,2760,2821,2934,2990,3074,3312,3320,3608,3685,3728,3837,3916,3920,4282,5611,5689,5695,5707,5708,5709,5713,5719,5768,5806,5836,5879,6093,6282,6386,6709,7077,7130,7414,7415,7879,8804,8826,9588,9961,10092,10097,10159,10487,10549,10577,10855,10857,10890,11333,22931,23352,23406,28988,51552,51646,54472,57153,84061,…	ABR,ADAM8,ANXA2,ARSB,ASAH1,ATP6V0C,B2M,CD44,CD58,CTSC,CTSB,CTSD,CTSH,CTSS,CTSZ,DDOST,CYB5R3,DYNC1H1,EEF1A1,GDI2,GM2A,GPI,GSN,GUSB,HEXB,HSPA8,HSP90AA1,ILF2,ITGAV,JUP,KPNB1,LAMP1,LAMP2,MIF,DNAJC3,PSMB1,PSMB7,PSMD1,PSMD2,PSMD3,PSMD7,PSMD13,QSOX1,PTX3,PYGL,RAC1,ROCK1,S100A11,SDCBP,SPTAN1,TIMP2,TNFAIP6,VCL,VCP,RAB7A,CREG1,IQGAP1,PRDX6,MVP,ARPC5,ACTR2,ATP6AP2,CAP1,PRDX4,NPC2,HPSE,PGRMC1,RAB10,PDAP1,RAB…
4_Member	GO Biological Processes	GO:0002446	neutrophil mediated immunity	-30.4193	-27.6169	80/500	29,101,302,411,427,527,567,960,965,1075,1508,1509,1512,1520,1522,1650,1727,1778,1915,2665,2760,2821,2934,2990,3074,3312,3320,3608,3685,3728,3837,3916,3920,4282,5611,5689,5695,5707,5708,5709,5713,5719,5768,5806,5836,5879,6093,6282,6386,6709,7077,7130,7414,7415,7879,8804,8826,9588,9948,9961,10092,10097,10159,10487,10549,10577,10855,10857,10890,11333,22931,23352,23406,28988,51552,51646,54472,57153,8…	ABR,ADAM8,ANXA2,ARSB,ASAH1,ATP6V0C,B2M,CD44,CD58,CTSC,CTSB,CTSD,CTSH,CTSS,CTSZ,DDOST,CYB5R3,DYNC1H1,EEF1A1,GDI2,GM2A,GPI,GSN,GUSB,HEXB,HSPA8,HSP90AA1,ILF2,ITGAV,JUP,KPNB1,LAMP1,LAMP2,MIF,DNAJC3,PSMB1,PSMB7,PSMD1,PSMD2,PSMD3,PSMD7,PSMD13,QSOX1,PTX3,PYGL,RAC1,ROCK1,S100A11,SDCBP,SPTAN1,TIMP2,TNFAIP6,VCL,VCP,RAB7A,CREG1,IQGAP1,PRDX6,WDR1,MVP,ARPC5,ACTR2,ATP6AP2,CAP1,PRDX4,NPC2,HPSE,PGRMC1,RAB10,PDAP…
4_Member	GO Biological Processes	GO:0002283	neutrophil activation involved in immune response	-30.333	-27.5425	79/489	29,101,302,411,427,527,567,960,965,1075,1508,1509,1512,1520,1522,1650,1727,1778,1915,2665,2760,2821,2934,2990,3074,3312,3320,3608,3685,3728,3837,3916,3920,4282,5611,5689,5695,5707,5708,5709,5713,5719,5768,5806,5836,5879,6093,6282,6386,6709,7077,7130,7414,7415,7879,8804,8826,9588,9961,10092,10097,10159,10487,10549,10577,10855,10857,10890,11333,22931,23352,23406,28988,51552,51646,54472,57153,84061,…	ABR,ADAM8,ANXA2,ARSB,ASAH1,ATP6V0C,B2M,CD44,CD58,CTSC,CTSB,CTSD,CTSH,CTSS,CTSZ,DDOST,CYB5R3,DYNC1H1,EEF1A1,GDI2,GM2A,GPI,GSN,GUSB,HEXB,HSPA8,HSP90AA1,ILF2,ITGAV,JUP,KPNB1,LAMP1,LAMP2,MIF,DNAJC3,PSMB1,PSMB7,PSMD1,PSMD2,PSMD3,PSMD7,PSMD13,QSOX1,PTX3,PYGL,RAC1,ROCK1,S100A11,SDCBP,SPTAN1,TIMP2,TNFAIP6,VCL,VCP,RAB7A,CREG1,IQGAP1,PRDX6,MVP,ARPC5,ACTR2,ATP6AP2,CAP1,PRDX4,NPC2,HPSE,PGRMC1,RAB10,PDAP1,RAB…
4_Member	GO Biological Processes	GO:0042119	neutrophil activation	-29.6537	-26.8747	79/500	29,101,302,411,427,527,567,960,965,1075,1508,1509,1512,1520,1522,1650,1727,1778,1915,2665,2760,2821,2934,2990,3074,3312,3320,3608,3685,3728,3837,3916,3920,4282,5611,5689,5695,5707,5708,5709,5713,5719,5768,5806,5836,5879,6093,6282,6386,6709,7077,7130,7414,7415,7879,8804,8826,9588,9961,10092,10097,10159,10487,10549,10577,10855,10857,10890,11333,22931,23352,23406,28988,51552,51646,54472,57153,84061,…	ABR,ADAM8,ANXA2,ARSB,ASAH1,ATP6V0C,B2M,CD44,CD58,CTSC,CTSB,CTSD,CTSH,CTSS,CTSZ,DDOST,CYB5R3,DYNC1H1,EEF1A1,GDI2,GM2A,GPI,GSN,GUSB,HEXB,HSPA8,HSP90AA1,ILF2,ITGAV,JUP,KPNB1,LAMP1,LAMP2,MIF,DNAJC3,PSMB1,PSMB7,PSMD1,PSMD2,PSMD3,PSMD7,PSMD13,QSOX1,PTX3,PYGL,RAC1,ROCK1,S100A11,SDCBP,SPTAN1,TIMP2,TNFAIP6,VCL,VCP,RAB7A,CREG1,IQGAP1,PRDX6,MVP,ARPC5,ACTR2,ATP6AP2,CAP1,PRDX4,NPC2,HPSE,PGRMC1,RAB10,PDAP1,RAB…
4_Member	GO Biological Processes	GO:0036230	granulocyte activation	-29.2915	-26.5239	79/506	29,101,302,411,427,527,567,960,965,1075,1508,1509,1512,1520,1522,1650,1727,1778,1915,2665,2760,2821,2934,2990,3074,3312,3320,3608,3685,3728,3837,3916,3920,4282,5611,5689,5695,5707,5708,5709,5713,5719,5768,5806,5836,5879,6093,6282,6386,6709,7077,7130,7414,7415,7879,8804,8826,9588,9961,10092,10097,10159,10487,10549,10577,10855,10857,10890,11333,22931,23352,23406,28988,51552,51646,54472,57153,84061,…	ABR,ADAM8,ANXA2,ARSB,ASAH1,ATP6V0C,B2M,CD44,CD58,CTSC,CTSB,CTSD,CTSH,CTSS,CTSZ,DDOST,CYB5R3,DYNC1H1,EEF1A1,GDI2,GM2A,GPI,GSN,GUSB,HEXB,HSPA8,HSP90AA1,ILF2,ITGAV,JUP,KPNB1,LAMP1,LAMP2,MIF,DNAJC3,PSMB1,PSMB7,PSMD1,PSMD2,PSMD3,PSMD7,PSMD13,QSOX1,PTX3,PYGL,RAC1,ROCK1,S100A11,SDCBP,SPTAN1,TIMP2,TNFAIP6,VCL,VCP,RAB7A,CREG1,IQGAP1,PRDX6,MVP,ARPC5,ACTR2,ATP6AP2,CAP1,PRDX4,NPC2,HPSE,PGRMC1,RAB10,PDAP1,RAB…
4_Member	GO Biological Processes	GO:0002263	cell activation involved in immune response	-29.2671	-26.5105	94/707	25,29,101,301,302,351,411,427,527,567,960,965,1075,1508,1509,1512,1520,1522,1650,1727,1778,1915,2665,2760,2821,2934,2990,3074,3162,3312,3320,3608,3685,3728,3837,3916,3920,4035,4282,4853,5611,5689,5695,5707,5708,5709,5713,5719,5768,5806,5836,5879,5914,6093,6282,6386,6709,6774,6778,6830,7077,7130,7414,7415,7879,8729,8804,8826,9452,9588,9961,10092,10097,10159,10487,10549,10577,10855,10857,10890,1133…	ABL1,ABR,ADAM8,ANXA1,ANXA2,APP,ARSB,ASAH1,ATP6V0C,B2M,CD44,CD58,CTSC,CTSB,CTSD,CTSH,CTSS,CTSZ,DDOST,CYB5R3,DYNC1H1,EEF1A1,GDI2,GM2A,GPI,GSN,GUSB,HEXB,HMOX1,HSPA8,HSP90AA1,ILF2,ITGAV,JUP,KPNB1,LAMP1,LAMP2,LRP1,MIF,NOTCH2,DNAJC3,PSMB1,PSMB7,PSMD1,PSMD2,PSMD3,PSMD7,PSMD13,QSOX1,PTX3,PYGL,RAC1,RARA,ROCK1,S100A11,SDCBP,SPTAN1,STAT3,STAT6,SUPT6H,TIMP2,TNFAIP6,VCL,VCP,RAB7A,GBF1,CREG1,IQGAP1,ITM2A,PRDX6…
4_Member	GO Biological Processes	GO:0043299	leukocyte degranulation	-29.0869	-26.341	81/535	29,101,302,411,427,527,567,960,965,1075,1508,1509,1512,1520,1522,1650,1727,1778,1915,2665,2760,2821,2934,2990,3074,3162,3312,3320,3608,3685,3728,3837,3916,3920,4282,5611,5689,5695,5707,5708,5709,5713,5719,5768,5806,5836,5879,6093,6282,6386,6709,7077,7130,7414,7415,7879,8804,8826,9588,9961,10092,10097,10159,10487,10549,10577,10855,10857,10890,11333,22931,23352,23406,28988,51552,51646,54472,57153,5…	ABR,ADAM8,ANXA2,ARSB,ASAH1,ATP6V0C,B2M,CD44,CD58,CTSC,CTSB,CTSD,CTSH,CTSS,CTSZ,DDOST,CYB5R3,DYNC1H1,EEF1A1,GDI2,GM2A,GPI,GSN,GUSB,HEXB,HMOX1,HSPA8,HSP90AA1,ILF2,ITGAV,JUP,KPNB1,LAMP1,LAMP2,MIF,DNAJC3,PSMB1,PSMB7,PSMD1,PSMD2,PSMD3,PSMD7,PSMD13,QSOX1,PTX3,PYGL,RAC1,ROCK1,S100A11,SDCBP,SPTAN1,TIMP2,TNFAIP6,VCL,VCP,RAB7A,CREG1,IQGAP1,PRDX6,MVP,ARPC5,ACTR2,ATP6AP2,CAP1,PRDX4,NPC2,HPSE,PGRMC1,RAB10,PDA…
4_Member	GO Biological Processes	GO:0002444	myeloid leukocyte mediated immunity	-28.8022	-26.0668	82/553	29,101,302,411,427,527,567,960,965,1075,1508,1509,1512,1520,1522,1650,1727,1778,1915,2665,2760,2821,2934,2990,3074,3162,3312,3320,3608,3685,3728,3837,3916,3920,4282,5611,5689,5695,5707,5708,5709,5713,5719,5768,5806,5836,5879,6093,6282,6386,6709,7077,7130,7414,7415,7879,8804,8826,9588,9948,9961,10092,10097,10159,10487,10549,10577,10855,10857,10890,11333,22931,23352,23406,28988,51552,51646,54472,57…	ABR,ADAM8,ANXA2,ARSB,ASAH1,ATP6V0C,B2M,CD44,CD58,CTSC,CTSB,CTSD,CTSH,CTSS,CTSZ,DDOST,CYB5R3,DYNC1H1,EEF1A1,GDI2,GM2A,GPI,GSN,GUSB,HEXB,HMOX1,HSPA8,HSP90AA1,ILF2,ITGAV,JUP,KPNB1,LAMP1,LAMP2,MIF,DNAJC3,PSMB1,PSMB7,PSMD1,PSMD2,PSMD3,PSMD7,PSMD13,QSOX1,PTX3,PYGL,RAC1,ROCK1,S100A11,SDCBP,SPTAN1,TIMP2,TNFAIP6,VCL,VCP,RAB7A,CREG1,IQGAP1,PRDX6,WDR1,MVP,ARPC5,ACTR2,ATP6AP2,CAP1,PRDX4,NPC2,HPSE,PGRMC1,RAB1…
4_Member	GO Cellular Components	GO:0060205	cytoplasmic vesicle lumen	-28.6193	-25.9041	64/338	81,302,351,411,567,1075,1191,1509,1512,1522,1727,1778,1915,2335,2665,2760,2821,2934,2990,3074,3312,3320,3608,3728,3837,4282,5611,5689,5695,5707,5708,5709,5713,5719,5768,5806,5836,6093,6282,6386,6678,6709,7043,7077,7078,7184,7414,7415,7422,8804,9588,9961,10092,10097,10447,10487,10525,10549,10577,10855,23406,28988,54472,203068	ACTN4,ANXA2,APP,ARSB,B2M,CTSC,CLU,CTSD,CTSH,CTSZ,CYB5R3,DYNC1H1,EEF1A1,FN1,GDI2,GM2A,GPI,GSN,GUSB,HEXB,HSPA8,HSP90AA1,ILF2,JUP,KPNB1,MIF,DNAJC3,PSMB1,PSMB7,PSMD1,PSMD2,PSMD3,PSMD7,PSMD13,QSOX1,PTX3,PYGL,ROCK1,S100A11,SDCBP,SPARC,SPTAN1,TGFB3,TIMP2,TIMP3,HSP90B1,VCL,VCP,VEGFA,CREG1,PRDX6,MVP,ARPC5,ACTR2,FAM3C,CAP1,HYOU1,PRDX4,NPC2,HPSE,COTL1,DBNL,TOLLIP,TUBB
4_Member	GO Biological Processes	GO:0002275	myeloid cell activation involved in immune response	-28.5754	-25.8699	81/544	29,101,302,411,427,527,567,960,965,1075,1508,1509,1512,1520,1522,1650,1727,1778,1915,2665,2760,2821,2934,2990,3074,3162,3312,3320,3608,3685,3728,3837,3916,3920,4282,5611,5689,5695,5707,5708,5709,5713,5719,5768,5806,5836,5879,6093,6282,6386,6709,7077,7130,7414,7415,7879,8804,8826,9588,9961,10092,10097,10159,10487,10549,10577,10855,10857,10890,11333,22931,23352,23406,28988,51552,51646,54472,57153,5…	ABR,ADAM8,ANXA2,ARSB,ASAH1,ATP6V0C,B2M,CD44,CD58,CTSC,CTSB,CTSD,CTSH,CTSS,CTSZ,DDOST,CYB5R3,DYNC1H1,EEF1A1,GDI2,GM2A,GPI,GSN,GUSB,HEXB,HMOX1,HSPA8,HSP90AA1,ILF2,ITGAV,JUP,KPNB1,LAMP1,LAMP2,MIF,DNAJC3,PSMB1,PSMB7,PSMD1,PSMD2,PSMD3,PSMD7,PSMD13,QSOX1,PTX3,PYGL,RAC1,ROCK1,S100A11,SDCBP,SPTAN1,TIMP2,TNFAIP6,VCL,VCP,RAB7A,CREG1,IQGAP1,PRDX6,MVP,ARPC5,ACTR2,ATP6AP2,CAP1,PRDX4,NPC2,HPSE,PGRMC1,RAB10,PDA…
4_Member	GO Cellular Components	GO:0031983	vesicle lumen	-28.5424	-25.8464	64/339	81,302,351,411,567,1075,1191,1509,1512,1522,1727,1778,1915,2335,2665,2760,2821,2934,2990,3074,3312,3320,3608,3728,3837,4282,5611,5689,5695,5707,5708,5709,5713,5719,5768,5806,5836,6093,6282,6386,6678,6709,7043,7077,7078,7184,7414,7415,7422,8804,9588,9961,10092,10097,10447,10487,10525,10549,10577,10855,23406,28988,54472,203068	ACTN4,ANXA2,APP,ARSB,B2M,CTSC,CLU,CTSD,CTSH,CTSZ,CYB5R3,DYNC1H1,EEF1A1,FN1,GDI2,GM2A,GPI,GSN,GUSB,HEXB,HSPA8,HSP90AA1,ILF2,JUP,KPNB1,MIF,DNAJC3,PSMB1,PSMB7,PSMD1,PSMD2,PSMD3,PSMD7,PSMD13,QSOX1,PTX3,PYGL,ROCK1,S100A11,SDCBP,SPARC,SPTAN1,TGFB3,TIMP2,TIMP3,HSP90B1,VCL,VCP,VEGFA,CREG1,PRDX6,MVP,ARPC5,ACTR2,FAM3C,CAP1,HYOU1,PRDX4,NPC2,HPSE,COTL1,DBNL,TOLLIP,TUBB
4_Member	GO Cellular Components	GO:0034774	secretory granule lumen	-28.2338	-25.5563	62/321	81,302,351,411,567,1075,1191,1509,1512,1522,1727,1778,1915,2335,2665,2760,2821,2934,2990,3074,3312,3320,3608,3728,3837,4282,5611,5689,5695,5707,5708,5709,5713,5719,5768,5806,5836,6093,6282,6386,6678,6709,7043,7077,7078,7414,7415,7422,8804,9588,9961,10092,10097,10447,10487,10549,10577,10855,23406,28988,54472,203068	ACTN4,ANXA2,APP,ARSB,B2M,CTSC,CLU,CTSD,CTSH,CTSZ,CYB5R3,DYNC1H1,EEF1A1,FN1,GDI2,GM2A,GPI,GSN,GUSB,HEXB,HSPA8,HSP90AA1,ILF2,JUP,KPNB1,MIF,DNAJC3,PSMB1,PSMB7,PSMD1,PSMD2,PSMD3,PSMD7,PSMD13,QSOX1,PTX3,PYGL,ROCK1,S100A11,SDCBP,SPARC,SPTAN1,TGFB3,TIMP2,TIMP3,VCL,VCP,VEGFA,CREG1,PRDX6,MVP,ARPC5,ACTR2,FAM3C,CAP1,PRDX4,NPC2,HPSE,COTL1,DBNL,TOLLIP,TUBB
4_Member	GO Cellular Components	GO:0005775	vacuolar lumen	-27.5968	-24.9456	46/171	302,411,427,972,1075,1200,1462,1508,1509,1513,1520,1634,1727,1778,2239,2665,2719,2760,2990,3073,3074,3312,3320,3339,3920,3988,4060,5549,5611,5641,5707,6382,6383,6385,6386,6948,7415,8804,9588,10097,10487,10577,10855,54472,196463,203068	ANXA2,ARSB,ASAH1,CD74,CTSC,TPP1,VCAN,CTSB,CTSD,CTSK,CTSS,DCN,CYB5R3,DYNC1H1,GPC4,GDI2,GPC3,GM2A,GUSB,HEXA,HEXB,HSPA8,HSP90AA1,HSPG2,LAMP2,LIPA,LUM,PRELP,DNAJC3,LGMN,PSMD1,SDC1,SDC2,SDC4,SDCBP,TCN2,VCP,CREG1,PRDX6,ACTR2,CAP1,NPC2,HPSE,TOLLIP,PLBD2,TUBB
4_Member	GO Biological Processes	GO:0002366	leukocyte activation involved in immune response	-27.4408	-24.7981	91/703	25,29,101,301,302,411,427,527,567,960,965,1075,1508,1509,1512,1520,1522,1650,1727,1778,1915,2665,2760,2821,2934,2990,3074,3162,3312,3320,3608,3685,3728,3837,3916,3920,4282,4853,5611,5689,5695,5707,5708,5709,5713,5719,5768,5806,5836,5879,5914,6093,6282,6386,6709,6774,6778,6830,7077,7130,7414,7415,7879,8804,8826,9452,9588,9961,10092,10097,10159,10487,10549,10577,10855,10857,10890,11333,22931,23352,…	ABL1,ABR,ADAM8,ANXA1,ANXA2,ARSB,ASAH1,ATP6V0C,B2M,CD44,CD58,CTSC,CTSB,CTSD,CTSH,CTSS,CTSZ,DDOST,CYB5R3,DYNC1H1,EEF1A1,GDI2,GM2A,GPI,GSN,GUSB,HEXB,HMOX1,HSPA8,HSP90AA1,ILF2,ITGAV,JUP,KPNB1,LAMP1,LAMP2,MIF,NOTCH2,DNAJC3,PSMB1,PSMB7,PSMD1,PSMD2,PSMD3,PSMD7,PSMD13,QSOX1,PTX3,PYGL,RAC1,RARA,ROCK1,S100A11,SDCBP,SPTAN1,STAT3,STAT6,SUPT6H,TIMP2,TNFAIP6,VCL,VCP,RAB7A,CREG1,IQGAP1,ITM2A,PRDX6,MVP,ARPC5,ACT…
4_Member	GO Biological Processes	GO:0002274	myeloid leukocyte activation	-26.5001	-23.8973	86/652	29,101,302,351,411,427,527,567,960,965,972,1075,1191,1508,1509,1512,1520,1522,1650,1727,1778,1915,2665,2760,2821,2934,2990,3074,3162,3312,3320,3608,3685,3725,3728,3837,3916,3920,4282,5611,5689,5695,5707,5708,5709,5713,5719,5768,5806,5836,5879,6093,6282,6386,6709,7077,7130,7414,7415,7879,8804,8826,9588,9961,10092,10097,10159,10487,10549,10577,10855,10857,10890,11333,22931,23352,23406,28988,51552,5…	ABR,ADAM8,ANXA2,APP,ARSB,ASAH1,ATP6V0C,B2M,CD44,CD58,CD74,CTSC,CLU,CTSB,CTSD,CTSH,CTSS,CTSZ,DDOST,CYB5R3,DYNC1H1,EEF1A1,GDI2,GM2A,GPI,GSN,GUSB,HEXB,HMOX1,HSPA8,HSP90AA1,ILF2,ITGAV,JUN,JUP,KPNB1,LAMP1,LAMP2,MIF,DNAJC3,PSMB1,PSMB7,PSMD1,PSMD2,PSMD3,PSMD7,PSMD13,QSOX1,PTX3,PYGL,RAC1,ROCK1,S100A11,SDCBP,SPTAN1,TIMP2,TNFAIP6,VCL,VCP,RAB7A,CREG1,IQGAP1,PRDX6,MVP,ARPC5,ACTR2,ATP6AP2,CAP1,PRDX4,NPC2,HPSE…
4_Member	GO Cellular Components	GO:0044437	vacuolar part	-24.8801	-22.3067	77/560	163,302,309,411,427,526,527,972,1075,1173,1186,1200,1211,1213,1291,1462,1508,1509,1513,1520,1634,1650,1727,1778,1915,2239,2665,2719,2760,2782,2990,3073,3074,3312,3320,3339,3916,3920,3988,4035,4060,4891,5549,5611,5641,5707,5862,6185,6382,6383,6385,6386,6396,6948,7415,7529,7879,8763,8804,9114,9588,9741,10097,10487,10577,10855,51100,51552,54472,55207,57153,79026,81671,84061,84888,196463,203068	AP2B1,ANXA2,ANXA6,ARSB,ASAH1,ATP6V1B2,ATP6V0C,CD74,CTSC,AP2M1,CLCN7,TPP1,CLTA,CLTC,COL6A1,VCAN,CTSB,CTSD,CTSK,CTSS,DCN,DDOST,CYB5R3,DYNC1H1,EEF1A1,GPC4,GDI2,GPC3,GM2A,GNB1,GUSB,HEXA,HEXB,HSPA8,HSP90AA1,HSPG2,LAMP1,LAMP2,LIPA,LRP1,LUM,SLC11A2,PRELP,DNAJC3,LGMN,PSMD1,RAB2A,RPN2,SDC1,SDC2,SDC4,SDCBP,SEC13,TCN2,VCP,YWHAB,RAB7A,CD164,CREG1,ATP6V0D1,PRDX6,LAPTM4A,ACTR2,CAP1,NPC2,HPSE,SH3GLB1,RAB14,TOLL…
4_Member	GO Cellular Components	GO:0101002	ficolin-1-rich granule	-24.0145	-21.4687	44/185	101,411,427,527,965,1508,1509,1512,1520,1522,1915,2821,2934,2990,3312,3320,3608,3728,3837,3916,3920,4282,5689,5695,5708,5709,5713,5719,5836,5879,7077,7130,7414,7415,9961,10092,10097,10159,10549,11333,23352,23406,28988,51646	ADAM8,ARSB,ASAH1,ATP6V0C,CD58,CTSB,CTSD,CTSH,CTSS,CTSZ,EEF1A1,GPI,GSN,GUSB,HSPA8,HSP90AA1,ILF2,JUP,KPNB1,LAMP1,LAMP2,MIF,PSMB1,PSMB7,PSMD2,PSMD3,PSMD7,PSMD13,PYGL,RAC1,TIMP2,TNFAIP6,VCL,VCP,MVP,ARPC5,ACTR2,ATP6AP2,PRDX4,PDAP1,UBR4,COTL1,DBNL,YPEL5
4_Member	GO Cellular Components	GO:1904813	ficolin-1-rich granule lumen	-22.9641	-20.4249	36/124	411,427,1508,1509,1512,1520,1522,1915,2821,2934,2990,3312,3320,3608,3728,3837,4282,5689,5695,5708,5709,5713,5719,5836,7077,7130,7414,7415,9961,10092,10097,10549,11333,23406,28988,51646	ARSB,ASAH1,CTSB,CTSD,CTSH,CTSS,CTSZ,EEF1A1,GPI,GSN,GUSB,HSPA8,HSP90AA1,ILF2,JUP,KPNB1,MIF,PSMB1,PSMB7,PSMD2,PSMD3,PSMD7,PSMD13,PYGL,TIMP2,TNFAIP6,VCL,VCP,MVP,ARPC5,ACTR2,PRDX4,PDAP1,COTL1,DBNL,YPEL5
4_Member	GO Cellular Components	GO:0005764	lysosome	-22.1971	-19.6709	81/676	101,163,301,302,309,411,427,526,527,972,1075,1173,1186,1200,1211,1213,1291,1462,1508,1509,1512,1513,1520,1522,1634,1650,1727,1778,1915,2239,2665,2719,2760,2782,2990,3073,3074,3312,3320,3339,3916,3920,3988,4035,4060,4668,4891,5549,5611,5641,5707,5862,6382,6383,6385,6386,6396,6948,7415,7879,8078,8763,8804,8878,9114,9146,9588,9741,10097,10487,10577,10855,51552,54472,55207,57153,79026,84061,84888,196…	ADAM8,AP2B1,ANXA1,ANXA2,ANXA6,ARSB,ASAH1,ATP6V1B2,ATP6V0C,CD74,CTSC,AP2M1,CLCN7,TPP1,CLTA,CLTC,COL6A1,VCAN,CTSB,CTSD,CTSH,CTSK,CTSS,CTSZ,DCN,DDOST,CYB5R3,DYNC1H1,EEF1A1,GPC4,GDI2,GPC3,GM2A,GNB1,GUSB,HEXA,HEXB,HSPA8,HSP90AA1,HSPG2,LAMP1,LAMP2,LIPA,LRP1,LUM,NAGA,SLC11A2,PRELP,DNAJC3,LGMN,PSMD1,RAB2A,SDC1,SDC2,SDC4,SDCBP,SEC13,TCN2,VCP,RAB7A,USP5,CD164,CREG1,SQSTM1,ATP6V0D1,HGS,PRDX6,LAPTM4A,ACTR2,C…
4_Member	GO Cellular Components	GO:0000323	lytic vacuole	-22.1556	-19.6357	81/677	101,163,301,302,309,411,427,526,527,972,1075,1173,1186,1200,1211,1213,1291,1462,1508,1509,1512,1513,1520,1522,1634,1650,1727,1778,1915,2239,2665,2719,2760,2782,2990,3073,3074,3312,3320,3339,3916,3920,3988,4035,4060,4668,4891,5549,5611,5641,5707,5862,6382,6383,6385,6386,6396,6948,7415,7879,8078,8763,8804,8878,9114,9146,9588,9741,10097,10487,10577,10855,51552,54472,55207,57153,79026,84061,84888,196…	ADAM8,AP2B1,ANXA1,ANXA2,ANXA6,ARSB,ASAH1,ATP6V1B2,ATP6V0C,CD74,CTSC,AP2M1,CLCN7,TPP1,CLTA,CLTC,COL6A1,VCAN,CTSB,CTSD,CTSH,CTSK,CTSS,CTSZ,DCN,DDOST,CYB5R3,DYNC1H1,EEF1A1,GPC4,GDI2,GPC3,GM2A,GNB1,GUSB,HEXA,HEXB,HSPA8,HSP90AA1,HSPG2,LAMP1,LAMP2,LIPA,LRP1,LUM,NAGA,SLC11A2,PRELP,DNAJC3,LGMN,PSMD1,RAB2A,SDC1,SDC2,SDC4,SDCBP,SEC13,TCN2,VCP,RAB7A,USP5,CD164,CREG1,SQSTM1,ATP6V0D1,HGS,PRDX6,LAPTM4A,ACTR2,C…
4_Member	GO Cellular Components	GO:0043202	lysosomal lumen	-21.7174	-19.2099	31/94	411,427,972,1200,1462,1508,1509,1513,1520,1634,2239,2719,2760,2990,3073,3074,3312,3320,3339,3920,3988,4060,5549,5641,6382,6383,6385,6948,10577,10855,196463	ARSB,ASAH1,CD74,TPP1,VCAN,CTSB,CTSD,CTSK,CTSS,DCN,GPC4,GPC3,GM2A,GUSB,HEXA,HEXB,HSPA8,HSP90AA1,HSPG2,LAMP2,LIPA,LUM,PRELP,LGMN,SDC1,SDC2,SDC4,TCN2,NPC2,HPSE,PLBD2
4_Member	GO Cellular Components	GO:0005773	vacuole	-20.9189	-18.4235	85/770	101,163,301,302,309,411,427,526,527,972,1075,1173,1186,1200,1211,1213,1291,1462,1508,1509,1512,1513,1520,1522,1634,1650,1727,1778,1915,2239,2665,2719,2760,2782,2990,3073,3074,3312,3320,3339,3916,3920,3988,4035,4060,4668,4891,5549,5611,5641,5707,5862,6185,6382,6383,6385,6386,6396,6948,7415,7529,7879,8078,8763,8804,8878,9114,9146,9588,9741,10097,10487,10577,10855,51100,51552,54472,55207,57153,79026…	ADAM8,AP2B1,ANXA1,ANXA2,ANXA6,ARSB,ASAH1,ATP6V1B2,ATP6V0C,CD74,CTSC,AP2M1,CLCN7,TPP1,CLTA,CLTC,COL6A1,VCAN,CTSB,CTSD,CTSH,CTSK,CTSS,CTSZ,DCN,DDOST,CYB5R3,DYNC1H1,EEF1A1,GPC4,GDI2,GPC3,GM2A,GNB1,GUSB,HEXA,HEXB,HSPA8,HSP90AA1,HSPG2,LAMP1,LAMP2,LIPA,LRP1,LUM,NAGA,SLC11A2,PRELP,DNAJC3,LGMN,PSMD1,RAB2A,RPN2,SDC1,SDC2,SDC4,SDCBP,SEC13,TCN2,VCP,YWHAB,RAB7A,USP5,CD164,CREG1,SQSTM1,ATP6V0D1,HGS,PRDX6,LAPT…
4_Member	KEGG Pathway	hsa04142	Lysosome	-16.8877	-14.448	30/123	411,427,527,1075,1200,1211,1212,1213,1508,1509,1512,1513,1520,1522,2760,2990,3073,3074,3916,3920,3988,4668,4891,5641,8218,8763,9114,9741,10577,26088	ARSB,ASAH1,ATP6V0C,CTSC,TPP1,CLTA,CLTB,CLTC,CTSB,CTSD,CTSH,CTSK,CTSS,CTSZ,GM2A,GUSB,HEXA,HEXB,LAMP1,LAMP2,LIPA,NAGA,SLC11A2,LGMN,CLTCL1,CD164,ATP6V0D1,LAPTM4A,NPC2,GGA1
4_Member	GO Cellular Components	GO:0035578	azurophil granule lumen	-10.5781	-8.48424	20/91	302,411,1075,1727,1778,2665,2760,2990,3074,5611,5707,6386,7415,8804,9588,10097,10487,10577,54472,203068	ANXA2,ARSB,CTSC,CYB5R3,DYNC1H1,GDI2,GM2A,GUSB,HEXB,DNAJC3,PSMD1,SDCBP,VCP,CREG1,PRDX6,ACTR2,CAP1,NPC2,TOLLIP,TUBB
4_Member	GO Cellular Components	GO:0042582	azurophil granule	-10.5684	-8.47916	26/157	302,411,527,1075,1650,1727,1778,2665,2760,2990,3073,3074,3916,3920,5611,5707,6386,7415,8804,9588,10097,10487,10577,54472,84061,203068	ANXA2,ARSB,ATP6V0C,CTSC,DDOST,CYB5R3,DYNC1H1,GDI2,GM2A,GUSB,HEXA,HEXB,LAMP1,LAMP2,DNAJC3,PSMD1,SDCBP,VCP,CREG1,PRDX6,ACTR2,CAP1,NPC2,TOLLIP,MAGT1,TUBB
4_Member	GO Cellular Components	GO:0005766	primary lysosome	-10.5684	-8.47916	26/157	302,411,527,1075,1650,1727,1778,2665,2760,2990,3073,3074,3916,3920,5611,5707,6386,7415,8804,9588,10097,10487,10577,54472,84061,203068	ANXA2,ARSB,ATP6V0C,CTSC,DDOST,CYB5R3,DYNC1H1,GDI2,GM2A,GUSB,HEXA,HEXB,LAMP1,LAMP2,DNAJC3,PSMD1,SDCBP,VCP,CREG1,PRDX6,ACTR2,CAP1,NPC2,TOLLIP,MAGT1,TUBB
5_Summary	GO Biological Processes	GO:0043062	extracellular structure organization	-28.2501	-25.5635	71/424	25,101,302,351,649,682,822,871,960,1277,1278,1284,1290,1291,1292,1293,1301,1303,1462,1490,1513,1520,1634,2191,2199,2200,2247,2335,2934,3339,3371,3655,3685,3688,3693,3912,3913,3915,4016,4017,4035,4060,4324,4851,5033,5034,5045,5351,5352,5806,6382,6385,6386,6624,6678,7077,7837,8516,10015,10549,10585,10609,10630,10631,30001,84695,90102,90993,151887,169611,285590,301,307,308,309,977,1012,1075,1191,150…	ABL1,ADAM8,ANXA2,APP,BMP1,BSG,CAPG,SERPINH1,CD44,COL1A1,COL1A2,COL4A2,COL5A2,COL6A1,COL6A2,COL6A3,COL11A1,COL12A1,VCAN,CCN2,CTSK,CTSS,DCN,FAP,FBLN2,FBN1,FGF2,FN1,GSN,HSPG2,TNC,ITGA6,ITGAV,ITGB1,ITGB5,LAMB1,LAMB2,LAMC1,LOXL1,LOXL2,LRP1,LUM,MMP15,NOTCH1,P4HA1,P4HB,FURIN,PLOD1,PLOD2,PTX3,SDC1,SDC4,SDCBP,FSCN1,SPARC,TIMP2,PXDN,ITGA8,PDCD6IP,PRDX4,POMT1,P3H4,PDPN,POSTN,ERO1A,LOXL3,PHLDB2,CREB3L1,CCDC8…
5_Member	GO Biological Processes	GO:0043062	extracellular structure organization	-28.2501	-25.5635	71/424	25,101,302,351,649,682,822,871,960,1277,1278,1284,1290,1291,1292,1293,1301,1303,1462,1490,1513,1520,1634,2191,2199,2200,2247,2335,2934,3339,3371,3655,3685,3688,3693,3912,3913,3915,4016,4017,4035,4060,4324,4851,5033,5034,5045,5351,5352,5806,6382,6385,6386,6624,6678,7077,7837,8516,10015,10549,10585,10609,10630,10631,30001,84695,90102,90993,151887,169611,285590	ABL1,ADAM8,ANXA2,APP,BMP1,BSG,CAPG,SERPINH1,CD44,COL1A1,COL1A2,COL4A2,COL5A2,COL6A1,COL6A2,COL6A3,COL11A1,COL12A1,VCAN,CCN2,CTSK,CTSS,DCN,FAP,FBLN2,FBN1,FGF2,FN1,GSN,HSPG2,TNC,ITGA6,ITGAV,ITGB1,ITGB5,LAMB1,LAMB2,LAMC1,LOXL1,LOXL2,LRP1,LUM,MMP15,NOTCH1,P4HA1,P4HB,FURIN,PLOD1,PLOD2,PTX3,SDC1,SDC4,SDCBP,FSCN1,SPARC,TIMP2,PXDN,ITGA8,PDCD6IP,PRDX4,POMT1,P3H4,PDPN,POSTN,ERO1A,LOXL3,PHLDB2,CREB3L1,CCDC8…
5_Member	GO Biological Processes	GO:0030198	extracellular matrix organization	-28.0623	-25.3938	66/368	25,101,302,351,649,682,822,871,960,1277,1278,1284,1290,1291,1292,1293,1301,1303,1462,1490,1513,1520,1634,2191,2199,2200,2247,2335,2934,3339,3371,3655,3685,3688,3693,3912,3913,3915,4016,4017,4035,4060,4324,4851,5033,5045,5351,5352,5806,6624,6678,7077,7837,8516,10549,10585,10609,10630,10631,30001,84695,90102,90993,151887,169611,285590	ABL1,ADAM8,ANXA2,APP,BMP1,BSG,CAPG,SERPINH1,CD44,COL1A1,COL1A2,COL4A2,COL5A2,COL6A1,COL6A2,COL6A3,COL11A1,COL12A1,VCAN,CCN2,CTSK,CTSS,DCN,FAP,FBLN2,FBN1,FGF2,FN1,GSN,HSPG2,TNC,ITGA6,ITGAV,ITGB1,ITGB5,LAMB1,LAMB2,LAMC1,LOXL1,LOXL2,LRP1,LUM,MMP15,NOTCH1,P4HA1,FURIN,PLOD1,PLOD2,PTX3,FSCN1,SPARC,TIMP2,PXDN,ITGA8,PRDX4,POMT1,P3H4,PDPN,POSTN,ERO1A,LOXL3,PHLDB2,CREB3L1,CCDC80,OLFML2A,SH3PXD2B
5_Member	GO Cellular Components	GO:0062023	collagen-containing extracellular matrix	-27.0001	-24.3738	68/407	301,302,307,308,309,871,977,1012,1075,1191,1277,1278,1284,1290,1291,1292,1293,1301,1303,1462,1490,1508,1509,1512,1520,1522,1634,2199,2200,2239,2335,2719,3339,3371,3490,3655,3912,3913,3915,3998,4016,4017,4053,4054,4060,4192,4240,4670,5270,5549,6277,6383,6678,7043,7058,7077,7078,7184,7837,8573,10631,25878,27286,64175,84034,115908,151887,439921	ANXA1,ANXA2,ANXA4,ANXA5,ANXA6,SERPINH1,CD151,CDH13,CTSC,CLU,COL1A1,COL1A2,COL4A2,COL5A2,COL6A1,COL6A2,COL6A3,COL11A1,COL12A1,VCAN,CCN2,CTSB,CTSD,CTSH,CTSS,CTSZ,DCN,FBLN2,FBN1,GPC4,FN1,GPC3,HSPG2,TNC,IGFBP7,ITGA6,LAMB1,LAMB2,LAMC1,LMAN1,LOXL1,LOXL2,LTBP2,LTBP3,LUM,MDK,MFGE8,HNRNPM,SERPINE2,PRELP,S100A6,SDC2,SPARC,TGFB3,THBS2,TIMP2,TIMP3,HSP90B1,PXDN,CASK,POSTN,MXRA5,SRPX2,P3H1,EMILIN2,CTHRC1,CCDC8…
5_Member	GO Cellular Components	GO:0031012	extracellular matrix	-26.6673	-24.0568	77/526	301,302,307,308,309,871,977,1012,1075,1191,1277,1278,1284,1290,1291,1292,1293,1301,1303,1462,1490,1508,1509,1512,1520,1522,1634,2199,2200,2239,2335,2615,2719,2734,3339,3371,3490,3655,3912,3913,3915,3998,4016,4017,4053,4054,4060,4192,4240,4324,4670,5270,5549,5806,6277,6383,6678,7043,7058,7077,7078,7184,7422,7837,8573,8839,10631,10855,25878,27286,64175,84034,84894,115908,151887,169611,439921	ANXA1,ANXA2,ANXA4,ANXA5,ANXA6,SERPINH1,CD151,CDH13,CTSC,CLU,COL1A1,COL1A2,COL4A2,COL5A2,COL6A1,COL6A2,COL6A3,COL11A1,COL12A1,VCAN,CCN2,CTSB,CTSD,CTSH,CTSS,CTSZ,DCN,FBLN2,FBN1,GPC4,FN1,LRRC32,GPC3,GLG1,HSPG2,TNC,IGFBP7,ITGA6,LAMB1,LAMB2,LAMC1,LMAN1,LOXL1,LOXL2,LTBP2,LTBP3,LUM,MDK,MFGE8,MMP15,HNRNPM,SERPINE2,PRELP,PTX3,S100A6,SDC2,SPARC,TGFB3,THBS2,TIMP2,TIMP3,HSP90B1,VEGFA,PXDN,CASK,CCN5,POSTN,HPS…
5_Member	GO Molecular Functions	GO:0005201	extracellular matrix structural constituent	-15.1103	-12.7428	32/162	1277,1278,1284,1290,1291,1292,1293,1301,1303,1462,1634,2199,2200,2335,3339,3371,3490,3912,3913,3915,4053,4060,4240,5549,6678,7058,7837,10631,25878,27286,84034,115908	COL1A1,COL1A2,COL4A2,COL5A2,COL6A1,COL6A2,COL6A3,COL11A1,COL12A1,VCAN,DCN,FBLN2,FBN1,FN1,HSPG2,TNC,IGFBP7,LAMB1,LAMB2,LAMC1,LTBP2,LUM,MFGE8,PRELP,SPARC,THBS2,PXDN,POSTN,MXRA5,SRPX2,EMILIN2,CTHRC1
5_Member	GO Cellular Components	GO:0005604	basement membrane	-8.63452	-6.71197	18/93	302,977,1284,2200,2335,3339,3371,3655,3912,3913,3915,4016,4017,6678,7058,7078,8573,151887	ANXA2,CD151,COL4A2,FBN1,FN1,HSPG2,TNC,ITGA6,LAMB1,LAMB2,LAMC1,LOXL1,LOXL2,SPARC,THBS2,TIMP3,CASK,CCDC80
6_Summary	GO Biological Processes	GO:0097435	supramolecular fiber organization	-28.0005	-25.3408	89/663	25,70,71,81,118,302,351,822,830,832,871,998,1073,1191,1277,1278,1290,1301,1303,1490,1495,1778,1809,1855,2017,2885,2934,3092,3312,3611,3688,3693,3837,4017,4053,4060,4089,4193,4430,4628,4641,4739,4926,5033,5048,5217,5351,5352,5358,5573,5879,5962,6093,6385,6624,6709,7043,7139,7184,7431,7791,8766,9475,9564,9948,10092,10093,10096,10097,10109,10487,10519,10552,10609,11034,22919,25802,27063,27295,51474,…	ABL1,ACTC1,ACTG1,ACTN4,ADD1,ANXA2,APP,CAPG,CAPZA2,CAPZB,SERPINH1,CDC42,CFL2,CLU,COL1A1,COL1A2,COL5A2,COL11A1,COL12A1,CCN2,CTNNA1,DYNC1H1,DPYSL3,DVL1,CTTN,GRB2,GSN,HIP1,HSPA8,ILK,ITGB1,ITGB5,KPNB1,LOXL2,LTBP2,LUM,SMAD4,MDM2,MYO1B,MYH10,MYO1C,NEDD9,NUMA1,P4HA1,PAFAH1B1,PFN2,PLOD1,PLOD2,PLS3,PRKAR1A,RAC1,RDX,ROCK1,SDC4,FSCN1,SPTAN1,TGFB3,TNNT2,HSP90B1,VIM,ZYX,RAB11A,ROCK2,BCAR1,WDR1,ARPC5,ARPC4,ACTR…
6_Member	GO Biological Processes	GO:0097435	supramolecular fiber organization	-28.0005	-25.3408	89/663	25,70,71,81,118,302,351,822,830,832,871,998,1073,1191,1277,1278,1290,1301,1303,1490,1495,1778,1809,1855,2017,2885,2934,3092,3312,3611,3688,3693,3837,4017,4053,4060,4089,4193,4430,4628,4641,4739,4926,5033,5048,5217,5351,5352,5358,5573,5879,5962,6093,6385,6624,6709,7043,7139,7184,7431,7791,8766,9475,9564,9948,10092,10093,10096,10097,10109,10487,10519,10552,10609,11034,22919,25802,27063,27295,51474,…	ABL1,ACTC1,ACTG1,ACTN4,ADD1,ANXA2,APP,CAPG,CAPZA2,CAPZB,SERPINH1,CDC42,CFL2,CLU,COL1A1,COL1A2,COL5A2,COL11A1,COL12A1,CCN2,CTNNA1,DYNC1H1,DPYSL3,DVL1,CTTN,GRB2,GSN,HIP1,HSPA8,ILK,ITGB1,ITGB5,KPNB1,LOXL2,LTBP2,LUM,SMAD4,MDM2,MYO1B,MYH10,MYO1C,NEDD9,NUMA1,P4HA1,PAFAH1B1,PFN2,PLOD1,PLOD2,PLS3,PRKAR1A,RAC1,RDX,ROCK1,SDC4,FSCN1,SPTAN1,TGFB3,TNNT2,HSP90B1,VIM,ZYX,RAB11A,ROCK2,BCAR1,WDR1,ARPC5,ARPC4,ACTR…
6_Member	GO Cellular Components	GO:0015629	actin cytoskeleton	-27.1206	-24.4862	75/492	25,60,70,71,81,101,118,301,800,822,830,832,1073,1266,1495,1613,1809,1915,2017,2037,2275,2319,2934,3092,3611,3728,3927,4430,4627,4628,4634,4641,5358,5879,5914,5962,6513,6624,6709,7135,7139,7414,7791,8573,8826,9260,9564,9948,10015,10092,10093,10096,10097,10109,10121,10487,10552,11034,23022,23499,23603,25802,25932,27295,28988,30851,51474,51734,55362,55706,79026,79778,136319,285590,399687	ABL1,ACTB,ACTC1,ACTG1,ACTN4,ADAM8,ADD1,ANXA1,CALD1,CAPG,CAPZA2,CAPZB,CFL2,CNN3,CTNNA1,DAPK3,DPYSL3,EEF1A1,CTTN,EPB41L2,FHL3,FLOT2,GSN,HIP1,ILK,JUP,LASP1,MYO1B,MYH9,MYH10,MYL3,MYO1C,PLS3,RAC1,RARA,RDX,SLC2A1,FSCN1,SPTAN1,TNNI1,TNNT2,VCL,ZYX,CASK,IQGAP1,PDLIM7,BCAR1,WDR1,PDCD6IP,ARPC5,ARPC4,ACTR3,ACTR2,ARPC2,ACTR1A,CAP1,ARPC1A,DSTN,PALLD,MACF1,CORO1C,LMOD1,CLIC4,PDLIM3,DBNL,TAX1BP3,LIMA1,MSRB1,TMEM…
6_Member	GO Biological Processes	GO:0030029	actin filament-based process	-26.9812	-24.3628	93/742	25,29,60,70,71,81,118,301,396,397,476,822,830,832,998,1073,1266,1490,1495,1613,1809,2017,2037,2275,2314,2697,2885,2934,3092,3611,3688,3693,3728,4035,4089,4430,4627,4628,4634,4641,4739,5048,5066,5217,5358,5573,5879,5962,6093,6385,6386,6464,6624,6709,7043,7135,7139,7184,7431,7791,8394,9260,9475,9564,9826,9948,10015,10092,10093,10096,10097,10109,10487,10552,10630,11034,23022,23603,23647,25777,25802,…	ABL1,ABR,ACTB,ACTC1,ACTG1,ACTN4,ADD1,ANXA1,ARHGDIA,ARHGDIB,ATP1A1,CAPG,CAPZA2,CAPZB,CDC42,CFL2,CNN3,CCN2,CTNNA1,DAPK3,DPYSL3,CTTN,EPB41L2,FHL3,FLII,GJA1,GRB2,GSN,HIP1,ILK,ITGB1,ITGB5,JUP,LRP1,SMAD4,MYO1B,MYH9,MYH10,MYL3,MYO1C,NEDD9,PAFAH1B1,PAM,PFN2,PLS3,PRKAR1A,RAC1,RDX,ROCK1,SDC4,SDCBP,SHC1,FSCN1,SPTAN1,TGFB3,TNNI1,TNNT2,HSP90B1,VIM,ZYX,PIP5K1A,PDLIM7,ROCK2,BCAR1,ARHGEF11,WDR1,PDCD6IP,ARPC5,ARP…
6_Member	GO Biological Processes	GO:0030036	actin cytoskeleton organization	-25.9253	-23.3375	85/650	25,29,60,70,71,81,118,301,396,397,822,830,832,998,1073,1266,1490,1495,1613,1809,2017,2037,2275,2314,2885,2934,3092,3611,3688,3693,4035,4089,4430,4627,4628,4641,4739,5048,5066,5217,5358,5573,5879,5962,6093,6385,6386,6464,6624,6709,7043,7139,7184,7791,8394,9260,9475,9564,9826,9948,10015,10092,10093,10096,10097,10109,10487,10552,11034,23022,23603,23647,25802,27063,27295,51474,51734,55243,79778,81532…	ABL1,ABR,ACTB,ACTC1,ACTG1,ACTN4,ADD1,ANXA1,ARHGDIA,ARHGDIB,CAPG,CAPZA2,CAPZB,CDC42,CFL2,CNN3,CCN2,CTNNA1,DAPK3,DPYSL3,CTTN,EPB41L2,FHL3,FLII,GRB2,GSN,HIP1,ILK,ITGB1,ITGB5,LRP1,SMAD4,MYO1B,MYH9,MYH10,MYO1C,NEDD9,PAFAH1B1,PAM,PFN2,PLS3,PRKAR1A,RAC1,RDX,ROCK1,SDC4,SDCBP,SHC1,FSCN1,SPTAN1,TGFB3,TNNT2,HSP90B1,ZYX,PIP5K1A,PDLIM7,ROCK2,BCAR1,ARHGEF11,WDR1,PDCD6IP,ARPC5,ARPC4,ACTR3,ACTR2,ARPC2,CAP1,ARPC1…
6_Member	GO Biological Processes	GO:0007015	actin filament organization	-17.1176	-14.6727	54/401	25,70,81,118,822,830,832,998,1073,1490,1495,1809,2017,2885,2934,3092,3688,3693,4430,4641,4739,5217,5358,5879,5962,6093,6385,6624,6709,7043,7139,7184,7791,9475,9564,9948,10092,10093,10096,10097,10109,10487,10552,11034,25802,27295,51474,51734,55243,79778,90102,136319,256949,285590	ABL1,ACTC1,ACTN4,ADD1,CAPG,CAPZA2,CAPZB,CDC42,CFL2,CCN2,CTNNA1,DPYSL3,CTTN,GRB2,GSN,HIP1,ITGB1,ITGB5,MYO1B,MYO1C,NEDD9,PFN2,PLS3,RAC1,RDX,ROCK1,SDC4,FSCN1,SPTAN1,TGFB3,TNNT2,HSP90B1,ZYX,ROCK2,BCAR1,WDR1,ARPC5,ARPC4,ACTR3,ACTR2,ARPC2,CAP1,ARPC1A,DSTN,LMOD1,PDLIM3,LIMA1,MSRB1,KIRREL1,MICALL2,PHLDB2,MTPN,KANK3,SH3PXD2B
6_Member	GO Molecular Functions	GO:0003779	actin binding	-16.6877	-14.2635	55/424	25,81,118,309,800,822,830,832,1073,1266,1495,2037,2275,2314,2934,3092,3192,3688,3927,4430,4478,4627,4628,4634,4641,5217,5339,5358,5962,6624,6709,7135,7139,7414,9275,9948,10092,10093,10096,10097,10109,10487,10552,11034,23022,23406,23499,23603,25802,28988,51474,51734,55740,79778,399687	ABL1,ACTN4,ADD1,ANXA6,CALD1,CAPG,CAPZA2,CAPZB,CFL2,CNN3,CTNNA1,EPB41L2,FHL3,FLII,GSN,HIP1,HNRNPU,ITGB1,LASP1,MYO1B,MSN,MYH9,MYH10,MYL3,MYO1C,PFN2,PLEC,PLS3,RDX,FSCN1,SPTAN1,TNNI1,TNNT2,VCL,BCL7B,WDR1,ARPC5,ARPC4,ACTR3,ACTR2,ARPC2,CAP1,ARPC1A,DSTN,PALLD,COTL1,MACF1,CORO1C,LMOD1,DBNL,LIMA1,MSRB1,ENAH,MICALL2,MYO18A
6_Member	GO Biological Processes	GO:0010638	positive regulation of organelle organization	-15.9753	-13.5708	67/622	25,301,302,822,998,1073,1487,1490,1499,1634,1778,2017,2885,2934,3099,3181,3192,3799,3998,4000,4089,4478,4641,4926,5037,5217,5879,6382,6385,6386,6421,6591,6624,6950,7043,7203,7323,7332,7422,7529,7531,9475,9948,10015,10092,10093,10096,10097,10109,10552,10574,10971,11034,11140,11331,22919,23019,25802,26097,26993,51100,55243,57154,59286,79778,93974,285590	ABL1,ANXA1,ANXA2,CAPG,CDC42,CFL2,CTBP1,CCN2,CTNNB1,DCN,DYNC1H1,CTTN,GRB2,GSN,HK2,HNRNPA2B1,HNRNPU,KIF5B,LMAN1,LMNA,SMAD4,MSN,MYO1C,NUMA1,PEBP1,PFN2,RAC1,SDC1,SDC4,SDCBP,SFPQ,SNAI2,FSCN1,TCP1,TGFB3,CCT3,UBE2D3,UBE2L3,VEGFA,YWHAB,YWHAE,ROCK2,WDR1,PDCD6IP,ARPC5,ARPC4,ACTR3,ACTR2,ARPC2,ARPC1A,CCT7,YWHAQ,DSTN,CDC37,PHB2,MAPRE1,CNOT1,LMOD1,CHTOP,AKAP8L,SH3GLB1,KIRREL1,SMURF1,UBL5,MICALL2,ATP5IF1,SH3PXD…
6_Member	GO Biological Processes	GO:0032970	regulation of actin filament-based process	-14.5439	-12.1895	49/386	25,118,396,397,476,488,822,830,832,998,1073,1490,1613,2017,2885,2934,3611,3728,4035,4089,4627,4641,5066,5217,5879,5962,6093,6385,6624,6709,7043,7139,9475,9948,10092,10093,10096,10097,10109,10552,10630,11034,25802,51474,55243,90102,136319,256949,285590	ABL1,ADD1,ARHGDIA,ARHGDIB,ATP1A1,ATP2A2,CAPG,CAPZA2,CAPZB,CDC42,CFL2,CCN2,DAPK3,CTTN,GRB2,GSN,ILK,JUP,LRP1,SMAD4,MYH9,MYO1C,PAM,PFN2,RAC1,RDX,ROCK1,SDC4,FSCN1,SPTAN1,TGFB3,TNNT2,ROCK2,WDR1,ARPC5,ARPC4,ACTR3,ACTR2,ARPC2,ARPC1A,PDPN,DSTN,LMOD1,LIMA1,KIRREL1,PHLDB2,MTPN,KANK3,SH3PXD2B
6_Member	GO Molecular Functions	GO:0051015	actin filament binding	-13.6509	-11.3215	33/193	25,81,118,309,822,830,832,1073,1495,2314,2934,3092,3927,4430,4627,4628,4641,5358,6624,9948,10092,10093,10096,10097,10109,10552,11034,23499,23603,28988,51474,79778,399687	ABL1,ACTN4,ADD1,ANXA6,CAPG,CAPZA2,CAPZB,CFL2,CTNNA1,FLII,GSN,HIP1,LASP1,MYO1B,MYH9,MYH10,MYO1C,PLS3,FSCN1,WDR1,ARPC5,ARPC4,ACTR3,ACTR2,ARPC2,ARPC1A,DSTN,MACF1,CORO1C,DBNL,LIMA1,MICALL2,MYO18A
6_Member	GO Biological Processes	GO:0051493	regulation of cytoskeleton organization	-13.1679	-10.8884	56/527	25,118,396,397,822,830,832,998,1073,1213,1490,1499,1613,1778,2017,2885,2934,3192,3611,4035,4089,4641,4869,4926,5048,5066,5217,5879,5962,6093,6385,6624,6709,7043,9475,9948,10015,10092,10093,10096,10097,10109,10519,10552,10769,11034,22919,25802,25932,51474,55243,90102,128866,136319,256949,285590	ABL1,ADD1,ARHGDIA,ARHGDIB,CAPG,CAPZA2,CAPZB,CDC42,CFL2,CLTC,CCN2,CTNNB1,DAPK3,DYNC1H1,CTTN,GRB2,GSN,HNRNPU,ILK,LRP1,SMAD4,MYO1C,NPM1,NUMA1,PAFAH1B1,PAM,PFN2,RAC1,RDX,ROCK1,SDC4,FSCN1,SPTAN1,TGFB3,ROCK2,WDR1,PDCD6IP,ARPC5,ARPC4,ACTR3,ACTR2,ARPC2,CIB1,ARPC1A,PLK2,DSTN,MAPRE1,LMOD1,CLIC4,LIMA1,KIRREL1,PHLDB2,CHMP4B,MTPN,KANK3,SH3PXD2B
6_Member	GO Biological Processes	GO:0032956	regulation of actin cytoskeleton organization	-12.7293	-10.4812	43/341	25,118,396,397,822,830,832,998,1073,1490,1613,2017,2885,2934,3611,4035,4089,4641,5066,5217,5879,5962,6093,6385,6624,6709,7043,9475,9948,10092,10093,10096,10097,10109,10552,11034,25802,51474,55243,90102,136319,256949,285590	ABL1,ADD1,ARHGDIA,ARHGDIB,CAPG,CAPZA2,CAPZB,CDC42,CFL2,CCN2,DAPK3,CTTN,GRB2,GSN,ILK,LRP1,SMAD4,MYO1C,PAM,PFN2,RAC1,RDX,ROCK1,SDC4,FSCN1,SPTAN1,TGFB3,ROCK2,WDR1,ARPC5,ARPC4,ACTR3,ACTR2,ARPC2,ARPC1A,DSTN,LMOD1,LIMA1,KIRREL1,PHLDB2,MTPN,KANK3,SH3PXD2B
6_Member	GO Biological Processes	GO:0022411	cellular component disassembly	-12.0916	-9.88824	55/543	101,118,649,665,682,822,830,832,960,1073,1499,1513,1520,1855,2017,2107,2191,2934,3099,3312,3799,3837,3915,3920,4035,4324,5045,5048,5499,5962,6418,6591,6597,6599,6624,6709,7043,7077,7415,8729,8878,9349,9948,10519,10630,11034,11140,25802,26993,51474,57154,84545,93974,136319,285590	ADAM8,ADD1,BMP1,BNIP3L,BSG,CAPG,CAPZA2,CAPZB,CD44,CFL2,CTNNB1,CTSK,CTSS,DVL1,CTTN,ETF1,FAP,GSN,HK2,HSPA8,KIF5B,KPNB1,LAMC1,LAMP2,LRP1,MMP15,FURIN,PAFAH1B1,PPP1CA,RDX,SET,SNAI2,SMARCA4,SMARCC1,FSCN1,SPTAN1,TGFB3,TIMP2,VCP,GBF1,SQSTM1,RPL23,WDR1,CIB1,PDPN,DSTN,CDC37,LMOD1,AKAP8L,LIMA1,SMURF1,MRPL43,ATP5IF1,MTPN,SH3PXD2B
6_Member	GO Biological Processes	GO:1902903	regulation of supramolecular fiber organization	-11.7224	-9.54842	42/350	25,118,351,822,830,832,998,1073,1191,1490,2017,2885,2934,3312,4089,4641,4926,5217,5879,5962,6093,6385,6709,7043,9475,9948,10092,10093,10096,10097,10109,10519,10552,11034,22919,25802,51474,55243,90102,136319,256949,285590	ABL1,ADD1,APP,CAPG,CAPZA2,CAPZB,CDC42,CFL2,CLU,CCN2,CTTN,GRB2,GSN,HSPA8,SMAD4,MYO1C,NUMA1,PFN2,RAC1,RDX,ROCK1,SDC4,SPTAN1,TGFB3,ROCK2,WDR1,ARPC5,ARPC4,ACTR3,ACTR2,ARPC2,CIB1,ARPC1A,DSTN,MAPRE1,LMOD1,LIMA1,KIRREL1,PHLDB2,MTPN,KANK3,SH3PXD2B
6_Member	GO Biological Processes	GO:0044089	positive regulation of cellular component biogenesis	-11.693	-9.52459	54/539	25,822,998,1191,1490,1499,1642,1778,1809,1981,2017,2885,2934,3320,3725,4478,4641,4926,5217,5706,5879,6093,6382,6385,6386,6624,7043,7058,7070,7415,7422,7879,8826,9146,9448,9475,9750,9780,10015,10092,10093,10096,10097,10109,10552,22919,23019,25802,27286,51100,55243,90102,285590,404672	ABL1,CAPG,CDC42,CLU,CCN2,CTNNB1,DDB1,DYNC1H1,DPYSL3,EIF4G1,CTTN,GRB2,GSN,HSP90AA1,JUN,MSN,MYO1C,NUMA1,PFN2,PSMC6,RAC1,ROCK1,SDC1,SDC4,SDCBP,FSCN1,TGFB3,THBS2,THY1,VCP,VEGFA,RAB7A,IQGAP1,HGS,MAP4K4,ROCK2,RIPOR2,PIEZO1,PDCD6IP,ARPC5,ARPC4,ACTR3,ACTR2,ARPC2,ARPC1A,MAPRE1,CNOT1,LMOD1,SRPX2,SH3GLB1,KIRREL1,PHLDB2,SH3PXD2B,GTF2H5
6_Member	GO Biological Processes	GO:0110053	regulation of actin filament organization	-11.1915	-9.04842	35/262	25,118,822,830,832,998,1073,1490,2017,2885,2934,4641,5217,5879,5962,6093,6385,6709,7043,9475,9948,10092,10093,10096,10097,10109,10552,11034,25802,51474,55243,90102,136319,256949,285590	ABL1,ADD1,CAPG,CAPZA2,CAPZB,CDC42,CFL2,CCN2,CTTN,GRB2,GSN,MYO1C,PFN2,RAC1,RDX,ROCK1,SDC4,SPTAN1,TGFB3,ROCK2,WDR1,ARPC5,ARPC4,ACTR3,ACTR2,ARPC2,ARPC1A,DSTN,LMOD1,LIMA1,KIRREL1,PHLDB2,MTPN,KANK3,SH3PXD2B
6_Member	GO Biological Processes	GO:0032535	regulation of cellular component size	-11.0054	-8.87967	42/368	25,118,822,830,832,1073,1173,2017,2335,2885,2934,3475,3611,4035,4478,4641,5048,5217,5499,5879,5962,6709,7422,8301,8766,9948,10092,10093,10096,10097,10109,10552,11034,23011,23499,25802,50809,51474,55243,57142,136319,256949	ABL1,ADD1,CAPG,CAPZA2,CAPZB,CFL2,AP2M1,CTTN,FN1,GRB2,GSN,IFRD1,ILK,LRP1,MSN,MYO1C,PAFAH1B1,PFN2,PPP1CA,RAC1,RDX,SPTAN1,VEGFA,PICALM,RAB11A,WDR1,ARPC5,ARPC4,ACTR3,ACTR2,ARPC2,ARPC1A,DSTN,RAB21,MACF1,LMOD1,HP1BP3,LIMA1,KIRREL1,RTN4,MTPN,KANK3
6_Member	GO Biological Processes	GO:0051129	negative regulation of cellular component organization	-10.9095	-8.79129	63/722	81,118,351,396,567,822,830,832,998,1191,1487,1522,1809,1843,1978,2191,2934,3066,3192,3312,3475,3550,3998,4000,4035,4043,4089,4134,4193,4851,4869,5048,5217,5573,5879,5962,6093,6386,6418,6709,6830,7070,7417,7431,7879,8301,9448,9475,10449,10519,10631,10769,22919,23603,25802,29956,51474,57142,84894,90102,128866,136319,256949	ACTN4,ADD1,APP,ARHGDIA,B2M,CAPG,CAPZA2,CAPZB,CDC42,CLU,CTBP1,CTSZ,DPYSL3,DUSP1,EIF4EBP1,FAP,GSN,HDAC2,HNRNPU,HSPA8,IFRD1,IK,LMAN1,LMNA,LRP1,LRPAP1,SMAD4,MAP4,MDM2,NOTCH1,NPM1,PAFAH1B1,PFN2,PRKAR1A,RAC1,RDX,ROCK1,SDCBP,SET,SPTAN1,SUPT6H,THY1,VDAC2,VIM,RAB7A,PICALM,MAP4K4,ROCK2,ACAA2,CIB1,POSTN,PLK2,MAPRE1,CORO1C,LMOD1,CERS2,LIMA1,RTN4,LINGO1,PHLDB2,CHMP4B,MTPN,KANK3
6_Member	GO Biological Processes	GO:0008154	actin polymerization or depolymerization	-9.83218	-7.79569	29/208	118,822,830,832,1073,2017,2885,2934,4641,5217,5879,5962,6709,9948,10092,10093,10096,10097,10109,10487,10552,11034,25802,51474,51734,55243,79778,136319,256949	ADD1,CAPG,CAPZA2,CAPZB,CFL2,CTTN,GRB2,GSN,MYO1C,PFN2,RAC1,RDX,SPTAN1,WDR1,ARPC5,ARPC4,ACTR3,ACTR2,ARPC2,CAP1,ARPC1A,DSTN,LMOD1,LIMA1,MSRB1,KIRREL1,MICALL2,MTPN,KANK3
6_Member	GO Biological Processes	GO:0043254	regulation of protein complex assembly	-9.59031	-7.57005	45/457	25,118,822,830,832,998,1191,1499,1642,1978,1981,2017,2885,2934,3312,3320,3725,4478,4641,4926,5217,5706,5879,5962,6624,6709,7415,7417,7422,9780,10092,10093,10096,10097,10109,10552,22919,23019,25802,51100,55243,56681,136319,256949,404672	ABL1,ADD1,CAPG,CAPZA2,CAPZB,CDC42,CLU,CTNNB1,DDB1,EIF4EBP1,EIF4G1,CTTN,GRB2,GSN,HSPA8,HSP90AA1,JUN,MSN,MYO1C,NUMA1,PFN2,PSMC6,RAC1,RDX,FSCN1,SPTAN1,VCP,VDAC2,VEGFA,PIEZO1,ARPC5,ARPC4,ACTR3,ACTR2,ARPC2,ARPC1A,MAPRE1,CNOT1,LMOD1,SH3GLB1,KIRREL1,SAR1A,MTPN,KANK3,GTF2H5
6_Member	GO Biological Processes	GO:1902905	positive regulation of supramolecular fiber organization	-9.30615	-7.32583	28/205	25,351,998,1073,1191,1490,2017,2885,2934,4641,4926,5217,5879,6385,7043,9475,9948,10092,10093,10096,10097,10109,10552,11034,22919,25802,55243,285590	ABL1,APP,CDC42,CFL2,CLU,CCN2,CTTN,GRB2,GSN,MYO1C,NUMA1,PFN2,RAC1,SDC4,TGFB3,ROCK2,WDR1,ARPC5,ARPC4,ACTR3,ACTR2,ARPC2,ARPC1A,DSTN,MAPRE1,LMOD1,KIRREL1,SH3PXD2B
6_Member	GO Biological Processes	GO:0031334	positive regulation of protein complex assembly	-9.14846	-7.18594	32/265	822,1191,1499,1642,1981,2017,2885,2934,3320,3725,4478,4641,4926,5217,5706,5879,6624,7415,7422,9780,10092,10093,10096,10097,10109,10552,22919,23019,25802,51100,55243,404672	CAPG,CLU,CTNNB1,DDB1,EIF4G1,CTTN,GRB2,GSN,HSP90AA1,JUN,MSN,MYO1C,NUMA1,PFN2,PSMC6,RAC1,FSCN1,VCP,VEGFA,PIEZO1,ARPC5,ARPC4,ACTR3,ACTR2,ARPC2,ARPC1A,MAPRE1,CNOT1,LMOD1,SH3GLB1,KIRREL1,GTF2H5
6_Member	GO Biological Processes	GO:0090066	regulation of anatomical structure size	-8.77463	-6.83587	46/502	25,118,822,830,832,1073,1173,2017,2335,2885,2934,3162,3475,3611,4035,4478,4641,5048,5217,5499,5879,5962,6093,6709,7422,8301,8766,9475,9948,10092,10093,10096,10097,10109,10552,11034,23011,23499,25802,50809,51474,55243,57142,59342,136319,256949	ABL1,ADD1,CAPG,CAPZA2,CAPZB,CFL2,AP2M1,CTTN,FN1,GRB2,GSN,HMOX1,IFRD1,ILK,LRP1,MSN,MYO1C,PAFAH1B1,PFN2,PPP1CA,RAC1,RDX,ROCK1,SPTAN1,VEGFA,PICALM,RAB11A,ROCK2,WDR1,ARPC5,ARPC4,ACTR3,ACTR2,ARPC2,ARPC1A,DSTN,RAB21,MACF1,LMOD1,HP1BP3,LIMA1,KIRREL1,RTN4,SCPEP1,MTPN,KANK3
6_Member	GO Biological Processes	GO:0008064	regulation of actin polymerization or depolymerization	-8.53125	-6.61344	25/180	118,822,830,832,1073,2017,2885,2934,4641,5217,5962,6709,9948,10092,10093,10096,10097,10109,10552,11034,25802,51474,55243,136319,256949	ADD1,CAPG,CAPZA2,CAPZB,CFL2,CTTN,GRB2,GSN,MYO1C,PFN2,RDX,SPTAN1,WDR1,ARPC5,ARPC4,ACTR3,ACTR2,ARPC2,ARPC1A,DSTN,LMOD1,LIMA1,KIRREL1,MTPN,KANK3
6_Member	GO Biological Processes	GO:0030832	regulation of actin filament length	-8.48077	-6.56606	25/181	118,822,830,832,1073,2017,2885,2934,4641,5217,5962,6709,9948,10092,10093,10096,10097,10109,10552,11034,25802,51474,55243,136319,256949	ADD1,CAPG,CAPZA2,CAPZB,CFL2,CTTN,GRB2,GSN,MYO1C,PFN2,RDX,SPTAN1,WDR1,ARPC5,ARPC4,ACTR3,ACTR2,ARPC2,ARPC1A,DSTN,LMOD1,LIMA1,KIRREL1,MTPN,KANK3
6_Member	GO Biological Processes	GO:0032271	regulation of protein polymerization	-8.32182	-6.41642	27/212	25,118,822,830,832,2017,2885,2934,3320,4641,4926,5217,5879,5962,6709,7417,10092,10093,10096,10097,10109,10552,22919,25802,55243,136319,256949	ABL1,ADD1,CAPG,CAPZA2,CAPZB,CTTN,GRB2,GSN,HSP90AA1,MYO1C,NUMA1,PFN2,RAC1,RDX,SPTAN1,VDAC2,ARPC5,ARPC4,ACTR3,ACTR2,ARPC2,ARPC1A,MAPRE1,LMOD1,KIRREL1,MTPN,KANK3
6_Member	GO Biological Processes	GO:0030834	regulation of actin filament depolymerization	-8.04423	-6.16119	13/50	118,822,830,832,1073,2934,5962,6709,9948,11034,25802,51474,136319	ADD1,CAPG,CAPZA2,CAPZB,CFL2,GSN,RDX,SPTAN1,WDR1,DSTN,LMOD1,LIMA1,MTPN
6_Member	GO Biological Processes	GO:0030041	actin filament polymerization	-7.86151	-6.00385	24/180	118,822,830,832,2017,2885,2934,4641,5217,5879,5962,6709,10092,10093,10096,10097,10109,10552,25802,51734,55243,79778,136319,256949	ADD1,CAPG,CAPZA2,CAPZB,CTTN,GRB2,GSN,MYO1C,PFN2,RAC1,RDX,SPTAN1,ARPC5,ARPC4,ACTR3,ACTR2,ARPC2,ARPC1A,LMOD1,MSRB1,KIRREL1,MICALL2,MTPN,KANK3
6_Member	GO Biological Processes	GO:0051495	positive regulation of cytoskeleton organization	-7.72078	-5.87983	27/226	25,998,1073,1490,1778,2017,2885,2934,4641,4926,5217,5879,6385,7043,9475,9948,10092,10093,10096,10097,10109,10552,11034,22919,25802,55243,285590	ABL1,CDC42,CFL2,CCN2,DYNC1H1,CTTN,GRB2,GSN,MYO1C,NUMA1,PFN2,RAC1,SDC4,TGFB3,ROCK2,WDR1,ARPC5,ARPC4,ACTR3,ACTR2,ARPC2,ARPC1A,DSTN,MAPRE1,LMOD1,KIRREL1,SH3PXD2B
6_Member	GO Biological Processes	GO:0030042	actin filament depolymerization	-7.71057	-5.8743	13/53	118,822,830,832,1073,2934,5962,6709,9948,11034,25802,51474,136319	ADD1,CAPG,CAPZA2,CAPZB,CFL2,GSN,RDX,SPTAN1,WDR1,DSTN,LMOD1,LIMA1,MTPN
6_Member	GO Biological Processes	GO:0051258	protein polymerization	-7.48194	-5.66853	30/278	25,118,822,830,832,2017,2879,2885,2934,3320,4641,4926,5217,5879,5962,6709,7417,10092,10093,10096,10097,10109,10552,22919,25802,51734,55243,79778,136319,256949	ABL1,ADD1,CAPG,CAPZA2,CAPZB,CTTN,GPX4,GRB2,GSN,HSP90AA1,MYO1C,NUMA1,PFN2,RAC1,RDX,SPTAN1,VDAC2,ARPC5,ARPC4,ACTR3,ACTR2,ARPC2,ARPC1A,MAPRE1,LMOD1,MSRB1,KIRREL1,MICALL2,MTPN,KANK3
6_Member	GO Biological Processes	GO:0030833	regulation of actin filament polymerization	-6.84171	-5.08101	21/160	118,822,830,832,2017,2885,2934,4641,5217,5962,6709,10092,10093,10096,10097,10109,10552,25802,55243,136319,256949	ADD1,CAPG,CAPZA2,CAPZB,CTTN,GRB2,GSN,MYO1C,PFN2,RDX,SPTAN1,ARPC5,ARPC4,ACTR3,ACTR2,ARPC2,ARPC1A,LMOD1,KIRREL1,MTPN,KANK3
6_Member	GO Biological Processes	GO:0032272	negative regulation of protein polymerization	-6.1927	-4.50331	13/70	118,822,830,832,2934,5217,5962,6709,7417,22919,25802,136319,256949	ADD1,CAPG,CAPZA2,CAPZB,GSN,PFN2,RDX,SPTAN1,VDAC2,MAPRE1,LMOD1,MTPN,KANK3
6_Member	GO Biological Processes	GO:1901879	regulation of protein depolymerization	-6.15373	-4.46804	14/82	118,822,830,832,1073,2934,5962,6709,9948,10519,11034,25802,51474,136319	ADD1,CAPG,CAPZA2,CAPZB,CFL2,GSN,RDX,SPTAN1,WDR1,CIB1,DSTN,LMOD1,LIMA1,MTPN
6_Member	GO Biological Processes	GO:0030835	negative regulation of actin filament depolymerization	-6.15009	-4.46532	10/40	118,822,830,832,2934,5962,6709,25802,51474,136319	ADD1,CAPG,CAPZA2,CAPZB,GSN,RDX,SPTAN1,LMOD1,LIMA1,MTPN
6_Member	GO Biological Processes	GO:1902904	negative regulation of supramolecular fiber organization	-5.96263	-4.30201	18/137	118,822,830,832,1191,2934,3312,4089,5217,5962,6709,10519,22919,25802,51474,90102,136319,256949	ADD1,CAPG,CAPZA2,CAPZB,CLU,GSN,HSPA8,SMAD4,PFN2,RDX,SPTAN1,CIB1,MAPRE1,LMOD1,LIMA1,PHLDB2,MTPN,KANK3
6_Member	GO Biological Processes	GO:0051016	barbed-end actin filament capping	-5.7198	-4.09429	7/19	118,822,830,832,2934,5962,136319	ADD1,CAPG,CAPZA2,CAPZB,GSN,RDX,MTPN
6_Member	GO Cellular Components	GO:0008290	F-actin capping protein complex	-5.61901	-4.00537	5/8	118,822,830,832,136319	ADD1,CAPG,CAPZA2,CAPZB,MTPN
6_Member	GO Biological Processes	GO:0030837	negative regulation of actin filament polymerization	-5.5028	-3.90601	11/57	118,822,830,832,2934,5217,5962,6709,25802,136319,256949	ADD1,CAPG,CAPZA2,CAPZB,GSN,PFN2,RDX,SPTAN1,LMOD1,MTPN,KANK3
6_Member	GO Biological Processes	GO:0051693	actin filament capping	-5.48329	-3.88726	9/37	118,822,830,832,2934,5962,6709,25802,136319	ADD1,CAPG,CAPZA2,CAPZB,GSN,RDX,SPTAN1,LMOD1,MTPN
6_Member	GO Biological Processes	GO:0032273	positive regulation of protein polymerization	-5.45471	-3.86363	17/134	2017,2885,2934,3320,4641,4926,5217,5879,10092,10093,10096,10097,10109,10552,22919,25802,55243	CTTN,GRB2,GSN,HSP90AA1,MYO1C,NUMA1,PFN2,RAC1,ARPC5,ARPC4,ACTR3,ACTR2,ARPC2,ARPC1A,MAPRE1,LMOD1,KIRREL1
6_Member	GO Biological Processes	GO:0051261	protein depolymerization	-5.32413	-3.75075	15/109	118,822,830,832,1073,2934,3312,5962,6709,9948,10519,11034,25802,51474,136319	ADD1,CAPG,CAPZA2,CAPZB,CFL2,GSN,HSPA8,RDX,SPTAN1,WDR1,CIB1,DSTN,LMOD1,LIMA1,MTPN
6_Member	GO Biological Processes	GO:0043244	regulation of protein complex disassembly	-5.27425	-3.7128	15/110	118,822,830,832,1073,2107,2934,5962,6709,9948,10519,11034,25802,51474,136319	ADD1,CAPG,CAPZA2,CAPZB,CFL2,ETF1,GSN,RDX,SPTAN1,WDR1,CIB1,DSTN,LMOD1,LIMA1,MTPN
6_Member	GO Biological Processes	GO:0051494	negative regulation of cytoskeleton organization	-5.02863	-3.50433	17/144	118,822,830,832,2934,4089,4869,5217,5962,6709,10519,22919,25802,51474,90102,136319,256949	ADD1,CAPG,CAPZA2,CAPZB,GSN,SMAD4,NPM1,PFN2,RDX,SPTAN1,CIB1,MAPRE1,LMOD1,LIMA1,PHLDB2,MTPN,KANK3
6_Member	GO Biological Processes	GO:1901880	negative regulation of protein depolymerization	-4.99227	-3.47241	11/64	118,822,830,832,2934,5962,6709,10519,25802,51474,136319	ADD1,CAPG,CAPZA2,CAPZB,GSN,RDX,SPTAN1,CIB1,LMOD1,LIMA1,MTPN
6_Member	GO Biological Processes	GO:0010639	negative regulation of organelle organization	-4.93305	-3.42067	31/386	118,822,830,832,1191,1487,1843,2934,3192,3550,3998,4000,4089,4134,4869,5217,5573,5962,6418,6709,6830,7879,10449,10519,22919,25802,51474,90102,128866,136319,256949	ADD1,CAPG,CAPZA2,CAPZB,CLU,CTBP1,DUSP1,GSN,HNRNPU,IK,LMAN1,LMNA,SMAD4,MAP4,NPM1,PFN2,PRKAR1A,RDX,SET,SPTAN1,SUPT6H,RAB7A,ACAA2,CIB1,MAPRE1,LMOD1,LIMA1,PHLDB2,CHMP4B,MTPN,KANK3
6_Member	GO Biological Processes	GO:0031333	negative regulation of protein complex assembly	-4.63095	-3.1559	16/139	118,822,830,832,998,1191,1978,2934,5217,5962,6709,7417,22919,25802,136319,256949	ADD1,CAPG,CAPZA2,CAPZB,CDC42,CLU,EIF4EBP1,GSN,PFN2,RDX,SPTAN1,VDAC2,MAPRE1,LMOD1,MTPN,KANK3
6_Member	GO Biological Processes	GO:0043242	negative regulation of protein complex disassembly	-4.54991	-3.08717	11/71	118,822,830,832,2934,5962,6709,10519,25802,51474,136319	ADD1,CAPG,CAPZA2,CAPZB,GSN,RDX,SPTAN1,CIB1,LMOD1,LIMA1,MTPN
6_Member	GO Biological Processes	GO:0032984	protein-containing complex disassembly	-4.51681	-3.059	27/330	118,822,830,832,1073,1499,1855,2107,2934,3312,3799,3920,5499,5962,6418,6597,6599,6709,7415,9349,9948,10519,11034,25802,51474,84545,136319	ADD1,CAPG,CAPZA2,CAPZB,CFL2,CTNNB1,DVL1,ETF1,GSN,HSPA8,KIF5B,LAMP2,PPP1CA,RDX,SET,SMARCA4,SMARCC1,SPTAN1,VCP,RPL23,WDR1,CIB1,DSTN,LMOD1,LIMA1,MRPL43,MTPN
6_Member	GO Biological Processes	GO:0030838	positive regulation of actin filament polymerization	-4.38136	-2.9391	13/101	2017,2885,2934,4641,5217,10092,10093,10096,10097,10109,10552,25802,55243	CTTN,GRB2,GSN,MYO1C,PFN2,ARPC5,ARPC4,ACTR3,ACTR2,ARPC2,ARPC1A,LMOD1,KIRREL1
6_Member	GO Biological Processes	GO:0043624	cellular protein complex disassembly	-2.85944	-1.6614	17/217	118,822,830,832,1073,2107,2934,3312,5962,6709,9948,10519,11034,25802,51474,84545,136319	ADD1,CAPG,CAPZA2,CAPZB,CFL2,ETF1,GSN,HSPA8,RDX,SPTAN1,WDR1,CIB1,DSTN,LMOD1,LIMA1,MRPL43,MTPN
7_Summary	GO Cellular Components	GO:0005788	endoplasmic reticulum lumen	-25.8291	-23.2485	58/308	334,351,411,567,821,871,1075,1191,1277,1278,1284,1290,1291,1292,1293,1301,1303,1462,1522,1622,2200,2335,2719,2923,3371,3490,3895,3912,3913,3915,4043,4240,5033,5034,5611,5768,5955,6383,7184,7873,8729,9601,10491,10525,10954,11098,11167,23193,30001,51060,51148,54587,56005,60681,64175,91851,143888,283208,1642,5685,5689,5690,5695,5706,5707,5708,5709,5713,5719,5861,5862,8766,9021,9230,26118,55527,55827…	APLP2,APP,ARSB,B2M,CANX,SERPINH1,CTSC,CLU,COL1A1,COL1A2,COL4A2,COL5A2,COL6A1,COL6A2,COL6A3,COL11A1,COL12A1,VCAN,CTSZ,DBI,FBN1,FN1,GPC3,PDIA3,TNC,IGFBP7,KTN1,LAMB1,LAMB2,LAMC1,LRPAP1,MFGE8,P4HA1,P4HB,DNAJC3,QSOX1,RCN2,SDC2,HSP90B1,MANF,GBF1,PDIA4,CRTAP,HYOU1,PDIA5,PRSS23,FSTL1,GANAB,ERO1A,TXNDC12,CERCAM,MXRA8,MYDGF,FKBP10,P3H1,CHRDL1,POGLUT3,P4HA3,DDB1,PSMA4,PSMB1,PSMB2,PSMB7,PSMC6,PSMD1,PSMD2,PSM…
7_Member	GO Cellular Components	GO:0005788	endoplasmic reticulum lumen	-25.8291	-23.2485	58/308	334,351,411,567,821,871,1075,1191,1277,1278,1284,1290,1291,1292,1293,1301,1303,1462,1522,1622,2200,2335,2719,2923,3371,3490,3895,3912,3913,3915,4043,4240,5033,5034,5611,5768,5955,6383,7184,7873,8729,9601,10491,10525,10954,11098,11167,23193,30001,51060,51148,54587,56005,60681,64175,91851,143888,283208	APLP2,APP,ARSB,B2M,CANX,SERPINH1,CTSC,CLU,COL1A1,COL1A2,COL4A2,COL5A2,COL6A1,COL6A2,COL6A3,COL11A1,COL12A1,VCAN,CTSZ,DBI,FBN1,FN1,GPC3,PDIA3,TNC,IGFBP7,KTN1,LAMB1,LAMB2,LAMC1,LRPAP1,MFGE8,P4HA1,P4HB,DNAJC3,QSOX1,RCN2,SDC2,HSP90B1,MANF,GBF1,PDIA4,CRTAP,HYOU1,PDIA5,PRSS23,FSTL1,GANAB,ERO1A,TXNDC12,CERCAM,MXRA8,MYDGF,FKBP10,P3H1,CHRDL1,POGLUT3,P4HA3
7_Member	GO Biological Processes	GO:0043687	post-translational protein modification	-12.3638	-10.1481	44/364	334,351,1462,1642,2200,2335,2719,3371,3490,3895,3912,3913,3915,4240,5034,5611,5685,5689,5690,5695,5706,5707,5708,5709,5713,5719,5768,5861,5862,6383,7184,8766,9021,9230,10491,11098,11167,26118,54587,55527,55827,64175,79016,91851	APLP2,APP,VCAN,DDB1,FBN1,FN1,GPC3,TNC,IGFBP7,KTN1,LAMB1,LAMB2,LAMC1,MFGE8,P4HB,DNAJC3,PSMA4,PSMB1,PSMB2,PSMB7,PSMC6,PSMD1,PSMD2,PSMD3,PSMD7,PSMD13,QSOX1,RAB1A,RAB2A,SDC2,HSP90B1,RAB11A,SOCS3,RAB11B,CRTAP,PRSS23,FSTL1,WSB1,MXRA8,FEM1A,DCAF6,P3H1,DDA1,CHRDL1
8_Summary	GO Cellular Components	GO:0042470	melanosome	-24.465	-21.9057	35/106	191,302,309,476,526,682,821,822,1200,1213,1508,1509,2923,3312,3320,3688,3916,5034,5052,5861,5862,5879,5901,6184,6386,6513,7184,7529,7531,7879,9601,10015,10972,23193,27044	AHCY,ANXA2,ANXA6,ATP1A1,ATP6V1B2,BSG,CANX,CAPG,TPP1,CLTC,CTSB,CTSD,PDIA3,HSPA8,HSP90AA1,ITGB1,LAMP1,P4HB,PRDX1,RAB1A,RAB2A,RAC1,RAN,RPN1,SDCBP,SLC2A1,HSP90B1,YWHAB,YWHAE,RAB7A,PDIA4,PDCD6IP,TMED10,GANAB,SND1
8_Member	GO Cellular Components	GO:0042470	melanosome	-24.465	-21.9057	35/106	191,302,309,476,526,682,821,822,1200,1213,1508,1509,2923,3312,3320,3688,3916,5034,5052,5861,5862,5879,5901,6184,6386,6513,7184,7529,7531,7879,9601,10015,10972,23193,27044	AHCY,ANXA2,ANXA6,ATP1A1,ATP6V1B2,BSG,CANX,CAPG,TPP1,CLTC,CTSB,CTSD,PDIA3,HSPA8,HSP90AA1,ITGB1,LAMP1,P4HB,PRDX1,RAB1A,RAB2A,RAC1,RAN,RPN1,SDCBP,SLC2A1,HSP90B1,YWHAB,YWHAE,RAB7A,PDIA4,PDCD6IP,TMED10,GANAB,SND1
8_Member	GO Cellular Components	GO:0048770	pigment granule	-24.465	-21.9057	35/106	191,302,309,476,526,682,821,822,1200,1213,1508,1509,2923,3312,3320,3688,3916,5034,5052,5861,5862,5879,5901,6184,6386,6513,7184,7529,7531,7879,9601,10015,10972,23193,27044	AHCY,ANXA2,ANXA6,ATP1A1,ATP6V1B2,BSG,CANX,CAPG,TPP1,CLTC,CTSB,CTSD,PDIA3,HSPA8,HSP90AA1,ITGB1,LAMP1,P4HB,PRDX1,RAB1A,RAB2A,RAC1,RAN,RPN1,SDCBP,SLC2A1,HSP90B1,YWHAB,YWHAE,RAB7A,PDIA4,PDCD6IP,TMED10,GANAB,SND1
9_Summary	GO Cellular Components	GO:0031252	cell leading edge	-20.037	-17.5475	58/398	25,70,302,351,378,468,526,822,960,1495,1499,1500,1809,1915,2017,2191,2319,2934,3611,3685,3688,4627,4628,4641,4739,5048,5879,5962,6093,6277,6282,6624,7070,7431,8394,8516,8729,8826,9260,9564,9750,9780,10092,10096,10097,10109,10519,10630,23022,23499,23513,23603,23647,28988,51474,55740,79971,90102,1212,2782,2821,4478,4891,8573,22919,30845,54587,55243	ABL1,ACTC1,ANXA2,APP,ARF4,ATF4,ATP6V1B2,CAPG,CD44,CTNNA1,CTNNB1,CTNND1,DPYSL3,EEF1A1,CTTN,FAP,FLOT2,GSN,ILK,ITGAV,ITGB1,MYH9,MYH10,MYO1C,NEDD9,PAFAH1B1,RAC1,RDX,ROCK1,S100A6,S100A11,FSCN1,THY1,VIM,PIP5K1A,ITGA8,GBF1,IQGAP1,PDLIM7,BCAR1,RIPOR2,PIEZO1,ARPC5,ACTR3,ACTR2,ARPC2,CIB1,PDPN,PALLD,MACF1,SCRIB,CORO1C,ARFIP2,DBNL,LIMA1,ENAH,WLS,PHLDB2,CLTB,GNB1,GPI,MSN,SLC11A2,CASK,MAPRE1,EHD3,MXRA8,KIRREL1
9_Member	GO Cellular Components	GO:0031252	cell leading edge	-20.037	-17.5475	58/398	25,70,302,351,378,468,526,822,960,1495,1499,1500,1809,1915,2017,2191,2319,2934,3611,3685,3688,4627,4628,4641,4739,5048,5879,5962,6093,6277,6282,6624,7070,7431,8394,8516,8729,8826,9260,9564,9750,9780,10092,10096,10097,10109,10519,10630,23022,23499,23513,23603,23647,28988,51474,55740,79971,90102	ABL1,ACTC1,ANXA2,APP,ARF4,ATF4,ATP6V1B2,CAPG,CD44,CTNNA1,CTNNB1,CTNND1,DPYSL3,EEF1A1,CTTN,FAP,FLOT2,GSN,ILK,ITGAV,ITGB1,MYH9,MYH10,MYO1C,NEDD9,PAFAH1B1,RAC1,RDX,ROCK1,S100A6,S100A11,FSCN1,THY1,VIM,PIP5K1A,ITGA8,GBF1,IQGAP1,PDLIM7,BCAR1,RIPOR2,PIEZO1,ARPC5,ACTR3,ACTR2,ARPC2,CIB1,PDPN,PALLD,MACF1,SCRIB,CORO1C,ARFIP2,DBNL,LIMA1,ENAH,WLS,PHLDB2
9_Member	GO Cellular Components	GO:0030027	lamellipodium	-15.625	-13.2394	35/188	70,351,822,960,1495,1499,1500,1809,2017,2191,2319,2934,3611,3685,3688,4628,4739,5879,5962,6093,6624,8394,9564,9780,10092,10096,10097,10109,10519,10630,23022,23513,23603,28988,55740	ACTC1,APP,CAPG,CD44,CTNNA1,CTNNB1,CTNND1,DPYSL3,CTTN,FAP,FLOT2,GSN,ILK,ITGAV,ITGB1,MYH10,NEDD9,RAC1,RDX,ROCK1,FSCN1,PIP5K1A,BCAR1,PIEZO1,ARPC5,ACTR3,ACTR2,ARPC2,CIB1,PDPN,PALLD,SCRIB,CORO1C,DBNL,ENAH
9_Member	GO Cellular Components	GO:0001726	ruffle	-12.7718	-10.5169	30/171	302,378,526,822,1915,2017,2191,2934,3685,3688,4627,4641,5879,5962,6093,6277,6282,6624,8394,8826,9260,9564,10519,10630,23022,23499,23603,23647,28988,51474	ANXA2,ARF4,ATP6V1B2,CAPG,EEF1A1,CTTN,FAP,GSN,ITGAV,ITGB1,MYH9,MYO1C,RAC1,RDX,ROCK1,S100A6,S100A11,FSCN1,PIP5K1A,IQGAP1,PDLIM7,BCAR1,CIB1,PDPN,PALLD,MACF1,CORO1C,ARFIP2,DBNL,LIMA1
9_Member	GO Cellular Components	GO:0031253	cell projection membrane	-6.98874	-5.21323	33/342	378,468,960,1212,1499,1915,2191,2782,2821,3685,3688,4478,4641,4891,5879,6624,7070,8394,8516,8573,9750,9780,10109,10519,10630,22919,23499,23603,30845,51474,54587,55243,79971	ARF4,ATF4,CD44,CLTB,CTNNB1,EEF1A1,FAP,GNB1,GPI,ITGAV,ITGB1,MSN,MYO1C,SLC11A2,RAC1,FSCN1,THY1,PIP5K1A,ITGA8,CASK,RIPOR2,PIEZO1,ARPC2,CIB1,PDPN,MAPRE1,MACF1,CORO1C,EHD3,LIMA1,MXRA8,KIRREL1,WLS
9_Member	GO Cellular Components	GO:0031256	leading edge membrane	-5.15688	-3.61573	19/171	378,468,960,1915,2191,3685,3688,4641,5879,7070,8394,8516,9750,9780,10519,10630,23499,23603,79971	ARF4,ATF4,CD44,EEF1A1,FAP,ITGAV,ITGB1,MYO1C,RAC1,THY1,PIP5K1A,ITGA8,RIPOR2,PIEZO1,CIB1,PDPN,MACF1,CORO1C,WLS
9_Member	GO Cellular Components	GO:0032587	ruffle membrane	-4.1001	-2.70043	12/93	378,1915,2191,3685,3688,4641,5879,8394,10519,10630,23499,23603	ARF4,EEF1A1,FAP,ITGAV,ITGB1,MYO1C,RAC1,PIP5K1A,CIB1,PDPN,MACF1,CORO1C
10_Summary	GO Biological Processes	GO:0034329	cell junction assembly	-19.2965	-16.8128	44/239	25,60,71,81,977,998,1012,1495,1499,1500,1613,2017,2335,2697,2889,3611,3655,3728,3915,4035,4641,5339,5879,6093,6385,6591,6624,7070,7414,7422,8394,8826,9448,9475,9948,10015,23499,23603,51564,55679,79778,81671,90102,92140,118,5962,7043,83605,708,960,1277,1490,2199,3685,3688,3693,3912,4739,4814,4851,5861,7791,8322,8516,8573,10109,10519,10630,10631,10855,84034,151887,70,1073,1266,2037,4089,4627,4628,5…	ABL1,ACTB,ACTG1,ACTN4,CD151,CDC42,CDH13,CTNNA1,CTNNB1,CTNND1,DAPK3,CTTN,FN1,GJA1,RAPGEF1,ILK,ITGA6,JUP,LAMC1,LRP1,MYO1C,PLEC,RAC1,ROCK1,SDC4,SNAI2,FSCN1,THY1,VCL,VEGFA,PIP5K1A,IQGAP1,MAP4K4,ROCK2,WDR1,PDCD6IP,MACF1,CORO1C,HDAC7,LIMS2,MICALL2,VMP1,PHLDB2,MTDH,ADD1,RDX,TGFB3,CCM2,C1QBP,CD44,COL1A1,CCN2,FBLN2,ITGAV,ITGB1,ITGB5,LAMB1,NEDD9,NINJ1,NOTCH1,RAB1A,ZYX,FZD4,ITGA8,CASK,ARPC2,CIB1,PDPN,POSTN,…
10_Member	GO Biological Processes	GO:0034329	cell junction assembly	-19.2965	-16.8128	44/239	25,60,71,81,977,998,1012,1495,1499,1500,1613,2017,2335,2697,2889,3611,3655,3728,3915,4035,4641,5339,5879,6093,6385,6591,6624,7070,7414,7422,8394,8826,9448,9475,9948,10015,23499,23603,51564,55679,79778,81671,90102,92140	ABL1,ACTB,ACTG1,ACTN4,CD151,CDC42,CDH13,CTNNA1,CTNNB1,CTNND1,DAPK3,CTTN,FN1,GJA1,RAPGEF1,ILK,ITGA6,JUP,LAMC1,LRP1,MYO1C,PLEC,RAC1,ROCK1,SDC4,SNAI2,FSCN1,THY1,VCL,VEGFA,PIP5K1A,IQGAP1,MAP4K4,ROCK2,WDR1,PDCD6IP,MACF1,CORO1C,HDAC7,LIMS2,MICALL2,VMP1,PHLDB2,MTDH
10_Member	GO Biological Processes	GO:0034330	cell junction organization	-19.0485	-16.5763	48/289	25,60,71,81,118,977,998,1012,1495,1499,1500,1613,2017,2335,2697,2889,3611,3655,3728,3915,4035,4641,5339,5879,5962,6093,6385,6591,6624,7043,7070,7414,7422,8394,8826,9448,9475,9948,10015,23499,23603,51564,55679,79778,81671,83605,90102,92140	ABL1,ACTB,ACTG1,ACTN4,ADD1,CD151,CDC42,CDH13,CTNNA1,CTNNB1,CTNND1,DAPK3,CTTN,FN1,GJA1,RAPGEF1,ILK,ITGA6,JUP,LAMC1,LRP1,MYO1C,PLEC,RAC1,RDX,ROCK1,SDC4,SNAI2,FSCN1,TGFB3,THY1,VCL,VEGFA,PIP5K1A,IQGAP1,MAP4K4,ROCK2,WDR1,PDCD6IP,MACF1,CORO1C,HDAC7,LIMS2,MICALL2,VMP1,CCM2,PHLDB2,MTDH
10_Member	GO Biological Processes	GO:0031589	cell-substrate adhesion	-18.0523	-15.5967	51/343	25,81,708,960,998,1012,1277,1490,1499,1613,2017,2199,2335,3611,3655,3685,3688,3693,3728,3912,3915,4035,4739,4814,4851,5861,5879,6093,6385,7070,7414,7422,7791,8322,8394,8516,8573,8826,9448,9475,10109,10519,10630,10631,10855,23499,23603,79778,84034,90102,151887	ABL1,ACTN4,C1QBP,CD44,CDC42,CDH13,COL1A1,CCN2,CTNNB1,DAPK3,CTTN,FBLN2,FN1,ILK,ITGA6,ITGAV,ITGB1,ITGB5,JUP,LAMB1,LAMC1,LRP1,NEDD9,NINJ1,NOTCH1,RAB1A,RAC1,ROCK1,SDC4,THY1,VCL,VEGFA,ZYX,FZD4,PIP5K1A,ITGA8,CASK,IQGAP1,MAP4K4,ROCK2,ARPC2,CIB1,PDPN,POSTN,HPSE,MACF1,CORO1C,MICALL2,EMILIN2,PHLDB2,CCDC80
10_Member	GO Biological Processes	GO:0010810	regulation of cell-substrate adhesion	-13.9617	-11.6242	35/212	25,81,708,998,1012,1277,1613,2199,2335,3611,3655,3728,4035,4739,4814,4851,5879,6093,6385,7070,7422,8322,8573,8826,9448,9475,10109,10519,10630,10631,23499,23603,84034,90102,151887	ABL1,ACTN4,C1QBP,CDC42,CDH13,COL1A1,DAPK3,FBLN2,FN1,ILK,ITGA6,JUP,LRP1,NEDD9,NINJ1,NOTCH1,RAC1,ROCK1,SDC4,THY1,VEGFA,FZD4,CASK,IQGAP1,MAP4K4,ROCK2,ARPC2,CIB1,PDPN,POSTN,MACF1,CORO1C,EMILIN2,PHLDB2,CCDC80
10_Member	GO Biological Processes	GO:0007160	cell-matrix adhesion	-13.162	-10.8861	35/225	25,960,1012,1490,1499,1613,2017,2335,3611,3655,3685,3688,3693,3728,4035,4814,5879,6093,6385,7070,7414,7422,7791,8394,8516,8573,8826,9448,9475,10519,10631,10855,23499,23603,90102	ABL1,CD44,CDH13,CCN2,CTNNB1,DAPK3,CTTN,FN1,ILK,ITGA6,ITGAV,ITGB1,ITGB5,JUP,LRP1,NINJ1,RAC1,ROCK1,SDC4,THY1,VCL,VEGFA,ZYX,PIP5K1A,ITGA8,CASK,IQGAP1,MAP4K4,ROCK2,CIB1,POSTN,HPSE,MACF1,CORO1C,PHLDB2
10_Member	GO Biological Processes	GO:0007044	cell-substrate junction assembly	-11.0327	-8.90438	21/96	25,977,1613,2017,2335,3655,3915,4035,5339,5879,6093,6385,7070,7422,8394,8826,9448,9475,23499,23603,90102	ABL1,CD151,DAPK3,CTTN,FN1,ITGA6,LAMC1,LRP1,PLEC,RAC1,ROCK1,SDC4,THY1,VEGFA,PIP5K1A,IQGAP1,MAP4K4,ROCK2,MACF1,CORO1C,PHLDB2
10_Member	GO Biological Processes	GO:0031032	actomyosin structure organization	-10.5797	-8.48424	29/194	25,70,71,998,1073,1266,1490,2037,3688,3693,4089,4627,4628,5217,5573,5879,6093,6385,7043,7139,7791,9475,9948,10015,25802,27063,90102,285590,399687	ABL1,ACTC1,ACTG1,CDC42,CFL2,CNN3,CCN2,EPB41L2,ITGB1,ITGB5,SMAD4,MYH9,MYH10,PFN2,PRKAR1A,RAC1,ROCK1,SDC4,TGFB3,TNNT2,ZYX,ROCK2,WDR1,PDCD6IP,LMOD1,ANKRD1,PHLDB2,SH3PXD2B,MYO18A
10_Member	GO Biological Processes	GO:0034332	adherens junction organization	-10.1296	-8.05873	24/140	25,118,1012,1495,1499,1500,1613,2017,3728,4035,5879,5962,6093,6385,7070,7414,7422,8394,8826,9448,9475,23499,23603,90102	ABL1,ADD1,CDH13,CTNNA1,CTNNB1,CTNND1,DAPK3,CTTN,JUP,LRP1,RAC1,RDX,ROCK1,SDC4,THY1,VCL,VEGFA,PIP5K1A,IQGAP1,MAP4K4,ROCK2,MACF1,CORO1C,PHLDB2
10_Member	GO Biological Processes	GO:0010811	positive regulation of cell-substrate adhesion	-10.0748	-8.01274	22/118	25,708,998,1012,2199,2335,3611,3655,3728,4739,4814,5879,6093,6385,7070,7422,8826,9448,10109,10519,84034,151887	ABL1,C1QBP,CDC42,CDH13,FBLN2,FN1,ILK,ITGA6,JUP,NEDD9,NINJ1,RAC1,ROCK1,SDC4,THY1,VEGFA,IQGAP1,MAP4K4,ARPC2,CIB1,EMILIN2,CCDC80
10_Member	GO Biological Processes	GO:0051017	actin filament bundle assembly	-9.18706	-7.21954	24/155	25,81,118,998,1490,1809,3688,3693,4430,4739,5217,5358,5879,5962,6093,6385,6624,7043,7184,7791,9475,51474,90102,285590	ABL1,ACTN4,ADD1,CDC42,CCN2,DPYSL3,ITGB1,ITGB5,MYO1B,NEDD9,PFN2,PLS3,RAC1,RDX,ROCK1,SDC4,FSCN1,TGFB3,HSP90B1,ZYX,ROCK2,LIMA1,PHLDB2,SH3PXD2B
10_Member	GO Biological Processes	GO:0001952	regulation of cell-matrix adhesion	-9.18556	-7.21954	21/119	25,1012,1613,3611,3728,4035,4814,5879,6093,6385,7070,7422,8573,8826,9448,9475,10519,10631,23499,23603,90102	ABL1,CDH13,DAPK3,ILK,JUP,LRP1,NINJ1,RAC1,ROCK1,SDC4,THY1,VEGFA,CASK,IQGAP1,MAP4K4,ROCK2,CIB1,POSTN,MACF1,CORO1C,PHLDB2
10_Member	GO Biological Processes	GO:1903391	regulation of adherens junction organization	-9.16045	-7.19619	16/67	25,118,1613,4035,5879,5962,6093,6385,7070,7422,8826,9448,9475,23499,23603,90102	ABL1,ADD1,DAPK3,LRP1,RAC1,RDX,ROCK1,SDC4,THY1,VEGFA,IQGAP1,MAP4K4,ROCK2,MACF1,CORO1C,PHLDB2
10_Member	GO Biological Processes	GO:0034333	adherens junction assembly	-8.95926	-7.00708	18/89	25,1499,1613,2017,4035,5879,6093,6385,7070,7414,7422,8394,8826,9448,9475,23499,23603,90102	ABL1,CTNNB1,DAPK3,CTTN,LRP1,RAC1,ROCK1,SDC4,THY1,VCL,VEGFA,PIP5K1A,IQGAP1,MAP4K4,ROCK2,MACF1,CORO1C,PHLDB2
10_Member	GO Biological Processes	GO:0061572	actin filament bundle organization	-8.95614	-7.00567	24/159	25,81,118,998,1490,1809,3688,3693,4430,4739,5217,5358,5879,5962,6093,6385,6624,7043,7184,7791,9475,51474,90102,285590	ABL1,ACTN4,ADD1,CDC42,CCN2,DPYSL3,ITGB1,ITGB5,MYO1B,NEDD9,PFN2,PLS3,RAC1,RDX,ROCK1,SDC4,FSCN1,TGFB3,HSP90B1,ZYX,ROCK2,LIMA1,PHLDB2,SH3PXD2B
10_Member	GO Biological Processes	GO:1901888	regulation of cell junction assembly	-8.0993	-6.21187	17/89	25,1613,2889,4035,4641,5879,6093,6385,6591,7070,7422,8826,9448,9475,23499,23603,90102	ABL1,DAPK3,RAPGEF1,LRP1,MYO1C,RAC1,ROCK1,SDC4,SNAI2,THY1,VEGFA,IQGAP1,MAP4K4,ROCK2,MACF1,CORO1C,PHLDB2
10_Member	GO Biological Processes	GO:0001954	positive regulation of cell-matrix adhesion	-8.04423	-6.16119	13/50	25,1012,3611,3728,4814,5879,6093,6385,7070,7422,8826,9448,10519	ABL1,CDH13,ILK,JUP,NINJ1,RAC1,ROCK1,SDC4,THY1,VEGFA,IQGAP1,MAP4K4,CIB1
10_Member	GO Biological Processes	GO:0048041	focal adhesion assembly	-7.9612	-6.09103	16/80	25,1613,2017,4035,5879,6093,6385,7070,7422,8394,8826,9448,9475,23499,23603,90102	ABL1,DAPK3,CTTN,LRP1,RAC1,ROCK1,SDC4,THY1,VEGFA,PIP5K1A,IQGAP1,MAP4K4,ROCK2,MACF1,CORO1C,PHLDB2
10_Member	GO Biological Processes	GO:0007045	cell-substrate adherens junction assembly	-7.9612	-6.09103	16/80	25,1613,2017,4035,5879,6093,6385,7070,7422,8394,8826,9448,9475,23499,23603,90102	ABL1,DAPK3,CTTN,LRP1,RAC1,ROCK1,SDC4,THY1,VEGFA,PIP5K1A,IQGAP1,MAP4K4,ROCK2,MACF1,CORO1C,PHLDB2
10_Member	GO Biological Processes	GO:0051893	regulation of focal adhesion assembly	-7.85387	-5.99895	14/61	25,1613,4035,5879,6093,6385,7070,7422,8826,9448,9475,23499,23603,90102	ABL1,DAPK3,LRP1,RAC1,ROCK1,SDC4,THY1,VEGFA,IQGAP1,MAP4K4,ROCK2,MACF1,CORO1C,PHLDB2
10_Member	GO Biological Processes	GO:0090109	regulation of cell-substrate junction assembly	-7.85387	-5.99895	14/61	25,1613,4035,5879,6093,6385,7070,7422,8826,9448,9475,23499,23603,90102	ABL1,DAPK3,LRP1,RAC1,ROCK1,SDC4,THY1,VEGFA,IQGAP1,MAP4K4,ROCK2,MACF1,CORO1C,PHLDB2
10_Member	GO Biological Processes	GO:1903393	positive regulation of adherens junction organization	-6.19344	-4.50331	9/31	25,118,5879,6093,6385,7070,7422,8826,9448	ABL1,ADD1,RAC1,ROCK1,SDC4,THY1,VEGFA,IQGAP1,MAP4K4
10_Member	GO Biological Processes	GO:0051894	positive regulation of focal adhesion assembly	-5.92521	-4.26886	8/25	25,5879,6093,6385,7070,7422,8826,9448	ABL1,RAC1,ROCK1,SDC4,THY1,VEGFA,IQGAP1,MAP4K4
10_Member	GO Biological Processes	GO:0045785	positive regulation of cell adhesion	-5.43568	-3.84561	33/401	25,101,301,708,960,972,998,1012,2199,2319,2335,2885,3485,3611,3655,3685,3728,4739,4814,5879,5914,6093,6385,7070,7422,8826,9448,9780,10109,10519,10630,84034,151887	ABL1,ADAM8,ANXA1,C1QBP,CD44,CD74,CDC42,CDH13,FBLN2,FLOT2,FN1,GRB2,IGFBP2,ILK,ITGA6,ITGAV,JUP,NEDD9,NINJ1,RAC1,RARA,ROCK1,SDC4,THY1,VEGFA,IQGAP1,MAP4K4,PIEZO1,ARPC2,CIB1,PDPN,EMILIN2,CCDC80
10_Member	GO Biological Processes	GO:0030038	contractile actin filament bundle assembly	-5.14985	-3.61002	14/99	25,998,1490,3688,3693,5217,5879,6093,6385,7043,7791,9475,90102,285590	ABL1,CDC42,CCN2,ITGB1,ITGB5,PFN2,RAC1,ROCK1,SDC4,TGFB3,ZYX,ROCK2,PHLDB2,SH3PXD2B
10_Member	GO Biological Processes	GO:0043149	stress fiber assembly	-5.14985	-3.61002	14/99	25,998,1490,3688,3693,5217,5879,6093,6385,7043,7791,9475,90102,285590	ABL1,CDC42,CCN2,ITGB1,ITGB5,PFN2,RAC1,ROCK1,SDC4,TGFB3,ZYX,ROCK2,PHLDB2,SH3PXD2B
10_Member	GO Biological Processes	GO:1901890	positive regulation of cell junction assembly	-4.92242	-3.4119	8/33	25,5879,6093,6385,7070,7422,8826,9448	ABL1,RAC1,ROCK1,SDC4,THY1,VEGFA,IQGAP1,MAP4K4
10_Member	GO Biological Processes	GO:0051496	positive regulation of stress fiber assembly	-4.21216	-2.7945	9/52	25,998,1490,5217,5879,6385,7043,9475,285590	ABL1,CDC42,CCN2,PFN2,RAC1,SDC4,TGFB3,ROCK2,SH3PXD2B
10_Member	GO Biological Processes	GO:0110020	regulation of actomyosin structure organization	-4.00924	-2.6217	12/95	25,998,1490,4089,5217,5879,6093,6385,7043,9475,90102,285590	ABL1,CDC42,CCN2,SMAD4,PFN2,RAC1,ROCK1,SDC4,TGFB3,ROCK2,PHLDB2,SH3PXD2B
10_Member	GO Biological Processes	GO:0032231	regulation of actin filament bundle assembly	-3.92099	-2.5459	12/97	25,998,1490,5217,5879,5962,6093,6385,7043,9475,90102,285590	ABL1,CDC42,CCN2,PFN2,RAC1,RDX,ROCK1,SDC4,TGFB3,ROCK2,PHLDB2,SH3PXD2B
10_Member	GO Biological Processes	GO:0051492	regulation of stress fiber assembly	-3.86462	-2.49801	11/84	25,998,1490,5217,5879,6093,6385,7043,9475,90102,285590	ABL1,CDC42,CCN2,PFN2,RAC1,ROCK1,SDC4,TGFB3,ROCK2,PHLDB2,SH3PXD2B
10_Member	GO Biological Processes	GO:0032233	positive regulation of actin filament bundle assembly	-3.60327	-2.27838	9/62	25,998,1490,5217,5879,6385,7043,9475,285590	ABL1,CDC42,CCN2,PFN2,RAC1,SDC4,TGFB3,ROCK2,SH3PXD2B
11_Summary	GO Biological Processes	GO:0070848	response to growth factor	-19.2759	-16.798	80/736	25,92,301,351,405,960,1277,1278,1284,1490,1499,1634,1655,1841,1915,1958,2200,2247,2353,2615,2719,2734,2885,2889,3066,3371,3611,3688,3693,3725,4053,4060,4089,4141,4193,4641,4670,4691,4851,4926,5045,5434,5641,5962,6093,6198,6233,6386,6464,6591,6678,7043,7072,7323,7422,7791,8322,8516,8573,8826,8828,9146,9475,9564,9775,10519,10631,11167,25878,27020,27063,27122,28996,51552,57154,58533,64855,85377,9099…	ABL1,ACVR2A,ANXA1,APP,ARNT,CD44,COL1A1,COL1A2,COL4A2,CCN2,CTNNB1,DCN,DDX5,DTYMK,EEF1A1,EGR1,FBN1,FGF2,FOS,LRRC32,GPC3,GLG1,GRB2,RAPGEF1,HDAC2,TNC,ILK,ITGB1,ITGB5,JUN,LTBP2,LUM,SMAD4,MARS,MDM2,MYO1C,HNRNPM,NCL,NOTCH1,NUMA1,FURIN,POLR2E,LGMN,RDX,ROCK1,RPS6KB1,RPS27A,SDCBP,SHC1,SNAI2,SPARC,TGFB3,TIA1,UBE2D3,VEGFA,ZYX,FZD4,ITGA8,CASK,IQGAP1,NRP2,HGS,ROCK2,BCAR1,EIF4A3,CIB1,POSTN,FSTL1,MXRA5,NPTN,ANKR…
11_Member	GO Biological Processes	GO:0070848	response to growth factor	-19.2759	-16.798	80/736	25,92,301,351,405,960,1277,1278,1284,1490,1499,1634,1655,1841,1915,1958,2200,2247,2353,2615,2719,2734,2885,2889,3066,3371,3611,3688,3693,3725,4053,4060,4089,4141,4193,4641,4670,4691,4851,4926,5045,5434,5641,5962,6093,6198,6233,6386,6464,6591,6678,7043,7072,7323,7422,7791,8322,8516,8573,8826,8828,9146,9475,9564,9775,10519,10631,11167,25878,27020,27063,27122,28996,51552,57154,58533,64855,85377,9099…	ABL1,ACVR2A,ANXA1,APP,ARNT,CD44,COL1A1,COL1A2,COL4A2,CCN2,CTNNB1,DCN,DDX5,DTYMK,EEF1A1,EGR1,FBN1,FGF2,FOS,LRRC32,GPC3,GLG1,GRB2,RAPGEF1,HDAC2,TNC,ILK,ITGB1,ITGB5,JUN,LTBP2,LUM,SMAD4,MARS,MDM2,MYO1C,HNRNPM,NCL,NOTCH1,NUMA1,FURIN,POLR2E,LGMN,RDX,ROCK1,RPS6KB1,RPS27A,SDCBP,SHC1,SNAI2,SPARC,TGFB3,TIA1,UBE2D3,VEGFA,ZYX,FZD4,ITGA8,CASK,IQGAP1,NRP2,HGS,ROCK2,BCAR1,EIF4A3,CIB1,POSTN,FSTL1,MXRA5,NPTN,ANKR…
11_Member	GO Biological Processes	GO:0071363	cellular response to growth factor stimulus	-17.5463	-15.0961	75/705	25,92,301,351,405,960,1277,1278,1284,1490,1499,1634,1655,1841,1915,1958,2200,2247,2353,2615,2719,2734,2885,2889,3066,3611,3688,3693,3725,4053,4089,4141,4193,4641,4670,4691,4851,4926,5045,5434,5641,5962,6198,6233,6386,6464,6591,6678,7043,7072,7323,7422,7791,8322,8516,8573,8826,8828,9146,9564,9775,10519,10631,11167,27020,27063,27122,28996,51552,57154,58533,64855,85377,90993,91851	ABL1,ACVR2A,ANXA1,APP,ARNT,CD44,COL1A1,COL1A2,COL4A2,CCN2,CTNNB1,DCN,DDX5,DTYMK,EEF1A1,EGR1,FBN1,FGF2,FOS,LRRC32,GPC3,GLG1,GRB2,RAPGEF1,HDAC2,ILK,ITGB1,ITGB5,JUN,LTBP2,SMAD4,MARS,MDM2,MYO1C,HNRNPM,NCL,NOTCH1,NUMA1,FURIN,POLR2E,LGMN,RDX,RPS6KB1,RPS27A,SDCBP,SHC1,SNAI2,SPARC,TGFB3,TIA1,UBE2D3,VEGFA,ZYX,FZD4,ITGA8,CASK,IQGAP1,NRP2,HGS,BCAR1,EIF4A3,CIB1,POSTN,FSTL1,NPTN,ANKRD1,DKK3,HIPK2,RAB14,SMURF1…
11_Member	GO Biological Processes	GO:0071559	response to transforming growth factor beta	-7.64545	-5.81601	29/258	92,1277,1278,1284,2200,2353,2615,2734,3066,3688,3693,3725,4053,4089,5045,6093,6233,6386,7043,7791,8516,9475,10631,25878,27063,27122,28996,57154,58533	ACVR2A,COL1A1,COL1A2,COL4A2,FBN1,FOS,LRRC32,GLG1,HDAC2,ITGB1,ITGB5,JUN,LTBP2,SMAD4,FURIN,ROCK1,RPS27A,SDCBP,TGFB3,ZYX,ITGA8,ROCK2,POSTN,MXRA5,ANKRD1,DKK3,HIPK2,SMURF1,SNX6
11_Member	GO Biological Processes	GO:0090287	regulation of cellular response to growth factor stimulus	-7.07041	-5.28688	30/290	25,92,405,1499,1634,2200,2247,2719,2734,3611,4089,4641,4851,4926,6233,6386,7043,7422,8322,8516,8573,9146,27020,27122,28996,57154,58533,64855,90993,91851	ABL1,ACVR2A,ARNT,CTNNB1,DCN,FBN1,FGF2,GPC3,GLG1,ILK,SMAD4,MYO1C,NOTCH1,NUMA1,RPS27A,SDCBP,TGFB3,VEGFA,FZD4,ITGA8,CASK,HGS,NPTN,DKK3,HIPK2,SMURF1,SNX6,FAM129B,CREB3L1,CHRDL1
11_Member	GO Biological Processes	GO:0007178	transmembrane receptor protein serine/threonine kinase signaling pathway	-6.7252	-4.97501	33/351	25,92,1278,1655,1958,2200,2353,2615,2719,2734,3611,3688,3693,3725,4053,4089,4851,4926,5045,6233,6386,7043,7323,7431,7791,8516,11167,27122,28996,57154,58533,60436,91851	ABL1,ACVR2A,COL1A2,DDX5,EGR1,FBN1,FOS,LRRC32,GPC3,GLG1,ILK,ITGB1,ITGB5,JUN,LTBP2,SMAD4,NOTCH1,NUMA1,FURIN,RPS27A,SDCBP,TGFB3,UBE2D3,VIM,ZYX,ITGA8,FSTL1,DKK3,HIPK2,SMURF1,SNX6,TGIF2,CHRDL1
11_Member	GO Biological Processes	GO:0071560	cellular response to transforming growth factor beta stimulus	-6.22455	-4.5248	26/251	92,1277,1278,1284,2200,2353,2615,2734,3066,3688,3693,3725,4053,4089,5045,6233,6386,7043,7791,8516,10631,27063,27122,28996,57154,58533	ACVR2A,COL1A1,COL1A2,COL4A2,FBN1,FOS,LRRC32,GLG1,HDAC2,ITGB1,ITGB5,JUN,LTBP2,SMAD4,FURIN,RPS27A,SDCBP,TGFB3,ZYX,ITGA8,POSTN,ANKRD1,DKK3,HIPK2,SMURF1,SNX6
11_Member	GO Biological Processes	GO:0007179	transforming growth factor beta receptor signaling pathway	-5.20832	-3.65849	21/201	92,1278,2200,2353,2615,2734,3688,3693,3725,4053,4089,5045,6233,6386,7043,7791,8516,27122,28996,57154,58533	ACVR2A,COL1A2,FBN1,FOS,LRRC32,GLG1,ITGB1,ITGB5,JUN,LTBP2,SMAD4,FURIN,RPS27A,SDCBP,TGFB3,ZYX,ITGA8,DKK3,HIPK2,SMURF1,SNX6
11_Member	GO Biological Processes	GO:0030510	regulation of BMP signaling pathway	-3.6821	-2.34581	11/88	25,92,2200,2719,3611,4089,4851,4926,28996,57154,91851	ABL1,ACVR2A,FBN1,GPC3,ILK,SMAD4,NOTCH1,NUMA1,HIPK2,SMURF1,CHRDL1
11_Member	GO Biological Processes	GO:0030509	BMP signaling pathway	-3.55847	-2.24034	15/154	25,92,1655,1958,2200,2719,3611,4089,4851,4926,7323,11167,28996,57154,91851	ABL1,ACVR2A,DDX5,EGR1,FBN1,GPC3,ILK,SMAD4,NOTCH1,NUMA1,UBE2D3,FSTL1,HIPK2,SMURF1,CHRDL1
11_Member	GO Biological Processes	GO:0090288	negative regulation of cellular response to growth factor stimulus	-3.2661	-1.99119	15/164	25,1634,2200,2734,4851,6233,7043,8573,9146,28996,57154,58533,64855,90993,91851	ABL1,DCN,FBN1,GLG1,NOTCH1,RPS27A,TGFB3,CASK,HGS,HIPK2,SMURF1,SNX6,FAM129B,CREB3L1,CHRDL1
11_Member	GO Biological Processes	GO:0071772	response to BMP	-3.18367	-1.92325	15/167	25,92,1655,1958,2200,2719,3611,4089,4851,4926,7323,11167,28996,57154,91851	ABL1,ACVR2A,DDX5,EGR1,FBN1,GPC3,ILK,SMAD4,NOTCH1,NUMA1,UBE2D3,FSTL1,HIPK2,SMURF1,CHRDL1
11_Member	GO Biological Processes	GO:0071773	cellular response to BMP stimulus	-3.18367	-1.92325	15/167	25,92,1655,1958,2200,2719,3611,4089,4851,4926,7323,11167,28996,57154,91851	ABL1,ACVR2A,DDX5,EGR1,FBN1,GPC3,ILK,SMAD4,NOTCH1,NUMA1,UBE2D3,FSTL1,HIPK2,SMURF1,CHRDL1
11_Member	GO Biological Processes	GO:0090092	regulation of transmembrane receptor protein serine/threonine kinase signaling pathway	-2.80097	-1.61399	18/239	25,92,2200,2719,2734,3611,4089,4851,4926,6233,6386,7043,8516,27122,28996,57154,58533,91851	ABL1,ACVR2A,FBN1,GPC3,GLG1,ILK,SMAD4,NOTCH1,NUMA1,RPS27A,SDCBP,TGFB3,ITGA8,DKK3,HIPK2,SMURF1,SNX6,CHRDL1
11_Member	GO Biological Processes	GO:0017015	regulation of transforming growth factor beta receptor signaling pathway	-2.55075	-1.40369	11/120	2200,2734,4089,6233,6386,7043,8516,27122,28996,57154,58533	FBN1,GLG1,SMAD4,RPS27A,SDCBP,TGFB3,ITGA8,DKK3,HIPK2,SMURF1,SNX6
11_Member	GO Biological Processes	GO:0090100	positive regulation of transmembrane receptor protein serine/threonine kinase signaling pathway	-2.54716	-1.4009	10/103	92,2719,3611,4089,4851,4926,6386,7043,8516,28996	ACVR2A,GPC3,ILK,SMAD4,NOTCH1,NUMA1,SDCBP,TGFB3,ITGA8,HIPK2
11_Member	GO Biological Processes	GO:1903844	regulation of cellular response to transforming growth factor beta stimulus	-2.49493	-1.36127	11/122	2200,2734,4089,6233,6386,7043,8516,27122,28996,57154,58533	FBN1,GLG1,SMAD4,RPS27A,SDCBP,TGFB3,ITGA8,DKK3,HIPK2,SMURF1,SNX6
11_Member	GO Biological Processes	GO:0030513	positive regulation of BMP signaling pathway	-2.35979	-1.25659	5/32	2719,3611,4089,4851,4926	GPC3,ILK,SMAD4,NOTCH1,NUMA1
12_Summary	GO Biological Processes	GO:0000904	cell morphogenesis involved in differentiation	-18.425	-15.9584	78/728	25,81,351,396,682,708,998,1291,1292,1293,1303,1499,1855,2017,2131,2335,2885,3251,3320,3475,3611,3685,3688,3912,3913,3915,4035,4076,4089,4627,4628,4739,4851,4891,5048,5306,5604,5786,5861,5879,6093,6152,6277,6383,6464,6586,6709,7070,7155,7414,7422,8301,8322,8516,8766,8828,9260,9948,10097,10109,10160,10519,10630,10631,10890,23011,23022,23499,23513,23603,25932,27020,51441,55740,57142,64855,79778,8489…	ABL1,ACTN4,APP,ARHGDIA,BSG,C1QBP,CDC42,COL6A1,COL6A2,COL6A3,COL12A1,CTNNB1,DVL1,CTTN,EXT1,FN1,GRB2,HPRT1,HSP90AA1,IFRD1,ILK,ITGAV,ITGB1,LAMB1,LAMB2,LAMC1,LRP1,CAPRIN1,SMAD4,MYH9,MYH10,NEDD9,NOTCH1,SLC11A2,PAFAH1B1,PITPNA,MAP2K1,PTPRA,RAB1A,RAC1,ROCK1,RPL24,S100A6,SDC2,SHC1,SLIT3,SPTAN1,THY1,TOP2B,VCL,VEGFA,PICALM,FZD4,ITGA8,RAB11A,NRP2,PDLIM7,WDR1,ACTR2,ARPC2,FARP1,CIB1,PDPN,POSTN,RAB10,RAB21,PAL…
12_Member	GO Biological Processes	GO:0000904	cell morphogenesis involved in differentiation	-18.425	-15.9584	78/728	25,81,351,396,682,708,998,1291,1292,1293,1303,1499,1855,2017,2131,2335,2885,3251,3320,3475,3611,3685,3688,3912,3913,3915,4035,4076,4089,4627,4628,4739,4851,4891,5048,5306,5604,5786,5861,5879,6093,6152,6277,6383,6464,6586,6709,7070,7155,7414,7422,8301,8322,8516,8766,8828,9260,9948,10097,10109,10160,10519,10630,10631,10890,23011,23022,23499,23513,23603,25932,27020,51441,55740,57142,64855,79778,84894	ABL1,ACTN4,APP,ARHGDIA,BSG,C1QBP,CDC42,COL6A1,COL6A2,COL6A3,COL12A1,CTNNB1,DVL1,CTTN,EXT1,FN1,GRB2,HPRT1,HSP90AA1,IFRD1,ILK,ITGAV,ITGB1,LAMB1,LAMB2,LAMC1,LRP1,CAPRIN1,SMAD4,MYH9,MYH10,NEDD9,NOTCH1,SLC11A2,PAFAH1B1,PITPNA,MAP2K1,PTPRA,RAB1A,RAC1,ROCK1,RPL24,S100A6,SDC2,SHC1,SLIT3,SPTAN1,THY1,TOP2B,VCL,VEGFA,PICALM,FZD4,ITGA8,RAB11A,NRP2,PDLIM7,WDR1,ACTR2,ARPC2,FARP1,CIB1,PDPN,POSTN,RAB10,RAB21,PAL…
12_Member	GO Biological Processes	GO:0120039	plasma membrane bounded cell projection morphogenesis	-12.7904	-10.532	63/654	25,351,396,682,960,998,1499,1855,2017,2131,2335,2885,3251,3320,3475,3611,3688,3913,4035,4076,4089,4628,4851,4891,5048,5306,5604,5786,5879,6093,6152,6277,6383,6464,6586,6709,7070,7155,7414,7422,8301,8322,8766,8826,8828,9260,9448,10097,10160,10630,10631,10890,23011,23022,23499,23603,27020,28988,55740,57142,57154,64855,84894	ABL1,APP,ARHGDIA,BSG,CD44,CDC42,CTNNB1,DVL1,CTTN,EXT1,FN1,GRB2,HPRT1,HSP90AA1,IFRD1,ILK,ITGB1,LAMB2,LRP1,CAPRIN1,SMAD4,MYH10,NOTCH1,SLC11A2,PAFAH1B1,PITPNA,MAP2K1,PTPRA,RAC1,ROCK1,RPL24,S100A6,SDC2,SHC1,SLIT3,SPTAN1,THY1,TOP2B,VCL,VEGFA,PICALM,FZD4,RAB11A,IQGAP1,NRP2,PDLIM7,MAP4K4,ACTR2,FARP1,PDPN,POSTN,RAB10,RAB21,PALLD,MACF1,CORO1C,NPTN,DBNL,ENAH,RTN4,SMURF1,FAM129B,LINGO1
12_Member	GO Biological Processes	GO:0048858	cell projection morphogenesis	-12.7307	-10.4812	63/656	25,351,396,682,960,998,1499,1855,2017,2131,2335,2885,3251,3320,3475,3611,3688,3913,4035,4076,4089,4628,4851,4891,5048,5306,5604,5786,5879,6093,6152,6277,6383,6464,6586,6709,7070,7155,7414,7422,8301,8322,8766,8826,8828,9260,9448,10097,10160,10630,10631,10890,23011,23022,23499,23603,27020,28988,55740,57142,57154,64855,84894	ABL1,APP,ARHGDIA,BSG,CD44,CDC42,CTNNB1,DVL1,CTTN,EXT1,FN1,GRB2,HPRT1,HSP90AA1,IFRD1,ILK,ITGB1,LAMB2,LRP1,CAPRIN1,SMAD4,MYH10,NOTCH1,SLC11A2,PAFAH1B1,PITPNA,MAP2K1,PTPRA,RAC1,ROCK1,RPL24,S100A6,SDC2,SHC1,SLIT3,SPTAN1,THY1,TOP2B,VCL,VEGFA,PICALM,FZD4,RAB11A,IQGAP1,NRP2,PDLIM7,MAP4K4,ACTR2,FARP1,PDPN,POSTN,RAB10,RAB21,PALLD,MACF1,CORO1C,NPTN,DBNL,ENAH,RTN4,SMURF1,FAM129B,LINGO1
12_Member	GO Biological Processes	GO:0032990	cell part morphogenesis	-12.6732	-10.4284	64/675	25,351,396,682,960,998,1499,1855,2017,2131,2335,2885,3251,3320,3475,3611,3688,3913,4035,4076,4089,4628,4851,4891,5048,5306,5604,5786,5879,6093,6152,6277,6383,6464,6586,6709,7070,7155,7414,7422,8301,8322,8766,8826,8828,9260,9448,10097,10160,10630,10631,10890,23011,23022,23499,23603,27020,28988,55022,55740,57142,57154,64855,84894	ABL1,APP,ARHGDIA,BSG,CD44,CDC42,CTNNB1,DVL1,CTTN,EXT1,FN1,GRB2,HPRT1,HSP90AA1,IFRD1,ILK,ITGB1,LAMB2,LRP1,CAPRIN1,SMAD4,MYH10,NOTCH1,SLC11A2,PAFAH1B1,PITPNA,MAP2K1,PTPRA,RAC1,ROCK1,RPL24,S100A6,SDC2,SHC1,SLIT3,SPTAN1,THY1,TOP2B,VCL,VEGFA,PICALM,FZD4,RAB11A,IQGAP1,NRP2,PDLIM7,MAP4K4,ACTR2,FARP1,PDPN,POSTN,RAB10,RAB21,PALLD,MACF1,CORO1C,NPTN,DBNL,PID1,ENAH,RTN4,SMURF1,FAM129B,LINGO1
12_Member	GO Biological Processes	GO:0048812	neuron projection morphogenesis	-11.6999	-9.52874	60/640	25,351,396,682,998,1499,1855,2017,2131,2335,2885,3251,3320,3475,3611,3688,3913,4035,4076,4089,4628,4851,4891,5048,5306,5604,5786,5879,6093,6152,6277,6383,6464,6586,6709,7070,7155,7414,7422,8301,8322,8766,8826,8828,9260,9448,10097,10160,10631,10890,23011,23022,23499,27020,28988,55740,57142,57154,64855,84894	ABL1,APP,ARHGDIA,BSG,CDC42,CTNNB1,DVL1,CTTN,EXT1,FN1,GRB2,HPRT1,HSP90AA1,IFRD1,ILK,ITGB1,LAMB2,LRP1,CAPRIN1,SMAD4,MYH10,NOTCH1,SLC11A2,PAFAH1B1,PITPNA,MAP2K1,PTPRA,RAC1,ROCK1,RPL24,S100A6,SDC2,SHC1,SLIT3,SPTAN1,THY1,TOP2B,VCL,VEGFA,PICALM,FZD4,RAB11A,IQGAP1,NRP2,PDLIM7,MAP4K4,ACTR2,FARP1,POSTN,RAB10,RAB21,PALLD,MACF1,NPTN,DBNL,ENAH,RTN4,SMURF1,FAM129B,LINGO1
12_Member	GO Biological Processes	GO:0048667	cell morphogenesis involved in neuron differentiation	-10.0915	-8.02501	53/576	25,351,396,682,998,1855,2017,2131,2335,2885,3251,3320,3475,3611,3688,3913,4035,4076,4089,4628,4851,4891,5048,5306,5604,5786,5879,6152,6277,6383,6464,6586,6709,7070,7155,7414,7422,8301,8766,8828,9260,10097,10160,10890,23011,23022,23499,23513,27020,55740,57142,64855,84894	ABL1,APP,ARHGDIA,BSG,CDC42,DVL1,CTTN,EXT1,FN1,GRB2,HPRT1,HSP90AA1,IFRD1,ILK,ITGB1,LAMB2,LRP1,CAPRIN1,SMAD4,MYH10,NOTCH1,SLC11A2,PAFAH1B1,PITPNA,MAP2K1,PTPRA,RAC1,RPL24,S100A6,SDC2,SHC1,SLIT3,SPTAN1,THY1,TOP2B,VCL,VEGFA,PICALM,RAB11A,NRP2,PDLIM7,ACTR2,FARP1,RAB10,RAB21,PALLD,MACF1,SCRIB,NPTN,ENAH,RTN4,FAM129B,LINGO1
12_Member	GO Biological Processes	GO:0061564	axon development	-10.0773	-8.01303	49/508	25,351,396,682,1495,1855,2017,2131,2335,2885,3320,3371,3475,3611,3688,3725,3913,4035,4089,4628,4851,5048,5306,5604,5786,5879,6152,6277,6464,6586,6709,7070,7155,7414,7422,8301,8766,8828,9260,10890,23011,23022,23499,27020,29956,55740,57142,64855,84894	ABL1,APP,ARHGDIA,BSG,CTNNA1,DVL1,CTTN,EXT1,FN1,GRB2,HSP90AA1,TNC,IFRD1,ILK,ITGB1,JUN,LAMB2,LRP1,SMAD4,MYH10,NOTCH1,PAFAH1B1,PITPNA,MAP2K1,PTPRA,RAC1,RPL24,S100A6,SHC1,SLIT3,SPTAN1,THY1,TOP2B,VCL,VEGFA,PICALM,RAB11A,NRP2,PDLIM7,RAB10,RAB21,PALLD,MACF1,NPTN,CERS2,ENAH,RTN4,FAM129B,LINGO1
12_Member	GO Biological Processes	GO:0007409	axonogenesis	-9.40716	-7.4158	45/463	25,351,396,682,1855,2017,2131,2335,2885,3320,3475,3611,3688,3913,4035,4089,4628,4851,5048,5306,5604,5786,5879,6152,6277,6464,6586,6709,7070,7155,7414,7422,8301,8766,8828,9260,10890,23011,23022,23499,27020,55740,57142,64855,84894	ABL1,APP,ARHGDIA,BSG,DVL1,CTTN,EXT1,FN1,GRB2,HSP90AA1,IFRD1,ILK,ITGB1,LAMB2,LRP1,SMAD4,MYH10,NOTCH1,PAFAH1B1,PITPNA,MAP2K1,PTPRA,RAC1,RPL24,S100A6,SHC1,SLIT3,SPTAN1,THY1,TOP2B,VCL,VEGFA,PICALM,RAB11A,NRP2,PDLIM7,RAB10,RAB21,PALLD,MACF1,NPTN,ENAH,RTN4,FAM129B,LINGO1
12_Member	GO Biological Processes	GO:0006935	chemotaxis	-4.05497	-2.66125	41/635	101,301,351,682,708,972,1012,1843,1855,2131,2247,2885,3685,3913,4035,4089,4282,4628,4851,5604,5641,5786,5879,6152,6223,6464,6586,6709,7422,8394,8729,8828,9260,9564,9750,10928,23022,23513,27020,55740,64855	ADAM8,ANXA1,APP,BSG,C1QBP,CD74,CDH13,DUSP1,DVL1,EXT1,FGF2,GRB2,ITGAV,LAMB2,LRP1,SMAD4,MIF,MYH10,NOTCH1,MAP2K1,LGMN,PTPRA,RAC1,RPL24,RPS19,SHC1,SLIT3,SPTAN1,VEGFA,PIP5K1A,GBF1,NRP2,PDLIM7,BCAR1,RIPOR2,RALBP1,PALLD,SCRIB,NPTN,ENAH,FAM129B
12_Member	GO Biological Processes	GO:0042330	taxis	-4.01065	-2.62178	41/638	101,301,351,682,708,972,1012,1843,1855,2131,2247,2885,3685,3913,4035,4089,4282,4628,4851,5604,5641,5786,5879,6152,6223,6464,6586,6709,7422,8394,8729,8828,9260,9564,9750,10928,23022,23513,27020,55740,64855	ADAM8,ANXA1,APP,BSG,C1QBP,CD74,CDH13,DUSP1,DVL1,EXT1,FGF2,GRB2,ITGAV,LAMB2,LRP1,SMAD4,MIF,MYH10,NOTCH1,MAP2K1,LGMN,PTPRA,RAC1,RPL24,RPS19,SHC1,SLIT3,SPTAN1,VEGFA,PIP5K1A,GBF1,NRP2,PDLIM7,BCAR1,RIPOR2,RALBP1,PALLD,SCRIB,NPTN,ENAH,FAM129B
12_Member	GO Biological Processes	GO:0007411	axon guidance	-3.76853	-2.41884	22/270	351,682,1855,2131,2885,3913,4035,4089,4628,5786,5879,6152,6464,6586,6709,7422,8828,9260,23022,27020,55740,64855	APP,BSG,DVL1,EXT1,GRB2,LAMB2,LRP1,SMAD4,MYH10,PTPRA,RAC1,RPL24,SHC1,SLIT3,SPTAN1,VEGFA,NRP2,PDLIM7,PALLD,NPTN,ENAH,FAM129B
12_Member	GO Biological Processes	GO:0097485	neuron projection guidance	-3.74568	-2.40106	22/271	351,682,1855,2131,2885,3913,4035,4089,4628,5786,5879,6152,6464,6586,6709,7422,8828,9260,23022,27020,55740,64855	APP,BSG,DVL1,EXT1,GRB2,LAMB2,LRP1,SMAD4,MYH10,PTPRA,RAC1,RPL24,SHC1,SLIT3,SPTAN1,VEGFA,NRP2,PDLIM7,PALLD,NPTN,ENAH,FAM129B
13_Summary	GO Biological Processes	GO:0070482	response to oxygen levels	-18.0955	-15.6344	55/395	81,101,191,405,468,665,1277,1490,1958,1978,2023,2782,3066,3099,3162,4000,4017,4089,4193,4654,4851,4891,5034,5066,5351,5352,5685,5689,5690,5695,5706,5707,5708,5709,5713,5719,6233,6513,7043,7184,7422,8994,9114,9475,9777,10449,10525,10631,10869,11331,22937,27063,28996,30001,50809,25,70,163,960,977,998,1173,1213,1291,1292,1293,1301,1303,1499,1512,1522,1855,2239,2247,2719,2821,2885,3371,3611,3688,4478…	ACTN4,ADAM8,AHCY,ARNT,ATF4,BNIP3L,COL1A1,CCN2,EGR1,EIF4EBP1,ENO1,GNB1,HDAC2,HK2,HMOX1,LMNA,LOXL2,SMAD4,MDM2,MYOD1,NOTCH1,SLC11A2,P4HB,PAM,PLOD1,PLOD2,PSMA4,PSMB1,PSMB2,PSMB7,PSMC6,PSMD1,PSMD2,PSMD3,PSMD7,PSMD13,RPS27A,SLC2A1,TGFB3,HSP90B1,VEGFA,LIMD1,ATP6V0D1,ROCK2,TM9SF4,ACAA2,HYOU1,POSTN,USP19,PHB2,SCAP,ANKRD1,HIPK2,ERO1A,HP1BP3,ABL1,ACTC1,AP2B1,CD44,CD151,CDC42,AP2M1,CLTC,COL6A1,COL6A2,COL6A3,…
13_Member	GO Biological Processes	GO:0070482	response to oxygen levels	-18.0955	-15.6344	55/395	81,101,191,405,468,665,1277,1490,1958,1978,2023,2782,3066,3099,3162,4000,4017,4089,4193,4654,4851,4891,5034,5066,5351,5352,5685,5689,5690,5695,5706,5707,5708,5709,5713,5719,6233,6513,7043,7184,7422,8994,9114,9475,9777,10449,10525,10631,10869,11331,22937,27063,28996,30001,50809	ACTN4,ADAM8,AHCY,ARNT,ATF4,BNIP3L,COL1A1,CCN2,EGR1,EIF4EBP1,ENO1,GNB1,HDAC2,HK2,HMOX1,LMNA,LOXL2,SMAD4,MDM2,MYOD1,NOTCH1,SLC11A2,P4HB,PAM,PLOD1,PLOD2,PSMA4,PSMB1,PSMB2,PSMB7,PSMC6,PSMD1,PSMD2,PSMD3,PSMD7,PSMD13,RPS27A,SLC2A1,TGFB3,HSP90B1,VEGFA,LIMD1,ATP6V0D1,ROCK2,TM9SF4,ACAA2,HYOU1,POSTN,USP19,PHB2,SCAP,ANKRD1,HIPK2,ERO1A,HP1BP3
13_Member	GO Biological Processes	GO:0048729	tissue morphogenesis	-16.7057	-14.2764	71/665	25,70,163,960,977,998,1173,1213,1291,1292,1293,1301,1303,1499,1512,1522,1855,2239,2247,2719,2821,2885,3371,3611,3688,4089,4193,4478,4634,4851,5048,5499,5573,5685,5689,5690,5695,5706,5707,5708,5709,5713,5719,5879,5914,6201,6385,6591,7043,7135,7139,7414,7422,8322,8516,8828,9021,9948,10630,10890,10959,11331,23275,23513,25932,27063,57154,79971,83605,90102,115908	ABL1,ACTC1,AP2B1,CD44,CD151,CDC42,AP2M1,CLTC,COL6A1,COL6A2,COL6A3,COL11A1,COL12A1,CTNNB1,CTSH,CTSZ,DVL1,GPC4,FGF2,GPC3,GPI,GRB2,TNC,ILK,ITGB1,SMAD4,MDM2,MSN,MYL3,NOTCH1,PAFAH1B1,PPP1CA,PRKAR1A,PSMA4,PSMB1,PSMB2,PSMB7,PSMC6,PSMD1,PSMD2,PSMD3,PSMD7,PSMD13,RAC1,RARA,RPS7,SDC4,SNAI2,TGFB3,TNNI1,TNNT2,VCL,VEGFA,FZD4,ITGA8,NRP2,SOCS3,WDR1,PDPN,RAB10,TMED2,PHB2,POFUT2,SCRIB,CLIC4,ANKRD1,SMURF1,WLS,CCM2,…
13_Member	GO Biological Processes	GO:0036293	response to decreased oxygen levels	-16.5734	-14.1542	51/371	81,101,191,405,468,665,1490,1958,1978,2023,2782,3099,3162,4000,4017,4089,4193,4851,4891,5034,5066,5351,5352,5685,5689,5690,5695,5706,5707,5708,5709,5713,5719,6233,6513,7043,7184,7422,8994,9475,9777,10449,10525,10631,10869,11331,22937,27063,28996,30001,50809	ACTN4,ADAM8,AHCY,ARNT,ATF4,BNIP3L,CCN2,EGR1,EIF4EBP1,ENO1,GNB1,HK2,HMOX1,LMNA,LOXL2,SMAD4,MDM2,NOTCH1,SLC11A2,P4HB,PAM,PLOD1,PLOD2,PSMA4,PSMB1,PSMB2,PSMB7,PSMC6,PSMD1,PSMD2,PSMD3,PSMD7,PSMD13,RPS27A,SLC2A1,TGFB3,HSP90B1,VEGFA,LIMD1,ROCK2,TM9SF4,ACAA2,HYOU1,POSTN,USP19,PHB2,SCAP,ANKRD1,HIPK2,ERO1A,HP1BP3
13_Member	GO Biological Processes	GO:0001666	response to hypoxia	-15.7663	-13.3761	49/360	81,101,191,405,665,1958,1978,2023,2782,3099,3162,4000,4017,4089,4193,4851,4891,5034,5066,5351,5352,5685,5689,5690,5695,5706,5707,5708,5709,5713,5719,6233,6513,7043,7184,7422,8994,9475,9777,10449,10525,10631,10869,11331,22937,27063,28996,30001,50809	ACTN4,ADAM8,AHCY,ARNT,BNIP3L,EGR1,EIF4EBP1,ENO1,GNB1,HK2,HMOX1,LMNA,LOXL2,SMAD4,MDM2,NOTCH1,SLC11A2,P4HB,PAM,PLOD1,PLOD2,PSMA4,PSMB1,PSMB2,PSMB7,PSMC6,PSMD1,PSMD2,PSMD3,PSMD7,PSMD13,RPS27A,SLC2A1,TGFB3,HSP90B1,VEGFA,LIMD1,ROCK2,TM9SF4,ACAA2,HYOU1,POSTN,USP19,PHB2,SCAP,ANKRD1,HIPK2,ERO1A,HP1BP3
13_Member	GO Biological Processes	GO:1903311	regulation of mRNA metabolic process	-14.8026	-12.4439	45/325	708,1153,1655,1981,3181,3192,3312,4154,4654,4670,4869,4904,5685,5689,5690,5695,5706,5707,5708,5709,5713,5719,6093,6233,6418,6430,6431,6651,6830,7072,7431,7529,7832,8087,8531,9475,9588,9967,10181,23019,23034,23367,23589,27339,51441	C1QBP,CIRBP,DDX5,EIF4G1,HNRNPA2B1,HNRNPU,HSPA8,MBNL1,MYOD1,HNRNPM,NPM1,YBX1,PSMA4,PSMB1,PSMB2,PSMB7,PSMC6,PSMD1,PSMD2,PSMD3,PSMD7,PSMD13,ROCK1,RPS27A,SET,SRSF5,SRSF6,SON,SUPT6H,TIA1,VIM,YWHAB,BTG2,FXR1,YBX3,ROCK2,PRDX6,THRAP3,RBM5,CNOT1,SAMD4A,LARP1,CARHSP1,PRPF19,YTHDF2
13_Member	GO Biological Processes	GO:0071453	cellular response to oxygen levels	-14.0492	-11.7075	37/235	101,405,468,665,1958,1978,2023,2782,3162,4000,4193,4654,4851,5034,5685,5689,5690,5695,5706,5707,5708,5709,5713,5719,6233,7422,8994,9114,9475,10449,10525,10869,11331,27063,28996,30001,50809	ADAM8,ARNT,ATF4,BNIP3L,EGR1,EIF4EBP1,ENO1,GNB1,HMOX1,LMNA,MDM2,MYOD1,NOTCH1,P4HB,PSMA4,PSMB1,PSMB2,PSMB7,PSMC6,PSMD1,PSMD2,PSMD3,PSMD7,PSMD13,RPS27A,VEGFA,LIMD1,ATP6V0D1,ROCK2,ACAA2,HYOU1,USP19,PHB2,ANKRD1,HIPK2,ERO1A,HP1BP3
13_Member	GO Biological Processes	GO:0036294	cellular response to decreased oxygen levels	-13.5847	-11.2594	35/218	101,405,468,665,1958,1978,2023,2782,3162,4000,4193,4851,5034,5685,5689,5690,5695,5706,5707,5708,5709,5713,5719,6233,7422,8994,9475,10449,10525,10869,11331,27063,28996,30001,50809	ADAM8,ARNT,ATF4,BNIP3L,EGR1,EIF4EBP1,ENO1,GNB1,HMOX1,LMNA,MDM2,NOTCH1,P4HB,PSMA4,PSMB1,PSMB2,PSMB7,PSMC6,PSMD1,PSMD2,PSMD3,PSMD7,PSMD13,RPS27A,VEGFA,LIMD1,ROCK2,ACAA2,HYOU1,USP19,PHB2,ANKRD1,HIPK2,ERO1A,HP1BP3
13_Member	GO Biological Processes	GO:0071456	cellular response to hypoxia	-13.4498	-11.1403	34/208	101,405,665,1958,1978,2023,2782,3162,4000,4193,4851,5034,5685,5689,5690,5695,5706,5707,5708,5709,5713,5719,6233,7422,8994,9475,10449,10525,10869,11331,27063,28996,30001,50809	ADAM8,ARNT,BNIP3L,EGR1,EIF4EBP1,ENO1,GNB1,HMOX1,LMNA,MDM2,NOTCH1,P4HB,PSMA4,PSMB1,PSMB2,PSMB7,PSMC6,PSMD1,PSMD2,PSMD3,PSMD7,PSMD13,RPS27A,VEGFA,LIMD1,ROCK2,ACAA2,HYOU1,USP19,PHB2,ANKRD1,HIPK2,ERO1A,HP1BP3
13_Member	GO Biological Processes	GO:0061013	regulation of mRNA catabolic process	-12.5557	-10.3176	32/198	1153,1981,3192,3312,4670,4869,4904,5685,5689,5690,5695,5706,5707,5708,5709,5713,5719,6093,6233,6418,7431,7529,7832,8087,8531,9475,9967,23019,23034,23367,23589,51441	CIRBP,EIF4G1,HNRNPU,HSPA8,HNRNPM,NPM1,YBX1,PSMA4,PSMB1,PSMB2,PSMB7,PSMC6,PSMD1,PSMD2,PSMD3,PSMD7,PSMD13,ROCK1,RPS27A,SET,VIM,YWHAB,BTG2,FXR1,YBX3,ROCK2,THRAP3,CNOT1,SAMD4A,LARP1,CARHSP1,YTHDF2
13_Member	GO Biological Processes	GO:0043488	regulation of mRNA stability	-12.4315	-10.2063	30/176	1153,1981,3192,3312,4670,4869,4904,5685,5689,5690,5695,5706,5707,5708,5709,5713,5719,6093,6233,6418,7431,7529,8087,8531,9475,9967,23034,23367,23589,51441	CIRBP,EIF4G1,HNRNPU,HSPA8,HNRNPM,NPM1,YBX1,PSMA4,PSMB1,PSMB2,PSMB7,PSMC6,PSMD1,PSMD2,PSMD3,PSMD7,PSMD13,ROCK1,RPS27A,SET,VIM,YWHAB,FXR1,YBX3,ROCK2,THRAP3,SAMD4A,LARP1,CARHSP1,YTHDF2
13_Member	GO Biological Processes	GO:0043487	regulation of RNA stability	-12.0396	-9.8423	30/182	1153,1981,3192,3312,4670,4869,4904,5685,5689,5690,5695,5706,5707,5708,5709,5713,5719,6093,6233,6418,7431,7529,8087,8531,9475,9967,23034,23367,23589,51441	CIRBP,EIF4G1,HNRNPU,HSPA8,HNRNPM,NPM1,YBX1,PSMA4,PSMB1,PSMB2,PSMB7,PSMC6,PSMD1,PSMD2,PSMD3,PSMD7,PSMD13,ROCK1,RPS27A,SET,VIM,YWHAB,FXR1,YBX3,ROCK2,THRAP3,SAMD4A,LARP1,CARHSP1,YTHDF2
13_Member	GO Biological Processes	GO:0016055	Wnt signaling pathway	-11.9064	-9.71798	53/516	25,163,351,527,998,1173,1213,1277,1499,1500,1613,1642,1855,1958,2239,2719,2782,2889,3065,3485,3611,3728,4035,4851,5204,5499,5685,5689,5690,5695,5706,5707,5708,5709,5713,5719,5879,6233,6382,6591,6597,7415,8322,8994,9275,10159,23499,27122,30851,57154,64359,79971,115908	ABL1,AP2B1,APP,ATP6V0C,CDC42,AP2M1,CLTC,COL1A1,CTNNB1,CTNND1,DAPK3,DDB1,DVL1,EGR1,GPC4,GPC3,GNB1,RAPGEF1,HDAC1,IGFBP2,ILK,JUP,LRP1,NOTCH1,PFDN5,PPP1CA,PSMA4,PSMB1,PSMB2,PSMB7,PSMC6,PSMD1,PSMD2,PSMD3,PSMD7,PSMD13,RAC1,RPS27A,SDC1,SNAI2,SMARCA4,VCP,FZD4,LIMD1,BCL7B,ATP6AP2,MACF1,DKK3,TAX1BP3,SMURF1,NXN,WLS,CTHRC1
13_Member	GO Biological Processes	GO:0198738	cell-cell signaling by wnt	-11.8408	-9.65524	53/518	25,163,351,527,998,1173,1213,1277,1499,1500,1613,1642,1855,1958,2239,2719,2782,2889,3065,3485,3611,3728,4035,4851,5204,5499,5685,5689,5690,5695,5706,5707,5708,5709,5713,5719,5879,6233,6382,6591,6597,7415,8322,8994,9275,10159,23499,27122,30851,57154,64359,79971,115908	ABL1,AP2B1,APP,ATP6V0C,CDC42,AP2M1,CLTC,COL1A1,CTNNB1,CTNND1,DAPK3,DDB1,DVL1,EGR1,GPC4,GPC3,GNB1,RAPGEF1,HDAC1,IGFBP2,ILK,JUP,LRP1,NOTCH1,PFDN5,PPP1CA,PSMA4,PSMB1,PSMB2,PSMB7,PSMC6,PSMD1,PSMD2,PSMD3,PSMD7,PSMD13,RAC1,RPS27A,SDC1,SNAI2,SMARCA4,VCP,FZD4,LIMD1,BCL7B,ATP6AP2,MACF1,DKK3,TAX1BP3,SMURF1,NXN,WLS,CTHRC1
13_Member	GO Biological Processes	GO:0001738	morphogenesis of a polarized epithelium	-11.6718	-9.50619	26/141	25,163,998,1173,1213,1855,2239,2719,4478,5048,5685,5689,5690,5695,5706,5707,5708,5709,5713,5719,5879,8322,9948,10890,57154,115908	ABL1,AP2B1,CDC42,AP2M1,CLTC,DVL1,GPC4,GPC3,MSN,PAFAH1B1,PSMA4,PSMB1,PSMB2,PSMB7,PSMC6,PSMD1,PSMD2,PSMD3,PSMD7,PSMD13,RAC1,FZD4,WDR1,RAB10,SMURF1,CTHRC1
13_Member	GO Biological Processes	GO:0001736	establishment of planar polarity	-11.3742	-9.22234	24/123	25,163,998,1173,1213,1855,2239,2719,5048,5685,5689,5690,5695,5706,5707,5708,5709,5713,5719,5879,8322,9948,57154,115908	ABL1,AP2B1,CDC42,AP2M1,CLTC,DVL1,GPC4,GPC3,PAFAH1B1,PSMA4,PSMB1,PSMB2,PSMB7,PSMC6,PSMD1,PSMD2,PSMD3,PSMD7,PSMD13,RAC1,FZD4,WDR1,SMURF1,CTHRC1
13_Member	GO Biological Processes	GO:0007164	establishment of tissue polarity	-11.3742	-9.22234	24/123	25,163,998,1173,1213,1855,2239,2719,5048,5685,5689,5690,5695,5706,5707,5708,5709,5713,5719,5879,8322,9948,57154,115908	ABL1,AP2B1,CDC42,AP2M1,CLTC,DVL1,GPC4,GPC3,PAFAH1B1,PSMA4,PSMB1,PSMB2,PSMB7,PSMC6,PSMD1,PSMD2,PSMD3,PSMD7,PSMD13,RAC1,FZD4,WDR1,SMURF1,CTHRC1
13_Member	GO Biological Processes	GO:0002009	morphogenesis of an epithelium	-10.9676	-8.84444	52/529	25,163,960,977,998,1173,1213,1499,1512,1522,1855,2239,2247,2719,2885,3371,3611,4089,4478,4851,5048,5499,5685,5689,5690,5695,5706,5707,5708,5709,5713,5719,5879,5914,6201,6385,6591,7414,7422,8322,9021,9948,10630,10890,10959,11331,23513,25932,57154,83605,90102,115908	ABL1,AP2B1,CD44,CD151,CDC42,AP2M1,CLTC,CTNNB1,CTSH,CTSZ,DVL1,GPC4,FGF2,GPC3,GRB2,TNC,ILK,SMAD4,MSN,NOTCH1,PAFAH1B1,PPP1CA,PSMA4,PSMB1,PSMB2,PSMB7,PSMC6,PSMD1,PSMD2,PSMD3,PSMD7,PSMD13,RAC1,RARA,RPS7,SDC4,SNAI2,VCL,VEGFA,FZD4,SOCS3,WDR1,PDPN,RAB10,TMED2,PHB2,SCRIB,CLIC4,SMURF1,CCM2,PHLDB2,CTHRC1
13_Member	GO Biological Processes	GO:0060071	Wnt signaling pathway, planar cell polarity pathway	-10.9555	-8.83486	22/107	25,163,998,1173,1213,1855,2239,2719,5685,5689,5690,5695,5706,5707,5708,5709,5713,5719,5879,8322,57154,115908	ABL1,AP2B1,CDC42,AP2M1,CLTC,DVL1,GPC4,GPC3,PSMA4,PSMB1,PSMB2,PSMB7,PSMC6,PSMD1,PSMD2,PSMD3,PSMD7,PSMD13,RAC1,FZD4,SMURF1,CTHRC1
13_Member	GO Biological Processes	GO:0090175	regulation of establishment of planar polarity	-10.7868	-8.67853	22/109	25,163,998,1173,1213,1855,2239,2719,5685,5689,5690,5695,5706,5707,5708,5709,5713,5719,5879,8322,57154,115908	ABL1,AP2B1,CDC42,AP2M1,CLTC,DVL1,GPC4,GPC3,PSMA4,PSMB1,PSMB2,PSMB7,PSMC6,PSMD1,PSMD2,PSMD3,PSMD7,PSMD13,RAC1,FZD4,SMURF1,CTHRC1
13_Member	GO Biological Processes	GO:0030111	regulation of Wnt signaling pathway	-10.2253	-8.14984	40/358	25,351,527,1277,1499,1500,1613,1855,1958,2719,2889,3065,3485,3611,3728,4035,4851,5204,5499,5685,5689,5690,5695,5706,5707,5708,5709,5713,5719,6591,6597,7415,8994,10159,23499,27122,30851,64359,79971,115908	ABL1,APP,ATP6V0C,COL1A1,CTNNB1,CTNND1,DAPK3,DVL1,EGR1,GPC3,RAPGEF1,HDAC1,IGFBP2,ILK,JUP,LRP1,NOTCH1,PFDN5,PPP1CA,PSMA4,PSMB1,PSMB2,PSMB7,PSMC6,PSMD1,PSMD2,PSMD3,PSMD7,PSMD13,SNAI2,SMARCA4,VCP,LIMD1,ATP6AP2,MACF1,DKK3,TAX1BP3,NXN,WLS,CTHRC1
13_Member	GO Biological Processes	GO:1905330	regulation of morphogenesis of an epithelium	-9.98648	-7.93952	27/179	25,163,998,1173,1213,1499,1855,2239,2719,5685,5689,5690,5695,5706,5707,5708,5709,5713,5719,5879,6591,7422,8322,11331,57154,90102,115908	ABL1,AP2B1,CDC42,AP2M1,CLTC,CTNNB1,DVL1,GPC4,GPC3,PSMA4,PSMB1,PSMB2,PSMB7,PSMC6,PSMD1,PSMD2,PSMD3,PSMD7,PSMD13,RAC1,SNAI2,VEGFA,FZD4,PHB2,SMURF1,PHLDB2,CTHRC1
13_Member	GO Biological Processes	GO:2000027	regulation of animal organ morphogenesis	-9.66491	-7.63864	32/253	25,163,998,1173,1213,1499,1855,2239,2719,4089,4851,5447,5685,5689,5690,5695,5706,5707,5708,5709,5713,5719,5879,6431,6591,7043,7422,8322,11331,55679,57154,115908	ABL1,AP2B1,CDC42,AP2M1,CLTC,CTNNB1,DVL1,GPC4,GPC3,SMAD4,NOTCH1,POR,PSMA4,PSMB1,PSMB2,PSMB7,PSMC6,PSMD1,PSMD2,PSMD3,PSMD7,PSMD13,RAC1,SRSF6,SNAI2,TGFB3,VEGFA,FZD4,PHB2,LIMS2,SMURF1,CTHRC1
13_Member	GO Biological Processes	GO:0035567	non-canonical Wnt signaling pathway	-9.54886	-7.5365	24/149	25,163,998,1173,1213,1499,1855,2239,2719,2782,5685,5689,5690,5695,5706,5707,5708,5709,5713,5719,5879,8322,57154,115908	ABL1,AP2B1,CDC42,AP2M1,CLTC,CTNNB1,DVL1,GPC4,GPC3,GNB1,PSMA4,PSMB1,PSMB2,PSMB7,PSMC6,PSMD1,PSMD2,PSMD3,PSMD7,PSMD13,RAC1,FZD4,SMURF1,CTHRC1
13_Member	GO Biological Processes	GO:1905114	cell surface receptor signaling pathway involved in cell-cell signaling	-9.39138	-7.40188	54/620	25,163,351,527,998,1173,1213,1277,1499,1500,1613,1642,1855,1958,2239,2719,2782,2889,3065,3485,3611,3728,4035,4851,5204,5499,5685,5689,5690,5695,5706,5707,5708,5709,5713,5719,5879,6233,6382,6591,6597,7415,8322,8994,9275,9775,10159,23499,27122,30851,57154,64359,79971,115908	ABL1,AP2B1,APP,ATP6V0C,CDC42,AP2M1,CLTC,COL1A1,CTNNB1,CTNND1,DAPK3,DDB1,DVL1,EGR1,GPC4,GPC3,GNB1,RAPGEF1,HDAC1,IGFBP2,ILK,JUP,LRP1,NOTCH1,PFDN5,PPP1CA,PSMA4,PSMB1,PSMB2,PSMB7,PSMC6,PSMD1,PSMD2,PSMD3,PSMD7,PSMD13,RAC1,RPS27A,SDC1,SNAI2,SMARCA4,VCP,FZD4,LIMD1,BCL7B,EIF4A3,ATP6AP2,MACF1,DKK3,TAX1BP3,SMURF1,NXN,WLS,CTHRC1
13_Member	GO Biological Processes	GO:0043618	regulation of transcription from RNA polymerase II promoter in response to stress	-9.18556	-7.21954	21/119	405,468,1051,1958,3162,3725,4851,5685,5689,5690,5695,5706,5707,5708,5709,5713,5719,6233,7422,8994,90993	ARNT,ATF4,CEBPB,EGR1,HMOX1,JUN,NOTCH1,PSMA4,PSMB1,PSMB2,PSMB7,PSMC6,PSMD1,PSMD2,PSMD3,PSMD7,PSMD13,RPS27A,VEGFA,LIMD1,CREB3L1
13_Member	GO Biological Processes	GO:0043620	regulation of DNA-templated transcription in response to stress	-8.77962	-6.83921	21/125	405,468,1051,1958,3162,3725,4851,5685,5689,5690,5695,5706,5707,5708,5709,5713,5719,6233,7422,8994,90993	ARNT,ATF4,CEBPB,EGR1,HMOX1,JUN,NOTCH1,PSMA4,PSMB1,PSMB2,PSMB7,PSMC6,PSMD1,PSMD2,PSMD3,PSMD7,PSMD13,RPS27A,VEGFA,LIMD1,CREB3L1
13_Member	GO Biological Processes	GO:0061418	regulation of transcription from RNA polymerase II promoter in response to hypoxia	-8.30167	-6.3978	16/76	405,1958,4851,5685,5689,5690,5695,5706,5707,5708,5709,5713,5719,6233,7422,8994	ARNT,EGR1,NOTCH1,PSMA4,PSMB1,PSMB2,PSMB7,PSMC6,PSMD1,PSMD2,PSMD3,PSMD7,PSMD13,RPS27A,VEGFA,LIMD1
13_Member	GO Biological Processes	GO:0060828	regulation of canonical Wnt signaling pathway	-7.93526	-6.06791	31/281	1277,1499,1500,1613,1855,1958,2719,2889,3065,3485,3611,3728,4851,5204,5499,5685,5689,5690,5695,5706,5707,5708,5709,5713,5719,6591,7415,8994,27122,79971,115908	COL1A1,CTNNB1,CTNND1,DAPK3,DVL1,EGR1,GPC3,RAPGEF1,HDAC1,IGFBP2,ILK,JUP,NOTCH1,PFDN5,PPP1CA,PSMA4,PSMB1,PSMB2,PSMB7,PSMC6,PSMD1,PSMD2,PSMD3,PSMD7,PSMD13,SNAI2,VCP,LIMD1,DKK3,WLS,CTHRC1
13_Member	GO Biological Processes	GO:0030178	negative regulation of Wnt signaling pathway	-7.78008	-5.93057	26/210	1500,1855,1958,2719,2889,3065,3485,4035,4851,5204,5685,5689,5690,5695,5706,5707,5708,5709,5713,5719,6591,8994,27122,30851,64359,115908	CTNND1,DVL1,EGR1,GPC3,RAPGEF1,HDAC1,IGFBP2,LRP1,NOTCH1,PFDN5,PSMA4,PSMB1,PSMB2,PSMB7,PSMC6,PSMD1,PSMD2,PSMD3,PSMD7,PSMD13,SNAI2,LIMD1,DKK3,TAX1BP3,NXN,CTHRC1
13_Member	KEGG Pathway	hsa03050	Proteasome	-7.60699	-5.7823	12/45	5685,5689,5690,5695,5706,5707,5708,5709,5713,5719,11047,51371	PSMA4,PSMB1,PSMB2,PSMB7,PSMC6,PSMD1,PSMD2,PSMD3,PSMD7,PSMD13,ADRM1,POMP
13_Member	GO Biological Processes	GO:0002474	antigen processing and presentation of peptide antigen via MHC class I	-7.58274	-5.75931	17/96	567,821,2923,3685,3693,5685,5689,5690,5695,5706,5707,5708,5709,5713,5719,6396,22872	B2M,CANX,PDIA3,ITGAV,ITGB5,PSMA4,PSMB1,PSMB2,PSMB7,PSMC6,PSMD1,PSMD2,PSMD3,PSMD7,PSMD13,SEC13,SEC31A
13_Member	GO Biological Processes	GO:0060070	canonical Wnt signaling pathway	-7.38888	-5.58284	33/329	1277,1499,1500,1613,1855,1958,2719,2889,3065,3485,3611,3728,4851,5204,5499,5685,5689,5690,5695,5706,5707,5708,5709,5713,5719,6382,6591,7415,8322,8994,27122,79971,115908	COL1A1,CTNNB1,CTNND1,DAPK3,DVL1,EGR1,GPC3,RAPGEF1,HDAC1,IGFBP2,ILK,JUP,NOTCH1,PFDN5,PPP1CA,PSMA4,PSMB1,PSMB2,PSMB7,PSMC6,PSMD1,PSMD2,PSMD3,PSMD7,PSMD13,SDC1,SNAI2,VCP,FZD4,LIMD1,DKK3,WLS,CTHRC1
13_Member	GO Biological Processes	GO:0090090	negative regulation of canonical Wnt signaling pathway	-7.3494	-5.54577	23/177	1500,1855,1958,2719,2889,3065,3485,4851,5204,5685,5689,5690,5695,5706,5707,5708,5709,5713,5719,6591,8994,27122,115908	CTNND1,DVL1,EGR1,GPC3,RAPGEF1,HDAC1,IGFBP2,NOTCH1,PFDN5,PSMA4,PSMB1,PSMB2,PSMB7,PSMC6,PSMD1,PSMD2,PSMD3,PSMD7,PSMD13,SNAI2,LIMD1,DKK3,CTHRC1
13_Member	GO Biological Processes	GO:0030177	positive regulation of Wnt signaling pathway	-6.84513	-5.08301	22/174	25,527,1277,1613,2719,3611,3728,5685,5689,5690,5695,5706,5707,5708,5709,5713,5719,6597,7415,10159,23499,79971	ABL1,ATP6V0C,COL1A1,DAPK3,GPC3,ILK,JUP,PSMA4,PSMB1,PSMB2,PSMB7,PSMC6,PSMD1,PSMD2,PSMD3,PSMD7,PSMD13,SMARCA4,VCP,ATP6AP2,MACF1,WLS
13_Member	GO Biological Processes	GO:0002479	antigen processing and presentation of exogenous peptide antigen via MHC class I, TAP-dependent	-6.65076	-4.90694	14/75	567,2923,3685,3693,5685,5689,5690,5695,5706,5707,5708,5709,5713,5719	B2M,PDIA3,ITGAV,ITGB5,PSMA4,PSMB1,PSMB2,PSMB7,PSMC6,PSMD1,PSMD2,PSMD3,PSMD7,PSMD13
13_Member	GO Biological Processes	GO:0042590	antigen processing and presentation of exogenous peptide antigen via MHC class I	-6.35968	-4.64638	14/79	567,2923,3685,3693,5685,5689,5690,5695,5706,5707,5708,5709,5713,5719	B2M,PDIA3,ITGAV,ITGB5,PSMA4,PSMB1,PSMB2,PSMB7,PSMC6,PSMD1,PSMD2,PSMD3,PSMD7,PSMD13
13_Member	GO Biological Processes	GO:0034612	response to tumor necrosis factor	-5.91447	-4.26162	29/311	81,427,965,1277,2937,3611,4654,5685,5689,5690,5695,5706,5707,5708,5709,5713,5719,6198,8531,8771,10519,10594,10631,27063,54469,55022,58509,60401,84888	ACTN4,ASAH1,CD58,COL1A1,GSS,ILK,MYOD1,PSMA4,PSMB1,PSMB2,PSMB7,PSMC6,PSMD1,PSMD2,PSMD3,PSMD7,PSMD13,RPS6KB1,YBX3,TNFRSF6B,CIB1,PRPF8,POSTN,ANKRD1,ZFAND6,PID1,CACTIN,EDA2R,SPPL2A
13_Member	GO Cellular Components	GO:0000502	proteasome complex	-5.80901	-4.17376	12/64	5685,5689,5690,5695,5706,5707,5708,5709,5713,5719,7415,11047	PSMA4,PSMB1,PSMB2,PSMB7,PSMC6,PSMD1,PSMD2,PSMD3,PSMD7,PSMD13,VCP,ADRM1
13_Member	GO Biological Processes	GO:2000736	regulation of stem cell differentiation	-5.75296	-4.12016	16/114	25,3192,4054,4851,5685,5689,5690,5695,5706,5707,5708,5709,5713,5719,6774,51441	ABL1,HNRNPU,LTBP3,NOTCH1,PSMA4,PSMB1,PSMB2,PSMB7,PSMC6,PSMD1,PSMD2,PSMD3,PSMD7,PSMD13,STAT3,YTHDF2
13_Member	GO Biological Processes	GO:0062012	regulation of small molecule metabolic process	-5.74628	-4.1151	36/443	33,301,405,1213,1347,1958,2023,3837,4779,4946,5447,5499,5500,5685,5689,5690,5695,5706,5707,5708,5709,5713,5719,5901,6319,6396,6591,6774,7262,7415,10447,22937,27122,55022,55706,93974	ACADL,ANXA1,ARNT,CLTC,COX7A2,EGR1,ENO1,KPNB1,NFE2L1,OAZ1,POR,PPP1CA,PPP1CB,PSMA4,PSMB1,PSMB2,PSMB7,PSMC6,PSMD1,PSMD2,PSMD3,PSMD7,PSMD13,RAN,SCD,SEC13,SNAI2,STAT3,PHLDA2,VCP,FAM3C,SCAP,DKK3,PID1,NDC1,ATP5IF1
13_Member	GO Cellular Components	GO:1905369	endopeptidase complex	-5.73402	-4.10536	12/65	5685,5689,5690,5695,5706,5707,5708,5709,5713,5719,7415,11047	PSMA4,PSMB1,PSMB2,PSMB7,PSMC6,PSMD1,PSMD2,PSMD3,PSMD7,PSMD13,VCP,ADRM1
13_Member	GO Cellular Components	GO:1905368	peptidase complex	-5.64987	-4.03231	14/90	5685,5689,5690,5695,5706,5707,5708,5709,5713,5719,7415,9789,11047,90701	PSMA4,PSMB1,PSMB2,PSMB7,PSMC6,PSMD1,PSMD2,PSMD3,PSMD7,PSMD13,VCP,SPCS2,ADRM1,SEC11C
13_Member	GO Biological Processes	GO:0071356	cellular response to tumor necrosis factor	-5.56612	-3.96098	27/289	81,427,965,1277,3611,4654,5685,5689,5690,5695,5706,5707,5708,5709,5713,5719,8531,8771,10519,10594,10631,27063,54469,55022,58509,60401,84888	ACTN4,ASAH1,CD58,COL1A1,ILK,MYOD1,PSMA4,PSMB1,PSMB2,PSMB7,PSMC6,PSMD1,PSMD2,PSMD3,PSMD7,PSMD13,YBX3,TNFRSF6B,CIB1,PRPF8,POSTN,ANKRD1,ZFAND6,PID1,CACTIN,EDA2R,SPPL2A
13_Member	GO Biological Processes	GO:0033238	regulation of cellular amine metabolic process	-5.38407	-3.80302	13/82	3251,4946,5037,5685,5689,5690,5695,5706,5707,5708,5709,5713,5719	HPRT1,OAZ1,PEBP1,PSMA4,PSMB1,PSMB2,PSMB7,PSMC6,PSMD1,PSMD2,PSMD3,PSMD7,PSMD13
13_Member	GO Biological Processes	GO:1901532	regulation of hematopoietic progenitor cell differentiation	-5.38407	-3.80302	13/82	25,4851,5685,5689,5690,5695,5706,5707,5708,5709,5713,5719,51441	ABL1,NOTCH1,PSMA4,PSMB1,PSMB2,PSMB7,PSMC6,PSMD1,PSMD2,PSMD3,PSMD7,PSMD13,YTHDF2
13_Member	GO Cellular Components	GO:0005838	proteasome regulatory particle	-5.38271	-3.80302	7/21	5706,5707,5708,5709,5713,5719,11047	PSMC6,PSMD1,PSMD2,PSMD3,PSMD7,PSMD13,ADRM1
13_Member	GO Biological Processes	GO:1902036	regulation of hematopoietic stem cell differentiation	-5.38034	-3.80302	12/70	25,5685,5689,5690,5695,5706,5707,5708,5709,5713,5719,51441	ABL1,PSMA4,PSMB1,PSMB2,PSMB7,PSMC6,PSMD1,PSMD2,PSMD3,PSMD7,PSMD13,YTHDF2
13_Member	GO Biological Processes	GO:0006521	regulation of cellular amino acid metabolic process	-5.13045	-3.59325	11/62	4946,5685,5689,5690,5695,5706,5707,5708,5709,5713,5719	OAZ1,PSMA4,PSMB1,PSMB2,PSMB7,PSMC6,PSMD1,PSMD2,PSMD3,PSMD7,PSMD13
13_Member	GO Biological Processes	GO:0090263	positive regulation of canonical Wnt signaling pathway	-5.06934	-3.53928	17/143	1277,1613,2719,3611,3728,5685,5689,5690,5695,5706,5707,5708,5709,5713,5719,7415,79971	COL1A1,DAPK3,GPC3,ILK,JUP,PSMA4,PSMB1,PSMB2,PSMB7,PSMC6,PSMD1,PSMD2,PSMD3,PSMD7,PSMD13,VCP,WLS
13_Member	GO Biological Processes	GO:0070498	interleukin-1-mediated signaling pathway	-5.04701	-3.52016	14/101	1958,5685,5689,5690,5695,5706,5707,5708,5709,5713,5719,6233,8878,54472	EGR1,PSMA4,PSMB1,PSMB2,PSMB7,PSMC6,PSMD1,PSMD2,PSMD3,PSMD7,PSMD13,RPS27A,SQSTM1,TOLLIP
13_Member	GO Cellular Components	GO:0022624	proteasome accessory complex	-4.94808	-3.43322	7/24	5706,5707,5708,5709,5713,5719,11047	PSMC6,PSMD1,PSMD2,PSMD3,PSMD7,PSMD13,ADRM1
13_Member	GO Biological Processes	GO:0060218	hematopoietic stem cell differentiation	-4.82039	-3.32261	12/79	25,5685,5689,5690,5695,5706,5707,5708,5709,5713,5719,51441	ABL1,PSMA4,PSMB1,PSMB2,PSMB7,PSMC6,PSMD1,PSMD2,PSMD3,PSMD7,PSMD13,YTHDF2
13_Member	GO Biological Processes	GO:0045930	negative regulation of mitotic cell cycle	-4.40333	-2.95578	27/335	25,694,1499,1843,2191,3550,4193,5546,5685,5689,5690,5695,5706,5707,5708,5709,5713,5719,6152,6154,7077,7155,7832,10769,23019,23513,57165	ABL1,BTG1,CTNNB1,DUSP1,FAP,IK,MDM2,PRCC,PSMA4,PSMB1,PSMB2,PSMB7,PSMC6,PSMD1,PSMD2,PSMD3,PSMD7,PSMD13,RPL24,RPL26,TIMP2,TOP2B,BTG2,PLK2,CNOT1,SCRIB,GJC2
13_Member	GO Biological Processes	GO:0048863	stem cell differentiation	-4.28277	-2.85321	22/249	25,309,2335,3192,4054,4089,4851,5685,5689,5690,5695,5706,5707,5708,5709,5713,5719,6591,6774,8828,23603,51441	ABL1,ANXA6,FN1,HNRNPU,LTBP3,SMAD4,NOTCH1,PSMA4,PSMB1,PSMB2,PSMB7,PSMC6,PSMD1,PSMD2,PSMD3,PSMD7,PSMD13,SNAI2,STAT3,NRP2,CORO1C,YTHDF2
13_Member	GO Biological Processes	GO:0045786	negative regulation of cell cycle	-4.2367	-2.81399	42/644	25,694,1499,1843,1982,2191,3550,3611,4193,4282,4851,4853,4869,5546,5573,5604,5685,5689,5690,5695,5706,5707,5708,5709,5713,5719,6152,6154,7077,7155,7832,8563,9349,10527,10769,11335,23019,23468,23513,27339,57165,163859	ABL1,BTG1,CTNNB1,DUSP1,EIF4G2,FAP,IK,ILK,MDM2,MIF,NOTCH1,NOTCH2,NPM1,PRCC,PRKAR1A,MAP2K1,PSMA4,PSMB1,PSMB2,PSMB7,PSMC6,PSMD1,PSMD2,PSMD3,PSMD7,PSMD13,RPL24,RPL26,TIMP2,TOP2B,BTG2,THOC5,RPL23,IPO7,PLK2,CBX3,CNOT1,CBX5,SCRIB,PRPF19,GJC2,SDE2
13_Member	GO Biological Processes	GO:0031145	anaphase-promoting complex-dependent catabolic process	-4.00948	-2.6217	11/81	5685,5689,5690,5695,5706,5707,5708,5709,5713,5719,6233	PSMA4,PSMB1,PSMB2,PSMB7,PSMC6,PSMD1,PSMD2,PSMD3,PSMD7,PSMD13,RPS27A
13_Member	GO Biological Processes	GO:0042180	cellular ketone metabolic process	-3.95414	-2.57382	21/244	33,301,1958,2806,2821,3029,4779,4946,5685,5689,5690,5695,5706,5707,5708,5709,5713,5719,22937,27122,84274	ACADL,ANXA1,EGR1,GOT2,GPI,HAGH,NFE2L1,OAZ1,PSMA4,PSMB1,PSMB2,PSMB7,PSMC6,PSMD1,PSMD2,PSMD3,PSMD7,PSMD13,SCAP,DKK3,COQ5
13_Member	GO Biological Processes	GO:0010565	regulation of cellular ketone metabolic process	-3.93945	-2.56256	17/175	33,301,1958,4779,4946,5685,5689,5690,5695,5706,5707,5708,5709,5713,5719,22937,27122	ACADL,ANXA1,EGR1,NFE2L1,OAZ1,PSMA4,PSMB1,PSMB2,PSMB7,PSMC6,PSMD1,PSMD2,PSMD3,PSMD7,PSMD13,SCAP,DKK3
13_Member	GO Biological Processes	GO:0071347	cellular response to interleukin-1	-3.90913	-2.53494	17/176	1051,1958,5685,5689,5690,5695,5706,5707,5708,5709,5713,5719,6233,8878,27063,54472,58509	CEBPB,EGR1,PSMA4,PSMB1,PSMB2,PSMB7,PSMC6,PSMD1,PSMD2,PSMD3,PSMD7,PSMD13,RPS27A,SQSTM1,ANKRD1,TOLLIP,CACTIN
13_Member	GO Biological Processes	GO:0044106	cellular amine metabolic process	-3.8503	-2.48502	14/129	3251,4946,5037,5685,5689,5690,5695,5706,5707,5708,5709,5713,5719,6303	HPRT1,OAZ1,PEBP1,PSMA4,PSMB1,PSMB2,PSMB7,PSMC6,PSMD1,PSMD2,PSMD3,PSMD7,PSMD13,SAT1
13_Member	GO Biological Processes	GO:0070555	response to interleukin-1	-3.74091	-2.39678	18/199	301,1051,1958,5685,5689,5690,5695,5706,5707,5708,5709,5713,5719,6233,8878,27063,54472,58509	ANXA1,CEBPB,EGR1,PSMA4,PSMB1,PSMB2,PSMB7,PSMC6,PSMD1,PSMD2,PSMD3,PSMD7,PSMD13,RPS27A,SQSTM1,ANKRD1,TOLLIP,CACTIN
13_Member	GO Biological Processes	GO:0009308	amine metabolic process	-3.54161	-2.22743	14/138	3251,4946,5037,5685,5689,5690,5695,5706,5707,5708,5709,5713,5719,6303	HPRT1,OAZ1,PEBP1,PSMA4,PSMB1,PSMB2,PSMB7,PSMC6,PSMD1,PSMD2,PSMD3,PSMD7,PSMD13,SAT1
13_Member	GO Biological Processes	GO:0045088	regulation of innate immune response	-3.44823	-2.14451	30/444	101,708,1508,1513,1520,2319,3460,3916,5641,5685,5689,5690,5695,5706,5707,5708,5709,5713,5719,6223,6233,6421,7105,7184,7323,9021,11140,23513,57142,58509	ADAM8,C1QBP,CTSB,CTSK,CTSS,FLOT2,IFNGR2,LAMP1,LGMN,PSMA4,PSMB1,PSMB2,PSMB7,PSMC6,PSMD1,PSMD2,PSMD3,PSMD7,PSMD13,RPS19,RPS27A,SFPQ,TSPAN6,HSP90B1,UBE2D3,SOCS3,CDC37,SCRIB,RTN4,CACTIN
13_Member	GO Biological Processes	GO:0038061	NIK/NF-kappaB signaling	-3.30718	-2.02836	16/180	81,351,3611,5052,5685,5689,5690,5695,5706,5707,5708,5709,5713,5719,7105,51564	ACTN4,APP,ILK,PRDX1,PSMA4,PSMB1,PSMB2,PSMB7,PSMC6,PSMD1,PSMD2,PSMD3,PSMD7,PSMD13,TSPAN6,HDAC7
13_Member	GO Biological Processes	GO:0033209	tumor necrosis factor-mediated signaling pathway	-3.18367	-1.92325	15/167	81,3611,5685,5689,5690,5695,5706,5707,5708,5709,5713,5719,8771,60401,84888	ACTN4,ILK,PSMA4,PSMB1,PSMB2,PSMB7,PSMC6,PSMD1,PSMD2,PSMD3,PSMD7,PSMD13,TNFRSF6B,EDA2R,SPPL2A
13_Member	GO Biological Processes	GO:0002758	innate immune response-activating signal transduction	-3.15884	-1.90393	22/299	708,1508,1513,1520,2319,5641,5685,5689,5690,5695,5706,5707,5708,5709,5713,5719,6233,7105,7184,7323,57142,58509	C1QBP,CTSB,CTSK,CTSS,FLOT2,LGMN,PSMA4,PSMB1,PSMB2,PSMB7,PSMC6,PSMD1,PSMD2,PSMD3,PSMD7,PSMD13,RPS27A,TSPAN6,HSP90B1,UBE2D3,RTN4,CACTIN
13_Member	GO Biological Processes	GO:0002218	activation of innate immune response	-3.13606	-1.88353	23/320	708,1508,1513,1520,2319,5641,5685,5689,5690,5695,5706,5707,5708,5709,5713,5719,6233,6421,7105,7184,7323,57142,58509	C1QBP,CTSB,CTSK,CTSS,FLOT2,LGMN,PSMA4,PSMB1,PSMB2,PSMB7,PSMC6,PSMD1,PSMD2,PSMD3,PSMD7,PSMD13,RPS27A,SFPQ,TSPAN6,HSP90B1,UBE2D3,RTN4,CACTIN
13_Member	GO Biological Processes	GO:0038095	Fc-epsilon receptor signaling pathway	-3.12998	-1.87988	15/169	2353,2885,3725,5685,5689,5690,5695,5706,5707,5708,5709,5713,5719,5879,6464	FOS,GRB2,JUN,PSMA4,PSMB1,PSMB2,PSMB7,PSMC6,PSMD1,PSMD2,PSMD3,PSMD7,PSMD13,RAC1,SHC1
13_Member	GO Biological Processes	GO:0045089	positive regulation of innate immune response	-3.11353	-1.87109	26/382	101,708,1508,1513,1520,2319,3916,5641,5685,5689,5690,5695,5706,5707,5708,5709,5713,5719,6223,6233,6421,7105,7184,7323,57142,58509	ADAM8,C1QBP,CTSB,CTSK,CTSS,FLOT2,LAMP1,LGMN,PSMA4,PSMB1,PSMB2,PSMB7,PSMC6,PSMD1,PSMD2,PSMD3,PSMD7,PSMD13,RPS19,RPS27A,SFPQ,TSPAN6,HSP90B1,UBE2D3,RTN4,CACTIN
13_Member	GO Biological Processes	GO:0031146	SCF-dependent proteasomal ubiquitin-dependent protein catabolic process	-2.99026	-1.76508	10/90	5685,5689,5690,5695,5706,5707,5708,5709,5713,5719	PSMA4,PSMB1,PSMB2,PSMB7,PSMC6,PSMD1,PSMD2,PSMD3,PSMD7,PSMD13
13_Member	GO Cellular Components	GO:0008541	proteasome regulatory particle, lid subcomplex	-2.89719	-1.69077	3/7	5709,5719,11047	PSMD3,PSMD13,ADRM1
13_Member	GO Biological Processes	GO:0010972	negative regulation of G2/M transition of mitotic cell cycle	-2.88014	-1.67676	10/93	5685,5689,5690,5695,5706,5707,5708,5709,5713,5719	PSMA4,PSMB1,PSMB2,PSMB7,PSMC6,PSMD1,PSMD2,PSMD3,PSMD7,PSMD13
13_Member	GO Biological Processes	GO:0010948	negative regulation of cell cycle process	-2.83047	-1.6373	24/358	1843,3550,4193,4282,4869,5573,5685,5689,5690,5695,5706,5707,5708,5709,5713,5719,6154,7832,9349,10769,11335,23019,23468,57165	DUSP1,IK,MDM2,MIF,NPM1,PRKAR1A,PSMA4,PSMB1,PSMB2,PSMB7,PSMC6,PSMD1,PSMD2,PSMD3,PSMD7,PSMD13,RPL26,BTG2,RPL23,PLK2,CBX3,CNOT1,CBX5,GJC2
13_Member	GO Biological Processes	GO:0016579	protein deubiquitination	-2.7162	-1.53847	20/283	60,4089,4193,5685,5689,5690,5695,5706,5707,5708,5709,5713,5719,6233,7415,8078,9146,10869,11047,55793	ACTB,SMAD4,MDM2,PSMA4,PSMB1,PSMB2,PSMB7,PSMC6,PSMD1,PSMD2,PSMD3,PSMD7,PSMD13,RPS27A,VCP,USP5,HGS,USP19,ADRM1,MINDY1
13_Member	GO Biological Processes	GO:1901991	negative regulation of mitotic cell cycle phase transition	-2.66306	-1.49997	18/246	1843,3550,4193,5685,5689,5690,5695,5706,5707,5708,5709,5713,5719,6154,7832,10769,23019,57165	DUSP1,IK,MDM2,PSMA4,PSMB1,PSMB2,PSMB7,PSMC6,PSMD1,PSMD2,PSMD3,PSMD7,PSMD13,RPL26,BTG2,PLK2,CNOT1,GJC2
13_Member	GO Biological Processes	GO:1902750	negative regulation of cell cycle G2/M phase transition	-2.4862	-1.3539	10/105	5685,5689,5690,5695,5706,5707,5708,5709,5713,5719	PSMA4,PSMB1,PSMB2,PSMB7,PSMC6,PSMD1,PSMD2,PSMD3,PSMD7,PSMD13
13_Member	GO Biological Processes	GO:0070646	protein modification by small protein removal	-2.44248	-1.31803	20/299	60,4089,4193,5685,5689,5690,5695,5706,5707,5708,5709,5713,5719,6233,7415,8078,9146,10869,11047,55793	ACTB,SMAD4,MDM2,PSMA4,PSMB1,PSMB2,PSMB7,PSMC6,PSMD1,PSMD2,PSMD3,PSMD7,PSMD13,RPS27A,VCP,USP5,HGS,USP19,ADRM1,MINDY1
13_Member	GO Biological Processes	GO:0002244	hematopoietic progenitor cell differentiation	-2.40449	-1.28607	13/162	25,4851,5685,5689,5690,5695,5706,5707,5708,5709,5713,5719,51441	ABL1,NOTCH1,PSMA4,PSMB1,PSMB2,PSMB7,PSMC6,PSMD1,PSMD2,PSMD3,PSMD7,PSMD13,YTHDF2
13_Member	GO Cellular Components	GO:0005839	proteasome core complex	-2.36806	-1.26171	4/20	5685,5689,5690,5695	PSMA4,PSMB1,PSMB2,PSMB7
13_Member	GO Biological Processes	GO:1901988	negative regulation of cell cycle phase transition	-2.32134	-1.22246	18/265	1843,3550,4193,5685,5689,5690,5695,5706,5707,5708,5709,5713,5719,6154,7832,10769,23019,57165	DUSP1,IK,MDM2,PSMA4,PSMB1,PSMB2,PSMB7,PSMC6,PSMD1,PSMD2,PSMD3,PSMD7,PSMD13,RPL26,BTG2,PLK2,CNOT1,GJC2
13_Member	GO Molecular Functions	GO:0004298	threonine-type endopeptidase activity	-2.28807	-1.19489	4/21	5685,5689,5690,5695	PSMA4,PSMB1,PSMB2,PSMB7
13_Member	GO Molecular Functions	GO:0070003	threonine-type peptidase activity	-2.28807	-1.19489	4/21	5685,5689,5690,5695	PSMA4,PSMB1,PSMB2,PSMB7
13_Member	GO Biological Processes	GO:0000209	protein polyubiquitination	-2.28482	-1.19422	20/309	642,1499,4779,5685,5689,5690,5695,5706,5707,5708,5709,5713,5719,6233,7323,7332,23295,26118,27339,57154	BLMH,CTNNB1,NFE2L1,PSMA4,PSMB1,PSMB2,PSMB7,PSMC6,PSMD1,PSMD2,PSMD3,PSMD7,PSMD13,RPS27A,UBE2D3,UBE2L3,MGRN1,WSB1,PRPF19,SMURF1
13_Member	GO Cellular Components	GO:0019774	proteasome core complex, beta-subunit complex	-2.26843	-1.18549	3/11	5689,5690,5695	PSMB1,PSMB2,PSMB7
13_Member	GO Biological Processes	GO:0002223	stimulatory C-type lectin receptor signaling pathway	-2.25878	-1.1763	10/113	5685,5689,5690,5695,5706,5707,5708,5709,5713,5719	PSMA4,PSMB1,PSMB2,PSMB7,PSMC6,PSMD1,PSMD2,PSMD3,PSMD7,PSMD13
13_Member	GO Biological Processes	GO:0002220	innate immune response activating cell surface receptor signaling pathway	-2.17971	-1.11192	10/116	5685,5689,5690,5695,5706,5707,5708,5709,5713,5719	PSMA4,PSMB1,PSMB2,PSMB7,PSMC6,PSMD1,PSMD2,PSMD3,PSMD7,PSMD13
13_Member	GO Biological Processes	GO:0010499	proteasomal ubiquitin-independent protein catabolic process	-2.14148	-1.08227	4/23	5685,5689,5690,5695	PSMA4,PSMB1,PSMB2,PSMB7
14_Summary	GO Biological Processes	GO:0009611	response to wounding	-16.8456	-14.4111	72/677	60,71,301,302,308,309,378,708,830,832,960,977,998,1277,1278,1465,1490,1495,1634,1809,2191,2247,2335,2782,2934,3065,3066,3162,3371,3475,3611,3725,3913,3998,4035,4192,4627,4628,4654,4814,4851,5037,5055,5270,5339,5573,5604,5879,6198,6382,6385,6431,6678,7043,7414,7975,8573,10362,10630,10631,10855,11057,11331,23468,23499,23513,29956,30845,79567,90102,118812,136319,2821,2771,2806,3099,5066,7422,8766,37…	ACTB,ACTG1,ANXA1,ANXA2,ANXA5,ANXA6,ARF4,C1QBP,CAPZA2,CAPZB,CD44,CD151,CDC42,COL1A1,COL1A2,CSRP1,CCN2,CTNNA1,DCN,DPYSL3,FAP,FGF2,FN1,GNB1,GSN,HDAC1,HDAC2,HMOX1,TNC,IFRD1,ILK,JUN,LAMB2,LMAN1,LRP1,MDK,MYH9,MYH10,MYOD1,NINJ1,NOTCH1,PEBP1,SERPINB2,SERPINE2,PLEC,PRKAR1A,MAP2K1,RAC1,RPS6KB1,SDC1,SDC4,SRSF6,SPARC,TGFB3,VCL,MAFK,CASK,HMG20B,PDPN,POSTN,HPSE,ABHD2,PHB2,CBX5,MACF1,SCRIB,CERS2,EHD3,RIPOR1,PHL…
14_Member	GO Biological Processes	GO:0009611	response to wounding	-16.8456	-14.4111	72/677	60,71,301,302,308,309,378,708,830,832,960,977,998,1277,1278,1465,1490,1495,1634,1809,2191,2247,2335,2782,2934,3065,3066,3162,3371,3475,3611,3725,3913,3998,4035,4192,4627,4628,4654,4814,4851,5037,5055,5270,5339,5573,5604,5879,6198,6382,6385,6431,6678,7043,7414,7975,8573,10362,10630,10631,10855,11057,11331,23468,23499,23513,29956,30845,79567,90102,118812,136319	ACTB,ACTG1,ANXA1,ANXA2,ANXA5,ANXA6,ARF4,C1QBP,CAPZA2,CAPZB,CD44,CD151,CDC42,COL1A1,COL1A2,CSRP1,CCN2,CTNNA1,DCN,DPYSL3,FAP,FGF2,FN1,GNB1,GSN,HDAC1,HDAC2,HMOX1,TNC,IFRD1,ILK,JUN,LAMB2,LMAN1,LRP1,MDK,MYH9,MYH10,MYOD1,NINJ1,NOTCH1,PEBP1,SERPINB2,SERPINE2,PLEC,PRKAR1A,MAP2K1,RAC1,RPS6KB1,SDC1,SDC4,SRSF6,SPARC,TGFB3,VCL,MAFK,CASK,HMG20B,PDPN,POSTN,HPSE,ABHD2,PHB2,CBX5,MACF1,SCRIB,CERS2,EHD3,RIPOR1,PHL…
14_Member	GO Biological Processes	GO:0042060	wound healing	-12.1384	-9.93202	56/558	60,71,301,302,308,309,708,830,832,960,977,998,1277,1278,1465,1634,2191,2247,2335,2782,2934,3065,3066,3162,3371,3475,3611,3998,4627,4628,4654,4814,4851,5055,5270,5339,5573,5879,6382,6385,6431,6678,7043,7414,7975,8573,10362,10630,10631,10855,23468,23499,23513,30845,90102,136319	ACTB,ACTG1,ANXA1,ANXA2,ANXA5,ANXA6,C1QBP,CAPZA2,CAPZB,CD44,CD151,CDC42,COL1A1,COL1A2,CSRP1,DCN,FAP,FGF2,FN1,GNB1,GSN,HDAC1,HDAC2,HMOX1,TNC,IFRD1,ILK,LMAN1,MYH9,MYH10,MYOD1,NINJ1,NOTCH1,SERPINB2,SERPINE2,PLEC,PRKAR1A,RAC1,SDC1,SDC4,SRSF6,SPARC,TGFB3,VCL,MAFK,CASK,HMG20B,PDPN,POSTN,HPSE,CBX5,MACF1,SCRIB,EHD3,PHLDB2,MTPN
14_Member	GO Biological Processes	GO:0007599	hemostasis	-5.54887	-3.94603	30/342	60,71,302,308,708,830,832,998,1277,1278,1465,2191,2782,2821,3065,3066,3611,3998,4627,5055,5270,5573,5879,7414,7975,10362,10630,10855,23468,30845	ACTB,ACTG1,ANXA2,ANXA5,C1QBP,CAPZA2,CAPZB,CDC42,COL1A1,COL1A2,CSRP1,FAP,GNB1,GPI,HDAC1,HDAC2,ILK,LMAN1,MYH9,SERPINB2,SERPINE2,PRKAR1A,RAC1,VCL,MAFK,HMG20B,PDPN,HPSE,CBX5,EHD3
14_Member	GO Biological Processes	GO:0007596	blood coagulation	-5.22279	-3.66753	29/337	60,71,302,308,708,830,832,998,1277,1278,1465,2191,2782,3065,3066,3611,3998,4627,5055,5270,5573,5879,7414,7975,10362,10630,10855,23468,30845	ACTB,ACTG1,ANXA2,ANXA5,C1QBP,CAPZA2,CAPZB,CDC42,COL1A1,COL1A2,CSRP1,FAP,GNB1,HDAC1,HDAC2,ILK,LMAN1,MYH9,SERPINB2,SERPINE2,PRKAR1A,RAC1,VCL,MAFK,HMG20B,PDPN,HPSE,CBX5,EHD3
14_Member	GO Biological Processes	GO:0050817	coagulation	-5.07525	-3.54359	29/343	60,71,302,308,708,830,832,998,1277,1278,1465,2191,2782,3065,3066,3611,3998,4627,5055,5270,5573,5879,7414,7975,10362,10630,10855,23468,30845	ACTB,ACTG1,ANXA2,ANXA5,C1QBP,CAPZA2,CAPZB,CDC42,COL1A1,COL1A2,CSRP1,FAP,GNB1,HDAC1,HDAC2,ILK,LMAN1,MYH9,SERPINB2,SERPINE2,PRKAR1A,RAC1,VCL,MAFK,HMG20B,PDPN,HPSE,CBX5,EHD3
14_Member	GO Biological Processes	GO:0050878	regulation of body fluid levels	-4.54779	-3.0856	36/502	60,71,302,308,708,830,832,998,1277,1278,1465,2191,2771,2782,2806,2821,3065,3066,3099,3611,3998,4627,5055,5066,5270,5573,5879,7414,7422,7975,8766,10362,10630,10855,23468,30845	ACTB,ACTG1,ANXA2,ANXA5,C1QBP,CAPZA2,CAPZB,CDC42,COL1A1,COL1A2,CSRP1,FAP,GNAI2,GNB1,GOT2,GPI,HDAC1,HDAC2,HK2,ILK,LMAN1,MYH9,SERPINB2,PAM,SERPINE2,PRKAR1A,RAC1,VCL,VEGFA,MAFK,RAB11A,HMG20B,PDPN,HPSE,CBX5,EHD3
14_Member	GO Biological Processes	GO:0034109	homotypic cell-cell adhesion	-3.48824	-2.18106	10/78	60,71,1465,3611,3728,4627,5270,5962,7414,10630	ACTB,ACTG1,CSRP1,ILK,JUP,MYH9,SERPINE2,RDX,VCL,PDPN
14_Member	GO Biological Processes	GO:0070527	platelet aggregation	-3.06005	-1.82486	8/59	60,71,1465,3611,4627,5270,7414,10630	ACTB,ACTG1,CSRP1,ILK,MYH9,SERPINE2,VCL,PDPN
15_Summary	KEGG Pathway	hsa04510	Focal adhesion	-16.4639	-14.0497	37/199	60,71,81,998,1277,1278,1284,1291,1292,1293,1499,2335,2885,2889,3371,3611,3655,3685,3688,3693,3725,3912,3913,3915,5499,5500,5604,5879,6093,6464,7058,7414,7422,7791,8516,9475,9564,960,3339,6382,6385,25,405,868,1487,1495,1613,1855,2247,2353,2771,2782,2788,3065,3066,3320,3728,4089,4193,5914,6513,6774,7043,7184,8322,9826,10342,10928,54205,468,1978,4170,6198,7529,7531,10971,11140,90993	ACTB,ACTG1,ACTN4,CDC42,COL1A1,COL1A2,COL4A2,COL6A1,COL6A2,COL6A3,CTNNB1,FN1,GRB2,RAPGEF1,TNC,ILK,ITGA6,ITGAV,ITGB1,ITGB5,JUN,LAMB1,LAMB2,LAMC1,PPP1CA,PPP1CB,MAP2K1,RAC1,ROCK1,SHC1,THBS2,VCL,VEGFA,ZYX,ITGA8,ROCK2,BCAR1,CD44,HSPG2,SDC1,SDC4,ABL1,ARNT,CBLB,CTBP1,CTNNA1,DAPK3,DVL1,FGF2,FOS,GNAI2,GNB1,GNG7,HDAC1,HDAC2,HSP90AA1,JUP,SMAD4,MDM2,RARA,SLC2A1,STAT3,TGFB3,HSP90B1,FZD4,ARHGEF11,TFG,RALBP1,CYC…
15_Member	KEGG Pathway	hsa04510	Focal adhesion	-16.4639	-14.0497	37/199	60,71,81,998,1277,1278,1284,1291,1292,1293,1499,2335,2885,2889,3371,3611,3655,3685,3688,3693,3725,3912,3913,3915,5499,5500,5604,5879,6093,6464,7058,7414,7422,7791,8516,9475,9564	ACTB,ACTG1,ACTN4,CDC42,COL1A1,COL1A2,COL4A2,COL6A1,COL6A2,COL6A3,CTNNB1,FN1,GRB2,RAPGEF1,TNC,ILK,ITGA6,ITGAV,ITGB1,ITGB5,JUN,LAMB1,LAMB2,LAMC1,PPP1CA,PPP1CB,MAP2K1,RAC1,ROCK1,SHC1,THBS2,VCL,VEGFA,ZYX,ITGA8,ROCK2,BCAR1
15_Member	KEGG Pathway	hsa04512	ECM-receptor interaction	-12.4661	-10.2377	21/82	960,1277,1278,1284,1291,1292,1293,2335,3339,3371,3655,3685,3688,3693,3912,3913,3915,6382,6385,7058,8516	CD44,COL1A1,COL1A2,COL4A2,COL6A1,COL6A2,COL6A3,FN1,HSPG2,TNC,ITGA6,ITGAV,ITGB1,ITGB5,LAMB1,LAMB2,LAMC1,SDC1,SDC4,THBS2,ITGA8
15_Member	KEGG Pathway	hsa05200	Pathways in cancer	-11.7226	-9.54842	45/395	25,405,868,998,1284,1487,1495,1499,1613,1855,2247,2335,2353,2771,2782,2788,2885,3065,3066,3320,3655,3685,3688,3725,3728,3912,3913,3915,4089,4193,5604,5879,5914,6093,6513,6774,7043,7184,7422,8322,9475,9826,10342,10928,54205	ABL1,ARNT,CBLB,CDC42,COL4A2,CTBP1,CTNNA1,CTNNB1,DAPK3,DVL1,FGF2,FN1,FOS,GNAI2,GNB1,GNG7,GRB2,HDAC1,HDAC2,HSP90AA1,ITGA6,ITGAV,ITGB1,JUN,JUP,LAMB1,LAMB2,LAMC1,SMAD4,MDM2,MAP2K1,RAC1,RARA,ROCK1,SLC2A1,STAT3,TGFB3,HSP90B1,VEGFA,FZD4,ROCK2,ARHGEF11,TFG,RALBP1,CYCS
15_Member	KEGG Pathway	hsa04151	PI3K-Akt signaling pathway	-8.55903	-6.63965	36/342	468,1277,1278,1284,1291,1292,1293,1978,2247,2335,2782,2788,2885,3320,3371,3655,3685,3688,3693,3912,3913,3915,4170,4193,5604,5879,6198,7058,7184,7422,7529,7531,8516,10971,11140,90993	ATF4,COL1A1,COL1A2,COL4A2,COL6A1,COL6A2,COL6A3,EIF4EBP1,FGF2,FN1,GNB1,GNG7,GRB2,HSP90AA1,TNC,ITGA6,ITGAV,ITGB1,ITGB5,LAMB1,LAMB2,LAMC1,MCL1,MDM2,MAP2K1,RAC1,RPS6KB1,THBS2,HSP90B1,VEGFA,YWHAB,YWHAE,ITGA8,YWHAQ,CDC37,CREB3L1
16_Summary	KEGG Pathway	hsa05205	Proteoglycans in cancer	-16.168	-13.7587	37/203	60,71,868,960,998,1499,1634,1655,2017,2247,2335,2719,2885,3339,3685,3688,3693,4060,4193,4478,5499,5500,5604,5879,5962,6093,6198,6382,6383,6385,6774,7078,7422,8322,8826,9475,10855,81,1073,2934,3655,4627,4628,5217,7414,8394,8516,9564,10092,10093,10109,10552,28964,55740,1495,1500,2771,4267,7070,3308,3725,7277,8531,10096,10097,23513,79778,4089,6591,805,2889	ACTB,ACTG1,CBLB,CD44,CDC42,CTNNB1,DCN,DDX5,CTTN,FGF2,FN1,GPC3,GRB2,HSPG2,ITGAV,ITGB1,ITGB5,LUM,MDM2,MSN,PPP1CA,PPP1CB,MAP2K1,RAC1,RDX,ROCK1,RPS6KB1,SDC1,SDC2,SDC4,STAT3,TIMP3,VEGFA,FZD4,IQGAP1,ROCK2,HPSE,ACTN4,CFL2,GSN,ITGA6,MYH9,MYH10,PFN2,VCL,PIP5K1A,ITGA8,BCAR1,ARPC5,ARPC4,ARPC2,ARPC1A,GIT1,ENAH,CTNNA1,CTNND1,GNAI2,CD99,THY1,HSPA4,JUN,TUBA4A,YBX3,ACTR3,ACTR2,SCRIB,MICALL2,SMAD4,SNAI2,CALM2,RAP…
16_Member	KEGG Pathway	hsa05205	Proteoglycans in cancer	-16.168	-13.7587	37/203	60,71,868,960,998,1499,1634,1655,2017,2247,2335,2719,2885,3339,3685,3688,3693,4060,4193,4478,5499,5500,5604,5879,5962,6093,6198,6382,6383,6385,6774,7078,7422,8322,8826,9475,10855	ACTB,ACTG1,CBLB,CD44,CDC42,CTNNB1,DCN,DDX5,CTTN,FGF2,FN1,GPC3,GRB2,HSPG2,ITGAV,ITGB1,ITGB5,LUM,MDM2,MSN,PPP1CA,PPP1CB,MAP2K1,RAC1,RDX,ROCK1,RPS6KB1,SDC1,SDC2,SDC4,STAT3,TIMP3,VEGFA,FZD4,IQGAP1,ROCK2,HPSE
16_Member	KEGG Pathway	hsa04810	Regulation of actin cytoskeleton	-13.2003	-10.9135	34/212	60,71,81,998,1073,2247,2335,2934,3655,3685,3688,3693,4478,4627,4628,5217,5499,5500,5604,5879,5962,6093,7414,8394,8516,8826,9475,9564,10092,10093,10109,10552,28964,55740	ACTB,ACTG1,ACTN4,CDC42,CFL2,FGF2,FN1,GSN,ITGA6,ITGAV,ITGB1,ITGB5,MSN,MYH9,MYH10,PFN2,PPP1CA,PPP1CB,MAP2K1,RAC1,RDX,ROCK1,VCL,PIP5K1A,ITGA8,IQGAP1,ROCK2,BCAR1,ARPC5,ARPC4,ARPC2,ARPC1A,GIT1,ENAH
16_Member	KEGG Pathway	hsa04670	Leukocyte transendothelial migration	-6.45552	-4.73228	17/114	60,71,81,998,1495,1499,1500,2771,3688,4267,4478,5879,6093,7070,7414,9475,9564	ACTB,ACTG1,ACTN4,CDC42,CTNNA1,CTNNB1,CTNND1,GNAI2,ITGB1,CD99,MSN,RAC1,ROCK1,THY1,VCL,ROCK2,BCAR1
16_Member	KEGG Pathway	hsa04530	Tight junction	-6.39217	-4.6749	21/170	60,71,81,998,2017,3308,3688,3725,4478,4627,4628,5879,5962,6093,7277,8531,9475,10096,10097,23513,79778	ACTB,ACTG1,ACTN4,CDC42,CTTN,HSPA4,ITGB1,JUN,MSN,MYH9,MYH10,RAC1,RDX,ROCK1,TUBA4A,YBX3,ROCK2,ACTR3,ACTR2,SCRIB,MICALL2
16_Member	KEGG Pathway	hsa04520	Adherens junction	-5.248	-3.69137	12/72	60,71,81,998,1495,1499,1500,4089,5879,6591,7414,8826	ACTB,ACTG1,ACTN4,CDC42,CTNNA1,CTNNB1,CTNND1,SMAD4,RAC1,SNAI2,VCL,IQGAP1
16_Member	KEGG Pathway	hsa04015	Rap1 signaling pathway	-2.21643	-1.13968	15/210	60,71,805,998,1499,1500,2247,2771,2889,3688,5217,5604,5879,7422,9564	ACTB,ACTG1,CALM2,CDC42,CTNNB1,CTNND1,FGF2,GNAI2,RAPGEF1,ITGB1,PFN2,MAP2K1,RAC1,VEGFA,BCAR1
17_Summary	GO Biological Processes	GO:0007169	transmembrane receptor protein tyrosine kinase signaling pathway	-15.9464	-13.5467	73/720	25,60,71,163,351,378,405,526,527,868,998,1012,1173,1277,1284,1490,1499,1634,1978,2247,2771,2885,2889,3092,3320,3485,3685,4035,4641,4670,5434,5641,5786,5879,6093,6198,6383,6386,6464,6599,6774,7072,7422,7879,8322,8826,8828,8879,8992,9021,9114,9146,9475,9564,9961,10092,10093,10096,10097,10109,10552,10628,11140,25976,27020,28964,51552,55022,57142,58533,64855,84159,90993,308,468,1051,1278,1290,1291,14…	ABL1,ACTB,ACTG1,AP2B1,APP,ARF4,ARNT,ATP6V1B2,ATP6V0C,CBLB,CDC42,CDH13,AP2M1,COL1A1,COL4A2,CCN2,CTNNB1,DCN,EIF4EBP1,FGF2,GNAI2,GRB2,RAPGEF1,HIP1,HSP90AA1,IGFBP2,ITGAV,LRP1,MYO1C,HNRNPM,POLR2E,LGMN,PTPRA,RAC1,ROCK1,RPS6KB1,SDC2,SDCBP,SHC1,SMARCC1,STAT3,TIA1,VEGFA,RAB7A,FZD4,IQGAP1,NRP2,SGPL1,ATP6V0E1,SOCS3,ATP6V0D1,HGS,ROCK2,BCAR1,MVP,ARPC5,ARPC4,ACTR3,ACTR2,ARPC2,ARPC1A,TXNIP,CDC37,TIPARP,NPTN,GIT…
17_Member	GO Biological Processes	GO:0007169	transmembrane receptor protein tyrosine kinase signaling pathway	-15.9464	-13.5467	73/720	25,60,71,163,351,378,405,526,527,868,998,1012,1173,1277,1284,1490,1499,1634,1978,2247,2771,2885,2889,3092,3320,3485,3685,4035,4641,4670,5434,5641,5786,5879,6093,6198,6383,6386,6464,6599,6774,7072,7422,7879,8322,8826,8828,8879,8992,9021,9114,9146,9475,9564,9961,10092,10093,10096,10097,10109,10552,10628,11140,25976,27020,28964,51552,55022,57142,58533,64855,84159,90993	ABL1,ACTB,ACTG1,AP2B1,APP,ARF4,ARNT,ATP6V1B2,ATP6V0C,CBLB,CDC42,CDH13,AP2M1,COL1A1,COL4A2,CCN2,CTNNB1,DCN,EIF4EBP1,FGF2,GNAI2,GRB2,RAPGEF1,HIP1,HSP90AA1,IGFBP2,ITGAV,LRP1,MYO1C,HNRNPM,POLR2E,LGMN,PTPRA,RAC1,ROCK1,RPS6KB1,SDC2,SDCBP,SHC1,SMARCC1,STAT3,TIA1,VEGFA,RAB7A,FZD4,IQGAP1,NRP2,SGPL1,ATP6V0E1,SOCS3,ATP6V0D1,HGS,ROCK2,BCAR1,MVP,ARPC5,ARPC4,ACTR3,ACTR2,ARPC2,ARPC1A,TXNIP,CDC37,TIPARP,NPTN,GIT…
17_Member	GO Biological Processes	GO:0071417	cellular response to organonitrogen compound	-9.58696	-7.56869	52/577	25,60,308,351,468,526,527,1051,1277,1278,1290,1291,1495,1499,1958,1978,2058,2200,2771,2782,2885,2889,3066,3728,4035,4141,4193,4641,5447,5573,5641,5786,6093,6198,6430,6464,6599,6774,7184,7431,8992,9021,9114,9349,9475,9564,10097,10890,23367,23677,55022,58533	ABL1,ACTB,ANXA5,APP,ATF4,ATP6V1B2,ATP6V0C,CEBPB,COL1A1,COL1A2,COL5A2,COL6A1,CTNNA1,CTNNB1,EGR1,EIF4EBP1,EPRS,FBN1,GNAI2,GNB1,GRB2,RAPGEF1,HDAC2,JUP,LRP1,MARS,MDM2,MYO1C,POR,PRKAR1A,LGMN,PTPRA,ROCK1,RPS6KB1,SRSF5,SHC1,SMARCC1,STAT3,HSP90B1,VIM,ATP6V0E1,SOCS3,ATP6V0D1,RPL23,ROCK2,BCAR1,ACTR2,RAB10,LARP1,SH3BP4,PID1,SNX6
17_Member	GO Biological Processes	GO:1901652	response to peptide	-9.57817	-7.56188	48/508	301,308,351,526,527,682,1277,1490,1958,1978,2058,2200,2771,2806,2885,3030,3033,4035,4141,4193,4641,4851,5447,5573,5641,5786,6093,6198,6430,6431,6464,6513,6599,6678,6774,7431,7832,8826,8992,9021,9114,9349,9475,9564,10890,22937,55022,58533	ANXA1,ANXA5,APP,ATP6V1B2,ATP6V0C,BSG,COL1A1,CCN2,EGR1,EIF4EBP1,EPRS,FBN1,GNAI2,GOT2,GRB2,HADHA,HADH,LRP1,MARS,MDM2,MYO1C,NOTCH1,POR,PRKAR1A,LGMN,PTPRA,ROCK1,RPS6KB1,SRSF5,SRSF6,SHC1,SLC2A1,SMARCC1,SPARC,STAT3,VIM,BTG2,IQGAP1,ATP6V0E1,SOCS3,ATP6V0D1,RPL23,ROCK2,BCAR1,RAB10,SCAP,PID1,SNX6
17_Member	GO Biological Processes	GO:1901699	cellular response to nitrogen compound	-8.9686	-7.01472	54/637	25,60,308,351,468,526,527,1051,1277,1278,1290,1291,1495,1499,1958,1978,2058,2200,2771,2782,2885,2889,3066,3728,4035,4141,4193,4641,4869,5447,5573,5641,5786,6093,6198,6430,6464,6599,6774,6778,7184,7431,8992,9021,9114,9349,9475,9564,10097,10890,23367,23677,55022,58533	ABL1,ACTB,ANXA5,APP,ATF4,ATP6V1B2,ATP6V0C,CEBPB,COL1A1,COL1A2,COL5A2,COL6A1,CTNNA1,CTNNB1,EGR1,EIF4EBP1,EPRS,FBN1,GNAI2,GNB1,GRB2,RAPGEF1,HDAC2,JUP,LRP1,MARS,MDM2,MYO1C,NPM1,POR,PRKAR1A,LGMN,PTPRA,ROCK1,RPS6KB1,SRSF5,SHC1,SMARCC1,STAT3,STAT6,HSP90B1,VIM,ATP6V0E1,SOCS3,ATP6V0D1,RPL23,ROCK2,BCAR1,ACTR2,RAB10,LARP1,SH3BP4,PID1,SNX6
17_Member	GO Biological Processes	GO:0043434	response to peptide hormone	-8.46957	-6.55801	41/427	301,308,526,527,682,1277,1490,1958,1978,2058,2200,2771,2806,2885,3030,3033,4141,4193,4641,5447,5573,5786,6093,6198,6430,6431,6464,6513,6599,6678,6774,7832,8826,8992,9021,9114,9475,9564,10890,22937,55022	ANXA1,ANXA5,ATP6V1B2,ATP6V0C,BSG,COL1A1,CCN2,EGR1,EIF4EBP1,EPRS,FBN1,GNAI2,GOT2,GRB2,HADHA,HADH,MARS,MDM2,MYO1C,POR,PRKAR1A,PTPRA,ROCK1,RPS6KB1,SRSF5,SRSF6,SHC1,SLC2A1,SMARCC1,SPARC,STAT3,BTG2,IQGAP1,ATP6V0E1,SOCS3,ATP6V0D1,ROCK2,BCAR1,RAB10,SCAP,PID1
17_Member	GO Biological Processes	GO:0032870	cellular response to hormone stimulus	-8.4568	-6.54679	56/696	301,308,476,526,527,1499,1508,1512,1520,1655,1843,1978,2058,2200,2353,2771,2782,2885,3065,3192,3371,3485,3490,3725,4141,4193,4478,4641,4654,4851,5447,5573,5786,5901,5914,5962,6093,6198,6430,6464,6586,6597,6599,6774,7332,8896,8992,9021,9114,9475,9564,10890,11057,11331,23019,55022	ANXA1,ANXA5,ATP1A1,ATP6V1B2,ATP6V0C,CTNNB1,CTSB,CTSH,CTSS,DDX5,DUSP1,EIF4EBP1,EPRS,FBN1,FOS,GNAI2,GNB1,GRB2,HDAC1,HNRNPU,TNC,IGFBP2,IGFBP7,JUN,MARS,MDM2,MSN,MYO1C,MYOD1,NOTCH1,POR,PRKAR1A,PTPRA,RAN,RARA,RDX,ROCK1,RPS6KB1,SRSF5,SHC1,SLIT3,SMARCA4,SMARCC1,STAT3,UBE2L3,BUD31,ATP6V0E1,SOCS3,ATP6V0D1,ROCK2,BCAR1,RAB10,ABHD2,PHB2,CNOT1,PID1
17_Member	GO Biological Processes	GO:1901653	cellular response to peptide	-5.91856	-4.264	33/381	308,351,526,527,1978,2058,2200,2771,2885,4035,4141,4193,4641,5447,5573,5641,5786,6093,6198,6430,6464,6599,6774,7431,8992,9021,9114,9349,9475,9564,10890,55022,58533	ANXA5,APP,ATP6V1B2,ATP6V0C,EIF4EBP1,EPRS,FBN1,GNAI2,GRB2,LRP1,MARS,MDM2,MYO1C,POR,PRKAR1A,LGMN,PTPRA,ROCK1,RPS6KB1,SRSF5,SHC1,SMARCC1,STAT3,VIM,ATP6V0E1,SOCS3,ATP6V0D1,RPL23,ROCK2,BCAR1,RAB10,PID1,SNX6
17_Member	GO Biological Processes	GO:0032868	response to insulin	-5.6253	-4.00931	26/270	526,527,1958,1978,2058,2771,2806,2885,3030,3033,4141,4641,5786,6198,6430,6431,6464,6513,6599,8992,9021,9114,9564,10890,22937,55022	ATP6V1B2,ATP6V0C,EGR1,EIF4EBP1,EPRS,GNAI2,GOT2,GRB2,HADHA,HADH,MARS,MYO1C,PTPRA,RPS6KB1,SRSF5,SRSF6,SHC1,SLC2A1,SMARCC1,ATP6V0E1,SOCS3,ATP6V0D1,BCAR1,RAB10,SCAP,PID1
17_Member	GO Biological Processes	GO:0071375	cellular response to peptide hormone stimulus	-4.85028	-3.34829	27/316	308,526,527,1978,2058,2200,2771,2885,4141,4193,4641,5447,5573,5786,6093,6198,6430,6464,6599,6774,8992,9021,9114,9475,9564,10890,55022	ANXA5,ATP6V1B2,ATP6V0C,EIF4EBP1,EPRS,FBN1,GNAI2,GRB2,MARS,MDM2,MYO1C,POR,PRKAR1A,PTPRA,ROCK1,RPS6KB1,SRSF5,SHC1,SMARCC1,STAT3,ATP6V0E1,SOCS3,ATP6V0D1,ROCK2,BCAR1,RAB10,PID1
17_Member	GO Biological Processes	GO:0032869	cellular response to insulin stimulus	-3.80946	-2.45247	19/214	526,527,1978,2058,2771,2885,4141,4641,5786,6198,6430,6464,6599,8992,9021,9114,9564,10890,55022	ATP6V1B2,ATP6V0C,EIF4EBP1,EPRS,GNAI2,GRB2,MARS,MYO1C,PTPRA,RPS6KB1,SRSF5,SHC1,SMARCC1,ATP6V0E1,SOCS3,ATP6V0D1,BCAR1,RAB10,PID1
17_Member	GO Biological Processes	GO:0008286	insulin receptor signaling pathway	-3.47701	-2.17099	14/140	526,527,1978,2771,2885,5786,6198,6464,6599,8992,9021,9114,9564,55022	ATP6V1B2,ATP6V0C,EIF4EBP1,GNAI2,GRB2,PTPRA,RPS6KB1,SHC1,SMARCC1,ATP6V0E1,SOCS3,ATP6V0D1,BCAR1,PID1
18_Summary	GO Molecular Functions	GO:0019904	protein domain specific binding	-15.4282	-13.0473	71/703	25,92,351,392,400,468,476,805,822,868,998,1213,1487,1499,1611,1613,1642,1655,1809,2037,2335,2885,2889,2990,3065,3312,3320,3611,3725,3837,3916,3920,4170,4193,4627,4670,4779,4926,5007,5573,5914,5962,6198,6383,6451,6651,6731,6767,7150,7415,7431,7529,7531,7975,8322,8826,8878,9146,9444,9564,10971,11335,23019,23647,28988,54602,55740,80762,164684,203068,285590	ABL1,ACVR2A,APP,ARHGAP1,ARL1,ATF4,ATP1A1,CALM2,CAPG,CBLB,CDC42,CLTC,CTBP1,CTNNB1,DAP,DAPK3,DDB1,DDX5,DPYSL3,EPB41L2,FN1,GRB2,RAPGEF1,GUSB,HDAC1,HSPA8,HSP90AA1,ILK,JUN,KPNB1,LAMP1,LAMP2,MCL1,MDM2,MYH9,HNRNPM,NFE2L1,NUMA1,OSBP,PRKAR1A,RARA,RDX,RPS6KB1,SDC2,SH3BGRL,SON,SRP72,ST13,TOP1,VCP,VIM,YWHAB,YWHAE,MAFK,FZD4,IQGAP1,SQSTM1,HGS,QKI,BCAR1,YWHAQ,CBX3,CNOT1,ARFIP2,DBNL,NDFIP2,ENAH,NDFIP1,WBP2NL,TUB…
18_Member	GO Molecular Functions	GO:0019904	protein domain specific binding	-15.4282	-13.0473	71/703	25,92,351,392,400,468,476,805,822,868,998,1213,1487,1499,1611,1613,1642,1655,1809,2037,2335,2885,2889,2990,3065,3312,3320,3611,3725,3837,3916,3920,4170,4193,4627,4670,4779,4926,5007,5573,5914,5962,6198,6383,6451,6651,6731,6767,7150,7415,7431,7529,7531,7975,8322,8826,8878,9146,9444,9564,10971,11335,23019,23647,28988,54602,55740,80762,164684,203068,285590	ABL1,ACVR2A,APP,ARHGAP1,ARL1,ATF4,ATP1A1,CALM2,CAPG,CBLB,CDC42,CLTC,CTBP1,CTNNB1,DAP,DAPK3,DDB1,DDX5,DPYSL3,EPB41L2,FN1,GRB2,RAPGEF1,GUSB,HDAC1,HSPA8,HSP90AA1,ILK,JUN,KPNB1,LAMP1,LAMP2,MCL1,MDM2,MYH9,HNRNPM,NFE2L1,NUMA1,OSBP,PRKAR1A,RARA,RDX,RPS6KB1,SDC2,SH3BGRL,SON,SRP72,ST13,TOP1,VCP,VIM,YWHAB,YWHAE,MAFK,FZD4,IQGAP1,SQSTM1,HGS,QKI,BCAR1,YWHAQ,CBX3,CNOT1,ARFIP2,DBNL,NDFIP2,ENAH,NDFIP1,WBP2NL,TUB…
19_Summary	GO Cellular Components	GO:0005938	cell cortex	-15.311	-12.9346	44/302	60,81,302,800,830,998,1211,1212,1487,1490,1499,1500,1522,1915,2017,2023,2037,2319,2934,3092,3927,4627,4628,4691,4739,4926,5048,5962,6513,6709,9948,10097,10121,10487,10539,10890,11034,22919,23603,23647,26064,28988,80762,90102,821,3192,3799,4134,5573,6421,23011,55207,79971	ACTB,ACTN4,ANXA2,CALD1,CAPZA2,CDC42,CLTA,CLTB,CTBP1,CCN2,CTNNB1,CTNND1,CTSZ,EEF1A1,CTTN,ENO1,EPB41L2,FLOT2,GSN,HIP1,LASP1,MYH9,MYH10,NCL,NEDD9,NUMA1,PAFAH1B1,RDX,SLC2A1,SPTAN1,WDR1,ACTR2,ACTR1A,CAP1,GLRX3,RAB10,DSTN,MAPRE1,CORO1C,ARFIP2,RAI14,DBNL,NDFIP1,PHLDB2,CANX,HNRNPU,KIF5B,MAP4,PRKAR1A,SFPQ,RAB21,ARL8B,WLS
19_Member	GO Cellular Components	GO:0005938	cell cortex	-15.311	-12.9346	44/302	60,81,302,800,830,998,1211,1212,1487,1490,1499,1500,1522,1915,2017,2023,2037,2319,2934,3092,3927,4627,4628,4691,4739,4926,5048,5962,6513,6709,9948,10097,10121,10487,10539,10890,11034,22919,23603,23647,26064,28988,80762,90102	ACTB,ACTN4,ANXA2,CALD1,CAPZA2,CDC42,CLTA,CLTB,CTBP1,CCN2,CTNNB1,CTNND1,CTSZ,EEF1A1,CTTN,ENO1,EPB41L2,FLOT2,GSN,HIP1,LASP1,MYH9,MYH10,NCL,NEDD9,NUMA1,PAFAH1B1,RDX,SLC2A1,SPTAN1,WDR1,ACTR2,ACTR1A,CAP1,GLRX3,RAB10,DSTN,MAPRE1,CORO1C,ARFIP2,RAI14,DBNL,NDFIP1,PHLDB2
19_Member	GO Cellular Components	GO:0044448	cell cortex part	-13.2248	-10.9305	31/176	60,81,800,830,1211,1212,1487,1499,1500,1522,1915,2017,2023,2037,2319,2934,3092,3927,4627,4926,5962,6513,6709,9948,10097,10121,10487,10890,11034,22919,90102	ACTB,ACTN4,CALD1,CAPZA2,CLTA,CLTB,CTBP1,CTNNB1,CTNND1,CTSZ,EEF1A1,CTTN,ENO1,EPB41L2,FLOT2,GSN,HIP1,LASP1,MYH9,NUMA1,RDX,SLC2A1,SPTAN1,WDR1,ACTR2,ACTR1A,CAP1,RAB10,DSTN,MAPRE1,PHLDB2
19_Member	GO Cellular Components	GO:0099568	cytoplasmic region	-12.8319	-10.5631	53/489	60,81,302,800,821,830,998,1211,1212,1487,1490,1499,1500,1522,1915,2017,2023,2037,2319,2934,3092,3192,3799,3927,4134,4627,4628,4691,4739,4926,5048,5573,5962,6421,6513,6709,9948,10097,10121,10487,10539,10890,11034,22919,23011,23603,23647,26064,28988,55207,79971,80762,90102	ACTB,ACTN4,ANXA2,CALD1,CANX,CAPZA2,CDC42,CLTA,CLTB,CTBP1,CCN2,CTNNB1,CTNND1,CTSZ,EEF1A1,CTTN,ENO1,EPB41L2,FLOT2,GSN,HIP1,HNRNPU,KIF5B,LASP1,MAP4,MYH9,MYH10,NCL,NEDD9,NUMA1,PAFAH1B1,PRKAR1A,RDX,SFPQ,SLC2A1,SPTAN1,WDR1,ACTR2,ACTR1A,CAP1,GLRX3,RAB10,DSTN,MAPRE1,RAB21,CORO1C,ARFIP2,RAI14,DBNL,ARL8B,WLS,NDFIP1,PHLDB2
19_Member	GO Cellular Components	GO:0030863	cortical cytoskeleton	-9.84783	-7.80926	21/110	60,81,800,830,1915,2017,2037,2319,2934,3092,3927,4627,4926,5962,6513,6709,9948,10097,10487,11034,22919	ACTB,ACTN4,CALD1,CAPZA2,EEF1A1,CTTN,EPB41L2,FLOT2,GSN,HIP1,LASP1,MYH9,NUMA1,RDX,SLC2A1,SPTAN1,WDR1,ACTR2,CAP1,DSTN,MAPRE1
19_Member	GO Cellular Components	GO:0030864	cortical actin cytoskeleton	-7.72003	-5.87983	16/83	800,830,1915,2037,2319,2934,3092,3927,4627,5962,6513,6709,9948,10097,10487,11034	CALD1,CAPZA2,EEF1A1,EPB41L2,FLOT2,GSN,HIP1,LASP1,MYH9,RDX,SLC2A1,SPTAN1,WDR1,ACTR2,CAP1,DSTN
20_Summary	GO Cellular Components	GO:0030139	endocytic vesicle	-14.8217	-12.4586	43/298	71,101,163,527,567,972,1173,1211,1212,1213,2319,2889,2923,2934,3092,3320,3685,3693,3799,3916,3920,4035,4193,4641,6233,6678,7184,7431,7791,7879,8218,8301,8322,8766,8992,9114,9230,10525,10890,23166,30845,51552,79971,301,307,334,488,682,960,965,1650,2885,3312,3460,3998,5066,5861,5879,6396,8615,8826,9784,10159,10175,10857,10959,10972,22820,22872,22931,22937,23011,23352,23423,25932,28988,56681,57153,7…	ACTG1,ADAM8,AP2B1,ATP6V0C,B2M,CD74,AP2M1,CLTA,CLTB,CLTC,FLOT2,RAPGEF1,PDIA3,GSN,HIP1,HSP90AA1,ITGAV,ITGB5,KIF5B,LAMP1,LAMP2,LRP1,MDM2,MYO1C,RPS27A,SPARC,HSP90B1,VIM,ZYX,RAB7A,CLTCL1,PICALM,FZD4,RAB11A,ATP6V0E1,ATP6V0D1,RAB11B,HYOU1,RAB10,STAB1,EHD3,RAB14,WLS,ANXA1,ANXA4,APLP2,ATP2A2,BSG,CD44,CD58,DDOST,GRB2,HSPA8,IFNGR2,LMAN1,PAM,RAB1A,RAC1,SEC13,USO1,IQGAP1,SNX17,ATP6AP2,CNIH1,PGRMC1,TMED2,TMED1…
20_Member	GO Cellular Components	GO:0030139	endocytic vesicle	-14.8217	-12.4586	43/298	71,101,163,527,567,972,1173,1211,1212,1213,2319,2889,2923,2934,3092,3320,3685,3693,3799,3916,3920,4035,4193,4641,6233,6678,7184,7431,7791,7879,8218,8301,8322,8766,8992,9114,9230,10525,10890,23166,30845,51552,79971	ACTG1,ADAM8,AP2B1,ATP6V0C,B2M,CD74,AP2M1,CLTA,CLTB,CLTC,FLOT2,RAPGEF1,PDIA3,GSN,HIP1,HSP90AA1,ITGAV,ITGB5,KIF5B,LAMP1,LAMP2,LRP1,MDM2,MYO1C,RPS27A,SPARC,HSP90B1,VIM,ZYX,RAB7A,CLTCL1,PICALM,FZD4,RAB11A,ATP6V0E1,ATP6V0D1,RAB11B,HYOU1,RAB10,STAB1,EHD3,RAB14,WLS
20_Member	GO Cellular Components	GO:0012506	vesicle membrane	-12.4734	-10.2417	70/787	101,163,301,307,334,488,527,567,682,960,965,972,1173,1211,1212,1213,1650,2319,2885,2889,3092,3312,3460,3685,3916,3920,3998,4035,4193,4641,5066,5861,5879,6233,6396,6678,7879,8218,8301,8322,8615,8766,8826,8992,9114,9230,9784,10159,10175,10857,10890,10959,10972,22820,22872,22931,22937,23011,23166,23352,23423,25932,28988,51552,56681,57153,79567,79971,84061,127262	ADAM8,AP2B1,ANXA1,ANXA4,APLP2,ATP2A2,ATP6V0C,B2M,BSG,CD44,CD58,CD74,AP2M1,CLTA,CLTB,CLTC,DDOST,FLOT2,GRB2,RAPGEF1,HIP1,HSPA8,IFNGR2,ITGAV,LAMP1,LAMP2,LMAN1,LRP1,MDM2,MYO1C,PAM,RAB1A,RAC1,RPS27A,SEC13,SPARC,RAB7A,CLTCL1,PICALM,FZD4,USO1,RAB11A,IQGAP1,ATP6V0E1,ATP6V0D1,RAB11B,SNX17,ATP6AP2,CNIH1,PGRMC1,RAB10,TMED2,TMED10,COPG1,SEC31A,RAB18,SCAP,RAB21,STAB1,UBR4,TMED3,CLIC4,DBNL,RAB14,SAR1A,SLC44A2,…
20_Member	GO Cellular Components	GO:0030659	cytoplasmic vesicle membrane	-11.1654	-9.02938	66/766	101,163,301,334,527,567,682,960,965,972,1173,1211,1212,1213,1650,2319,2889,3092,3312,3460,3685,3916,3920,3998,4035,4193,4641,5066,5861,5879,6233,6396,6678,7879,8218,8301,8322,8615,8766,8826,8992,9114,9230,9784,10159,10175,10857,10890,10959,10972,22820,22872,22931,22937,23011,23166,23352,23423,25932,28988,51552,56681,57153,79971,84061,127262	ADAM8,AP2B1,ANXA1,APLP2,ATP6V0C,B2M,BSG,CD44,CD58,CD74,AP2M1,CLTA,CLTB,CLTC,DDOST,FLOT2,RAPGEF1,HIP1,HSPA8,IFNGR2,ITGAV,LAMP1,LAMP2,LMAN1,LRP1,MDM2,MYO1C,PAM,RAB1A,RAC1,RPS27A,SEC13,SPARC,RAB7A,CLTCL1,PICALM,FZD4,USO1,RAB11A,IQGAP1,ATP6V0E1,ATP6V0D1,RAB11B,SNX17,ATP6AP2,CNIH1,PGRMC1,RAB10,TMED2,TMED10,COPG1,SEC31A,RAB18,SCAP,RAB21,STAB1,UBR4,TMED3,CLIC4,DBNL,RAB14,SAR1A,SLC44A2,WLS,MAGT1,TPRG1L
20_Member	GO Cellular Components	GO:0045335	phagocytic vesicle	-9.36277	-7.3788	22/128	71,101,527,567,2889,2923,2934,3685,3693,3799,3916,3920,4641,7431,7791,7879,8766,8992,9114,9230,10890,51552	ACTG1,ADAM8,ATP6V0C,B2M,RAPGEF1,PDIA3,GSN,ITGAV,ITGB5,KIF5B,LAMP1,LAMP2,MYO1C,VIM,ZYX,RAB7A,RAB11A,ATP6V0E1,ATP6V0D1,RAB11B,RAB10,RAB14
20_Member	GO Cellular Components	GO:0030666	endocytic vesicle membrane	-7.21304	-5.4178	22/166	163,527,567,972,1173,1213,2889,3092,3916,3920,4035,4193,6233,7879,8301,8322,8992,9114,9230,10890,23166,79971	AP2B1,ATP6V0C,B2M,CD74,AP2M1,CLTC,RAPGEF1,HIP1,LAMP1,LAMP2,LRP1,MDM2,RPS27A,RAB7A,PICALM,FZD4,ATP6V0E1,ATP6V0D1,RAB11B,RAB10,STAB1,WLS
20_Member	GO Cellular Components	GO:0030667	secretory granule membrane	-4.85197	-3.34877	26/298	101,334,527,682,960,965,1650,2319,3685,3916,3920,5066,5879,6678,7879,8826,10159,10857,10890,10959,10972,22931,23352,51552,57153,84061	ADAM8,APLP2,ATP6V0C,BSG,CD44,CD58,DDOST,FLOT2,ITGAV,LAMP1,LAMP2,PAM,RAC1,SPARC,RAB7A,IQGAP1,ATP6AP2,PGRMC1,RAB10,TMED2,TMED10,RAB18,UBR4,RAB14,SLC44A2,MAGT1
20_Member	GO Cellular Components	GO:0030670	phagocytic vesicle membrane	-3.67828	-2.34282	10/74	527,567,2889,3916,3920,7879,8992,9114,9230,10890	ATP6V0C,B2M,RAPGEF1,LAMP1,LAMP2,RAB7A,ATP6V0E1,ATP6V0D1,RAB11B,RAB10

## Sheet: Sheet2 high expressed-KEGG
GroupID	Category	Term	Description	LogP	Log(q-value)	InTerm_InList	Genes	Symbols
1_Summary	KEGG Pathway	hsa03010	Ribosome	-28.7105	-26.0168	45/154	4736,6122,6124,6125,6128,6130,6132,6133,6135,6136,6137,6138,6142,6152,6154,6155,6156,6157,6159,6160,6165,6168,6169,6181,6187,6189,6191,6193,6201,6202,6205,6206,6207,6210,6217,6222,6223,6224,6228,6229,6233,6235,9349,11224,25873	RPL10A,RPL3,RPL4,RPL5,RPL6,RPL7A,RPL8,RPL9,RPL11,RPL12,RPL13,RPL15,RPL18A,RPL24,RPL26,RPL27,RPL30,RPL27A,RPL29,RPL31,RPL35A,RPL37A,RPL38,RPLP2,RPS2,RPS3A,RPS4X,RPS5,RPS7,RPS8,RPS11,RPS12,RPS13,RPS15A,RPS16,RPS18,RPS19,RPS20,RPS23,RPS24,RPS27A,RPS29,RPL23,RPL35,RPL36
1_Member	KEGG Pathway	hsa03010	Ribosome	-28.7105	-26.0168	45/154	4736,6122,6124,6125,6128,6130,6132,6133,6135,6136,6137,6138,6142,6152,6154,6155,6156,6157,6159,6160,6165,6168,6169,6181,6187,6189,6191,6193,6201,6202,6205,6206,6207,6210,6217,6222,6223,6224,6228,6229,6233,6235,9349,11224,25873	RPL10A,RPL3,RPL4,RPL5,RPL6,RPL7A,RPL8,RPL9,RPL11,RPL12,RPL13,RPL15,RPL18A,RPL24,RPL26,RPL27,RPL30,RPL27A,RPL29,RPL31,RPL35A,RPL37A,RPL38,RPLP2,RPS2,RPS3A,RPS4X,RPS5,RPS7,RPS8,RPS11,RPS12,RPS13,RPS15A,RPS16,RPS18,RPS19,RPS20,RPS23,RPS24,RPS27A,RPS29,RPL23,RPL35,RPL36
2_Summary	KEGG Pathway	hsa04142	Lysosome	-16.8877	-14.495	30/123	411,427,527,1075,1200,1211,1212,1213,1508,1509,1512,1513,1520,1522,2760,2990,3073,3074,3916,3920,3988,4668,4891,5641,8218,8763,9114,9741,10577,26088	ARSB,ASAH1,ATP6V0C,CTSC,TPP1,CLTA,CLTB,CLTC,CTSB,CTSD,CTSH,CTSK,CTSS,CTSZ,GM2A,GUSB,HEXA,HEXB,LAMP1,LAMP2,LIPA,NAGA,SLC11A2,LGMN,CLTCL1,CD164,ATP6V0D1,LAPTM4A,NPC2,GGA1
2_Member	KEGG Pathway	hsa04142	Lysosome	-16.8877	-14.495	30/123	411,427,527,1075,1200,1211,1212,1213,1508,1509,1512,1513,1520,1522,2760,2990,3073,3074,3916,3920,3988,4668,4891,5641,8218,8763,9114,9741,10577,26088	ARSB,ASAH1,ATP6V0C,CTSC,TPP1,CLTA,CLTB,CLTC,CTSB,CTSD,CTSH,CTSK,CTSS,CTSZ,GM2A,GUSB,HEXA,HEXB,LAMP1,LAMP2,LIPA,NAGA,SLC11A2,LGMN,CLTCL1,CD164,ATP6V0D1,LAPTM4A,NPC2,GGA1
3_Summary	KEGG Pathway	hsa04510	Focal adhesion	-16.4639	-14.2473	37/199	60,71,81,998,1277,1278,1284,1291,1292,1293,1499,2335,2885,2889,3371,3611,3655,3685,3688,3693,3725,3912,3913,3915,5499,5500,5604,5879,6093,6464,7058,7414,7422,7791,8516,9475,9564,960,3339,6382,6385,468,1978,2247,2782,2788,3320,4170,4193,6198,7184,7529,7531,10971,11140,90993,7043,7879,2771,3312,3460,6774,54205	ACTB,ACTG1,ACTN4,CDC42,COL1A1,COL1A2,COL4A2,COL6A1,COL6A2,COL6A3,CTNNB1,FN1,GRB2,RAPGEF1,TNC,ILK,ITGA6,ITGAV,ITGB1,ITGB5,JUN,LAMB1,LAMB2,LAMC1,PPP1CA,PPP1CB,MAP2K1,RAC1,ROCK1,SHC1,THBS2,VCL,VEGFA,ZYX,ITGA8,ROCK2,BCAR1,CD44,HSPG2,SDC1,SDC4,ATF4,EIF4EBP1,FGF2,GNB1,GNG7,HSP90AA1,MCL1,MDM2,RPS6KB1,HSP90B1,YWHAB,YWHAE,YWHAQ,CDC37,CREB3L1,TGFB3,RAB7A,GNAI2,HSPA8,IFNGR2,STAT3,CYCS
3_Member	KEGG Pathway	hsa04510	Focal adhesion	-16.4639	-14.2473	37/199	60,71,81,998,1277,1278,1284,1291,1292,1293,1499,2335,2885,2889,3371,3611,3655,3685,3688,3693,3725,3912,3913,3915,5499,5500,5604,5879,6093,6464,7058,7414,7422,7791,8516,9475,9564	ACTB,ACTG1,ACTN4,CDC42,COL1A1,COL1A2,COL4A2,COL6A1,COL6A2,COL6A3,CTNNB1,FN1,GRB2,RAPGEF1,TNC,ILK,ITGA6,ITGAV,ITGB1,ITGB5,JUN,LAMB1,LAMB2,LAMC1,PPP1CA,PPP1CB,MAP2K1,RAC1,ROCK1,SHC1,THBS2,VCL,VEGFA,ZYX,ITGA8,ROCK2,BCAR1
3_Member	KEGG Pathway	hsa04512	ECM-receptor interaction	-12.4661	-10.6755	21/82	960,1277,1278,1284,1291,1292,1293,2335,3339,3371,3655,3685,3688,3693,3912,3913,3915,6382,6385,7058,8516	CD44,COL1A1,COL1A2,COL4A2,COL6A1,COL6A2,COL6A3,FN1,HSPG2,TNC,ITGA6,ITGAV,ITGB1,ITGB5,LAMB1,LAMB2,LAMC1,SDC1,SDC4,THBS2,ITGA8
3_Member	KEGG Pathway	hsa04151	PI3K-Akt signaling pathway	-8.55903	-7.0414	36/342	468,1277,1278,1284,1291,1292,1293,1978,2247,2335,2782,2788,2885,3320,3371,3655,3685,3688,3693,3912,3913,3915,4170,4193,5604,5879,6198,7058,7184,7422,7529,7531,8516,10971,11140,90993	ATF4,COL1A1,COL1A2,COL4A2,COL6A1,COL6A2,COL6A3,EIF4EBP1,FGF2,FN1,GNB1,GNG7,GRB2,HSP90AA1,TNC,ITGA6,ITGAV,ITGB1,ITGB5,LAMB1,LAMB2,LAMC1,MCL1,MDM2,MAP2K1,RAC1,RPS6KB1,THBS2,HSP90B1,VEGFA,YWHAB,YWHAE,ITGA8,YWHAQ,CDC37,CREB3L1
3_Member	KEGG Pathway	hsa05146	Amoebiasis	-3.34935	-2.44095	11/96	81,1277,1278,1284,2335,3912,3913,3915,7043,7414,7879	ACTN4,COL1A1,COL1A2,COL4A2,FN1,LAMB1,LAMB2,LAMC1,TGFB3,VCL,RAB7A
3_Member	KEGG Pathway	hsa05145	Toxoplasmosis	-2.75773	-1.92732	11/113	2771,3312,3460,3655,3688,3912,3913,3915,6774,7043,54205	GNAI2,HSPA8,IFNGR2,ITGA6,ITGB1,LAMB1,LAMB2,LAMC1,STAT3,TGFB3,CYCS
3_Member	KEGG Pathway	hsa05222	Small cell lung cancer	-2.63432	-1.83268	9/84	1284,2335,3655,3685,3688,3912,3913,3915,54205	COL4A2,FN1,ITGA6,ITGAV,ITGB1,LAMB1,LAMB2,LAMC1,CYCS
4_Summary	KEGG Pathway	hsa05205	Proteoglycans in cancer	-16.168	-14.0763	37/203	60,71,868,960,998,1499,1634,1655,2017,2247,2335,2719,2885,3339,3685,3688,3693,4060,4193,4478,5499,5500,5604,5879,5962,6093,6198,6382,6383,6385,6774,7078,7422,8322,8826,9475,10855,1211,1212,1213,1495,3611,6464,7414,8218,9564,10092,10093,10109,10552,81,1073,2934,3655,4627,4628,5217,8394,8516,28964,55740,25,4691,7277,10971,84617,203068,1778,1781,2353,3460,3725,7879,89953,1500,2771,4267,7070,3308,853…	ACTB,ACTG1,CBLB,CD44,CDC42,CTNNB1,DCN,DDX5,CTTN,FGF2,FN1,GPC3,GRB2,HSPG2,ITGAV,ITGB1,ITGB5,LUM,MDM2,MSN,PPP1CA,PPP1CB,MAP2K1,RAC1,RDX,ROCK1,RPS6KB1,SDC1,SDC2,SDC4,STAT3,TIMP3,VEGFA,FZD4,IQGAP1,ROCK2,HPSE,CLTA,CLTB,CLTC,CTNNA1,ILK,SHC1,VCL,CLTCL1,BCAR1,ARPC5,ARPC4,ARPC2,ARPC1A,ACTN4,CFL2,GSN,ITGA6,MYH9,MYH10,PFN2,PIP5K1A,ITGA8,GIT1,ENAH,ABL1,NCL,TUBA4A,YWHAQ,TUBB6,TUBB,DYNC1H1,DYNC1I2,FOS,IFNGR2,J…
4_Member	KEGG Pathway	hsa05205	Proteoglycans in cancer	-16.168	-14.0763	37/203	60,71,868,960,998,1499,1634,1655,2017,2247,2335,2719,2885,3339,3685,3688,3693,4060,4193,4478,5499,5500,5604,5879,5962,6093,6198,6382,6383,6385,6774,7078,7422,8322,8826,9475,10855	ACTB,ACTG1,CBLB,CD44,CDC42,CTNNB1,DCN,DDX5,CTTN,FGF2,FN1,GPC3,GRB2,HSPG2,ITGAV,ITGB1,ITGB5,LUM,MDM2,MSN,PPP1CA,PPP1CB,MAP2K1,RAC1,RDX,ROCK1,RPS6KB1,SDC1,SDC2,SDC4,STAT3,TIMP3,VEGFA,FZD4,IQGAP1,ROCK2,HPSE
4_Member	KEGG Pathway	hsa05100	Bacterial invasion of epithelial cells	-14.246	-12.2513	22/76	60,71,868,998,1211,1212,1213,1495,1499,2017,2335,3611,3688,5879,6464,7414,8218,9564,10092,10093,10109,10552	ACTB,ACTG1,CBLB,CDC42,CLTA,CLTB,CLTC,CTNNA1,CTNNB1,CTTN,FN1,ILK,ITGB1,RAC1,SHC1,VCL,CLTCL1,BCAR1,ARPC5,ARPC4,ARPC2,ARPC1A
4_Member	KEGG Pathway	hsa04810	Regulation of actin cytoskeleton	-13.2003	-11.2847	34/212	60,71,81,998,1073,2247,2335,2934,3655,3685,3688,3693,4478,4627,4628,5217,5499,5500,5604,5879,5962,6093,7414,8394,8516,8826,9475,9564,10092,10093,10109,10552,28964,55740	ACTB,ACTG1,ACTN4,CDC42,CFL2,FGF2,FN1,GSN,ITGA6,ITGAV,ITGB1,ITGB5,MSN,MYH9,MYH10,PFN2,PPP1CA,PPP1CB,MAP2K1,RAC1,RDX,ROCK1,VCL,PIP5K1A,ITGA8,IQGAP1,ROCK2,BCAR1,ARPC5,ARPC4,ARPC2,ARPC1A,GIT1,ENAH
4_Member	KEGG Pathway	hsa05130	Pathogenic Escherichia coli infection	-12.8068	-10.9581	18/55	25,60,71,998,1499,2017,3688,4691,6093,7277,9475,10092,10093,10109,10552,10971,84617,203068	ABL1,ACTB,ACTG1,CDC42,CTNNB1,CTTN,ITGB1,NCL,ROCK1,TUBA4A,ROCK2,ARPC5,ARPC4,ARPC2,ARPC1A,YWHAQ,TUBB6,TUBB
4_Member	KEGG Pathway	hsa05132	Salmonella infection	-11.0609	-9.40853	20/86	60,71,998,1778,1781,2353,3460,3725,4627,4628,5217,5879,6093,7879,9475,10092,10093,10109,10552,89953	ACTB,ACTG1,CDC42,DYNC1H1,DYNC1I2,FOS,IFNGR2,JUN,MYH9,MYH10,PFN2,RAC1,ROCK1,RAB7A,ROCK2,ARPC5,ARPC4,ARPC2,ARPC1A,KLC4
4_Member	KEGG Pathway	hsa05131	Shigellosis	-9.3717	-7.8241	16/65	25,60,71,960,998,2017,3688,5217,5879,6093,7414,9475,10092,10093,10109,10552	ABL1,ACTB,ACTG1,CD44,CDC42,CTTN,ITGB1,PFN2,RAC1,ROCK1,VCL,ROCK2,ARPC5,ARPC4,ARPC2,ARPC1A
4_Member	KEGG Pathway	hsa04670	Leukocyte transendothelial migration	-6.45552	-5.142	17/114	60,71,81,998,1495,1499,1500,2771,3688,4267,4478,5879,6093,7070,7414,9475,9564	ACTB,ACTG1,ACTN4,CDC42,CTNNA1,CTNNB1,CTNND1,GNAI2,ITGB1,CD99,MSN,RAC1,ROCK1,THY1,VCL,ROCK2,BCAR1
4_Member	KEGG Pathway	hsa04530	Tight junction	-6.39217	-5.09639	21/170	60,71,81,998,2017,3308,3688,3725,4478,4627,4628,5879,5962,6093,7277,8531,9475,10096,10097,23513,79778	ACTB,ACTG1,ACTN4,CDC42,CTTN,HSPA4,ITGB1,JUN,MSN,MYH9,MYH10,RAC1,RDX,ROCK1,TUBA4A,YBX3,ROCK2,ACTR3,ACTR2,SCRIB,MICALL2
4_Member	KEGG Pathway	hsa04520	Adherens junction	-5.248	-4.04563	12/72	60,71,81,998,1495,1499,1500,4089,5879,6591,7414,8826	ACTB,ACTG1,ACTN4,CDC42,CTNNA1,CTNNB1,CTNND1,SMAD4,RAC1,SNAI2,VCL,IQGAP1
4_Member	KEGG Pathway	hsa04666	Fc gamma R-mediated phagocytosis	-3.55255	-2.6147	11/91	998,1073,2934,5604,5879,6198,8394,10092,10093,10109,10552	CDC42,CFL2,GSN,MAP2K1,RAC1,RPS6KB1,PIP5K1A,ARPC5,ARPC4,ARPC2,ARPC1A
4_Member	KEGG Pathway	hsa04015	Rap1 signaling pathway	-2.21643	-1.5102	15/210	60,71,805,998,1499,1500,2247,2771,2889,3688,5217,5604,5879,7422,9564	ACTB,ACTG1,CALM2,CDC42,CTNNB1,CTNND1,FGF2,GNAI2,RAPGEF1,ITGB1,PFN2,MAP2K1,RAC1,VEGFA,BCAR1
5_Summary	KEGG Pathway	hsa05200	Pathways in cancer	-11.7226	-9.98312	45/395	25,405,868,998,1284,1487,1495,1499,1613,1855,2247,2335,2353,2771,2782,2788,2885,3065,3066,3320,3655,3685,3688,3725,3728,3912,3913,3915,4089,4193,5604,5879,5914,6093,6513,6774,7043,7184,7422,8322,9475,9826,10342,10928,54205	ABL1,ARNT,CBLB,CDC42,COL4A2,CTBP1,CTNNA1,CTNNB1,DAPK3,DVL1,FGF2,FN1,FOS,GNAI2,GNB1,GNG7,GRB2,HDAC1,HDAC2,HSP90AA1,ITGA6,ITGAV,ITGB1,JUN,JUP,LAMB1,LAMB2,LAMC1,SMAD4,MDM2,MAP2K1,RAC1,RARA,ROCK1,SLC2A1,STAT3,TGFB3,HSP90B1,VEGFA,FZD4,ROCK2,ARHGEF11,TFG,RALBP1,CYCS
5_Member	KEGG Pathway	hsa05200	Pathways in cancer	-11.7226	-9.98312	45/395	25,405,868,998,1284,1487,1495,1499,1613,1855,2247,2335,2353,2771,2782,2788,2885,3065,3066,3320,3655,3685,3688,3725,3728,3912,3913,3915,4089,4193,5604,5879,5914,6093,6513,6774,7043,7184,7422,8322,9475,9826,10342,10928,54205	ABL1,ARNT,CBLB,CDC42,COL4A2,CTBP1,CTNNA1,CTNNB1,DAPK3,DVL1,FGF2,FN1,FOS,GNAI2,GNB1,GNG7,GRB2,HDAC1,HDAC2,HSP90AA1,ITGA6,ITGAV,ITGB1,JUN,JUP,LAMB1,LAMB2,LAMC1,SMAD4,MDM2,MAP2K1,RAC1,RARA,ROCK1,SLC2A1,STAT3,TGFB3,HSP90B1,VEGFA,FZD4,ROCK2,ARHGEF11,TFG,RALBP1,CYCS
6_Summary	KEGG Pathway	hsa05016	Huntington's disease	-11.3643	-9.67055	30/193	163,506,513,515,518,1173,1211,1212,1213,1327,1345,1347,3065,3066,3092,4697,4719,4723,5434,6390,6391,7384,7385,7388,7417,7419,8218,10476,54205,90993,526,527,8992,9114,10063,2771,7332,351,488,805,4035,57142,70,476,785,4634,7139,468,998,3725,5879,9021	AP2B1,ATP5F1B,ATP5F1D,ATP5PB,ATP5MC3,AP2M1,CLTA,CLTB,CLTC,COX4I1,COX6C,COX7A2,HDAC1,HDAC2,HIP1,NDUFA4,NDUFS1,NDUFV1,POLR2E,SDHB,SDHC,UQCRC1,UQCRC2,UQCRH,VDAC2,VDAC3,CLTCL1,ATP5PD,CYCS,CREB3L1,ATP6V1B2,ATP6V0C,ATP6V0E1,ATP6V0D1,COX17,GNAI2,UBE2L3,APP,ATP2A2,CALM2,LRP1,RTN4,ACTC1,ATP1A1,CACNB4,MYL3,TNNT2,ATF4,CDC42,JUN,RAC1,SOCS3
6_Member	KEGG Pathway	hsa05016	Huntington's disease	-11.3643	-9.67055	30/193	163,506,513,515,518,1173,1211,1212,1213,1327,1345,1347,3065,3066,3092,4697,4719,4723,5434,6390,6391,7384,7385,7388,7417,7419,8218,10476,54205,90993	AP2B1,ATP5F1B,ATP5F1D,ATP5PB,ATP5MC3,AP2M1,CLTA,CLTB,CLTC,COX4I1,COX6C,COX7A2,HDAC1,HDAC2,HIP1,NDUFA4,NDUFS1,NDUFV1,POLR2E,SDHB,SDHC,UQCRC1,UQCRC2,UQCRH,VDAC2,VDAC3,CLTCL1,ATP5PD,CYCS,CREB3L1
6_Member	KEGG Pathway	hsa00190	Oxidative phosphorylation	-8.27689	-6.78728	21/133	506,513,515,518,526,527,1327,1345,1347,4697,4719,4723,6390,6391,7384,7385,7388,8992,9114,10063,10476	ATP5F1B,ATP5F1D,ATP5PB,ATP5MC3,ATP6V1B2,ATP6V0C,COX4I1,COX6C,COX7A2,NDUFA4,NDUFS1,NDUFV1,SDHB,SDHC,UQCRC1,UQCRC2,UQCRH,ATP6V0E1,ATP6V0D1,COX17,ATP5PD
6_Member	KEGG Pathway	hsa05012	Parkinson's disease	-7.75757	-6.31912	21/142	506,513,515,518,1327,1345,1347,2771,4697,4719,4723,6390,6391,7332,7384,7385,7388,7417,7419,10476,54205	ATP5F1B,ATP5F1D,ATP5PB,ATP5MC3,COX4I1,COX6C,COX7A2,GNAI2,NDUFA4,NDUFS1,NDUFV1,SDHB,SDHC,UBE2L3,UQCRC1,UQCRC2,UQCRH,VDAC2,VDAC3,ATP5PD,CYCS
6_Member	KEGG Pathway	hsa05010	Alzheimer's disease	-6.98028	-5.58759	22/171	351,488,506,513,515,518,805,1327,1345,1347,4035,4697,4719,4723,6390,6391,7384,7385,7388,10476,54205,57142	APP,ATP2A2,ATP5F1B,ATP5F1D,ATP5PB,ATP5MC3,CALM2,COX4I1,COX6C,COX7A2,LRP1,NDUFA4,NDUFS1,NDUFV1,SDHB,SDHC,UQCRC1,UQCRC2,UQCRH,ATP5PD,CYCS,RTN4
6_Member	KEGG Pathway	hsa04260	Cardiac muscle contraction	-4.87834	-3.71609	12/78	70,476,488,785,1327,1345,1347,4634,7139,7384,7385,7388	ACTC1,ATP1A1,ATP2A2,CACNB4,COX4I1,COX6C,COX7A2,MYL3,TNNT2,UQCRC1,UQCRC2,UQCRH
6_Member	KEGG Pathway	hsa04932	Non-alcoholic fatty liver disease (NAFLD)	-4.83095	-3.68129	17/149	468,998,1327,1345,1347,3725,4697,4719,4723,5879,6390,6391,7384,7385,7388,9021,54205	ATF4,CDC42,COX4I1,COX6C,COX7A2,JUN,NDUFA4,NDUFS1,NDUFV1,RAC1,SDHB,SDHC,UQCRC1,UQCRC2,UQCRH,SOCS3,CYCS
7_Summary	KEGG Pathway	hsa04144	Endocytosis	-10.6303	-9.01571	34/260	163,830,832,868,998,1173,1211,1212,1213,3312,3799,4193,7043,7879,8218,8394,8729,8766,9146,9230,10015,10092,10093,10109,10552,10890,28964,29934,30845,51100,51160,57154,58533,128866	AP2B1,CAPZA2,CAPZB,CBLB,CDC42,AP2M1,CLTA,CLTB,CLTC,HSPA8,KIF5B,MDM2,TGFB3,RAB7A,CLTCL1,PIP5K1A,GBF1,RAB11A,HGS,RAB11B,PDCD6IP,ARPC5,ARPC4,ARPC2,ARPC1A,RAB10,GIT1,SNX12,EHD3,SH3GLB1,VPS28,SMURF1,SNX6,CHMP4B
7_Member	KEGG Pathway	hsa04144	Endocytosis	-10.6303	-9.01571	34/260	163,830,832,868,998,1173,1211,1212,1213,3312,3799,4193,7043,7879,8218,8394,8729,8766,9146,9230,10015,10092,10093,10109,10552,10890,28964,29934,30845,51100,51160,57154,58533,128866	AP2B1,CAPZA2,CAPZB,CBLB,CDC42,AP2M1,CLTA,CLTB,CLTC,HSPA8,KIF5B,MDM2,TGFB3,RAB7A,CLTCL1,PIP5K1A,GBF1,RAB11A,HGS,RAB11B,PDCD6IP,ARPC5,ARPC4,ARPC2,ARPC1A,RAB10,GIT1,SNX12,EHD3,SH3GLB1,VPS28,SMURF1,SNX6,CHMP4B
8_Summary	KEGG Pathway	hsa04141	Protein processing in endoplasmic reticulum	-10.0113	-8.43151	26/166	468,821,1650,2923,3312,3320,3703,3998,5034,5611,6184,6185,6238,6396,6746,6747,7184,7323,7415,9601,10525,10960,22872,23193,30001,56681	ATF4,CANX,DDOST,PDIA3,HSPA8,HSP90AA1,STT3A,LMAN1,P4HB,DNAJC3,RPN1,RPN2,RRBP1,SEC13,SSR2,SSR3,HSP90B1,UBE2D3,VCP,PDIA4,HYOU1,LMAN2,SEC31A,GANAB,ERO1A,SAR1A
8_Member	KEGG Pathway	hsa04141	Protein processing in endoplasmic reticulum	-10.0113	-8.43151	26/166	468,821,1650,2923,3312,3320,3703,3998,5034,5611,6184,6185,6238,6396,6746,6747,7184,7323,7415,9601,10525,10960,22872,23193,30001,56681	ATF4,CANX,DDOST,PDIA3,HSPA8,HSP90AA1,STT3A,LMAN1,P4HB,DNAJC3,RPN1,RPN2,RRBP1,SEC13,SSR2,SSR3,HSP90B1,UBE2D3,VCP,PDIA4,HYOU1,LMAN2,SEC31A,GANAB,ERO1A,SAR1A
9_Summary	KEGG Pathway	hsa04145	Phagosome	-7.81339	-6.35011	22/154	60,71,526,527,821,1520,1778,1781,3685,3688,3693,3916,3920,5879,7058,7277,7879,8992,9114,9146,84617,203068,805,972,1051,1509,3313,3460,7043,54205	ACTB,ACTG1,ATP6V1B2,ATP6V0C,CANX,CTSS,DYNC1H1,DYNC1I2,ITGAV,ITGB1,ITGB5,LAMP1,LAMP2,RAC1,THBS2,TUBA4A,RAB7A,ATP6V0E1,ATP6V0D1,HGS,TUBB6,TUBB,CALM2,CD74,CEBPB,CTSD,HSPA9,IFNGR2,TGFB3,CYCS
9_Member	KEGG Pathway	hsa04145	Phagosome	-7.81339	-6.35011	22/154	60,71,526,527,821,1520,1778,1781,3685,3688,3693,3916,3920,5879,7058,7277,7879,8992,9114,9146,84617,203068	ACTB,ACTG1,ATP6V1B2,ATP6V0C,CANX,CTSS,DYNC1H1,DYNC1I2,ITGAV,ITGB1,ITGB5,LAMP1,LAMP2,RAC1,THBS2,TUBA4A,RAB7A,ATP6V0E1,ATP6V0D1,HGS,TUBB6,TUBB
9_Member	KEGG Pathway	hsa05152	Tuberculosis	-2.44677	-1.66783	14/179	527,805,972,1051,1509,1520,3313,3460,3916,3920,7043,7879,9114,54205	ATP6V0C,CALM2,CD74,CEBPB,CTSD,CTSS,HSPA9,IFNGR2,LAMP1,LAMP2,TGFB3,RAB7A,ATP6V0D1,CYCS
10_Summary	KEGG Pathway	hsa03050	Proteasome	-7.60699	-6.19202	12/45	5685,5689,5690,5695,5706,5707,5708,5709,5713,5719,11047,51371,960,965,3065,3066,3312,3725,4193,5434,5901,6774,7431,7529,7531,10971,26993,27044	PSMA4,PSMB1,PSMB2,PSMB7,PSMC6,PSMD1,PSMD2,PSMD3,PSMD7,PSMD13,ADRM1,POMP,CD44,CD58,HDAC1,HDAC2,HSPA8,JUN,MDM2,POLR2E,RAN,STAT3,VIM,YWHAB,YWHAE,YWHAQ,AKAP8L,SND1
10_Member	KEGG Pathway	hsa03050	Proteasome	-7.60699	-6.19202	12/45	5685,5689,5690,5695,5706,5707,5708,5709,5713,5719,11047,51371	PSMA4,PSMB1,PSMB2,PSMB7,PSMC6,PSMD1,PSMD2,PSMD3,PSMD7,PSMD13,ADRM1,POMP
10_Member	KEGG Pathway	hsa05169	Epstein-Barr virus infection	-6.2588	-4.99644	23/203	960,965,3065,3066,3312,3725,4193,5434,5706,5707,5708,5709,5713,5719,5901,6774,7431,7529,7531,10971,11047,26993,27044	CD44,CD58,HDAC1,HDAC2,HSPA8,JUN,MDM2,POLR2E,PSMC6,PSMD1,PSMD2,PSMD3,PSMD7,PSMD13,RAN,STAT3,VIM,YWHAB,YWHAE,YWHAQ,ADRM1,AKAP8L,SND1
11_Summary	KEGG Pathway	hsa05203	Viral carcinogenesis	-6.93062	-5.55911	24/201	81,468,998,1108,1642,2885,2934,3065,3066,3725,4193,5879,5922,6774,7419,7529,7531,9114,10971,23352,23513,27044,51564,90993	ACTN4,ATF4,CDC42,CHD4,DDB1,GRB2,GSN,HDAC1,HDAC2,JUN,MDM2,RAC1,RASA2,STAT3,VDAC3,YWHAB,YWHAE,ATP6V0D1,YWHAQ,UBR4,SCRIB,SND1,HDAC7,CREB3L1
11_Member	KEGG Pathway	hsa05203	Viral carcinogenesis	-6.93062	-5.55911	24/201	81,468,998,1108,1642,2885,2934,3065,3066,3725,4193,5879,5922,6774,7419,7529,7531,9114,10971,23352,23513,27044,51564,90993	ACTN4,ATF4,CDC42,CHD4,DDB1,GRB2,GSN,HDAC1,HDAC2,JUN,MDM2,RAC1,RASA2,STAT3,VDAC3,YWHAB,YWHAE,ATP6V0D1,YWHAQ,UBR4,SCRIB,SND1,HDAC7,CREB3L1
12_Summary	KEGG Pathway	hsa05412	Arrhythmogenic right ventricular cardiomyopathy (ARVC)	-6.88269	-5.53138	14/72	60,71,488,785,1495,1499,2697,3655,3685,3688,3693,3728,4000,8516,70,4634,7043,7139	ACTB,ACTG1,ATP2A2,CACNB4,CTNNA1,CTNNB1,GJA1,ITGA6,ITGAV,ITGB1,ITGB5,JUP,LMNA,ITGA8,ACTC1,MYL3,TGFB3,TNNT2
12_Member	KEGG Pathway	hsa05412	Arrhythmogenic right ventricular cardiomyopathy (ARVC)	-6.88269	-5.53138	14/72	60,71,488,785,1495,1499,2697,3655,3685,3688,3693,3728,4000,8516	ACTB,ACTG1,ATP2A2,CACNB4,CTNNA1,CTNNB1,GJA1,ITGA6,ITGAV,ITGB1,ITGB5,JUP,LMNA,ITGA8
12_Member	KEGG Pathway	hsa05410	Hypertrophic cardiomyopathy (HCM)	-6.08727	-4.8407	14/83	60,70,71,488,785,3655,3685,3688,3693,4000,4634,7043,7139,8516	ACTB,ACTC1,ACTG1,ATP2A2,CACNB4,ITGA6,ITGAV,ITGB1,ITGB5,LMNA,MYL3,TGFB3,TNNT2,ITGA8
12_Member	KEGG Pathway	hsa05414	Dilated cardiomyopathy	-5.64987	-4.43326	14/90	60,70,71,488,785,3655,3685,3688,3693,4000,4634,7043,7139,8516	ACTB,ACTC1,ACTG1,ATP2A2,CACNB4,ITGA6,ITGAV,ITGB1,ITGB5,LMNA,MYL3,TGFB3,TNNT2,ITGA8
13_Summary	KEGG Pathway	hsa04210	Apoptosis	-6.57938	-5.24738	19/138	60,71,468,1075,1508,1509,1512,1513,1520,1522,2353,3725,4000,4170,4616,5604,6709,7277,54205	ACTB,ACTG1,ATF4,CTSC,CTSB,CTSD,CTSH,CTSK,CTSS,CTSZ,FOS,JUN,LMNA,MCL1,GADD45B,MAP2K1,SPTAN1,TUBA4A,CYCS
13_Member	KEGG Pathway	hsa04210	Apoptosis	-6.57938	-5.24738	19/138	60,71,468,1075,1508,1509,1512,1513,1520,1522,2353,3725,4000,4170,4616,5604,6709,7277,54205	ACTB,ACTG1,ATF4,CTSC,CTSB,CTSD,CTSH,CTSK,CTSS,CTSZ,FOS,JUN,LMNA,MCL1,GADD45B,MAP2K1,SPTAN1,TUBA4A,CYCS
14_Summary	KEGG Pathway	hsa03013	RNA transport	-6.34926	-5.07051	21/171	1915,1974,1978,1981,1982,3646,3837,5901,6396,8087,8563,8661,8662,8664,8667,8668,9775,22794,50628,55706,91181	EEF1A1,EIF4A2,EIF4EBP1,EIF4G1,EIF4G2,EIF3E,KPNB1,RAN,SEC13,FXR1,THOC5,EIF3A,EIF3B,EIF3D,EIF3H,EIF3I,EIF4A3,CASC3,GEMIN4,NDC1,NUP210L
14_Member	KEGG Pathway	hsa03013	RNA transport	-6.34926	-5.07051	21/171	1915,1974,1978,1981,1982,3646,3837,5901,6396,8087,8563,8661,8662,8664,8667,8668,9775,22794,50628,55706,91181	EEF1A1,EIF4A2,EIF4EBP1,EIF4G1,EIF4G2,EIF3E,KPNB1,RAN,SEC13,FXR1,THOC5,EIF3A,EIF3B,EIF3D,EIF3H,EIF3I,EIF4A3,CASC3,GEMIN4,NDC1,NUP210L
15_Summary	KEGG Pathway	hsa05418	Fluid shear stress and atherosclerosis	-5.73329	-4.50196	18/142	60,71,92,805,1499,1843,2353,3162,3320,3685,3725,5879,6382,6383,6385,7184,7422,8878	ACTB,ACTG1,ACVR2A,CALM2,CTNNB1,DUSP1,FOS,HMOX1,HSP90AA1,ITGAV,JUN,RAC1,SDC1,SDC2,SDC4,HSP90B1,VEGFA,SQSTM1
15_Member	KEGG Pathway	hsa05418	Fluid shear stress and atherosclerosis	-5.73329	-4.50196	18/142	60,71,92,805,1499,1843,2353,3162,3320,3685,3725,5879,6382,6383,6385,7184,7422,8878	ACTB,ACTG1,ACVR2A,CALM2,CTNNB1,DUSP1,FOS,HMOX1,HSP90AA1,ITGAV,JUN,RAC1,SDC1,SDC2,SDC4,HSP90B1,VEGFA,SQSTM1
16_Summary	KEGG Pathway	hsa05110	Vibrio cholerae infection	-5.12	-3.93142	10/51	60,71,526,527,8992,9114,9601,11014,11015,30001,998,3725,5879,28964,1513,2353,7043,7422	ACTB,ACTG1,ATP6V1B2,ATP6V0C,ATP6V0E1,ATP6V0D1,PDIA4,KDELR2,KDELR3,ERO1A,CDC42,JUN,RAC1,GIT1,CTSK,FOS,TGFB3,VEGFA
16_Member	KEGG Pathway	hsa05110	Vibrio cholerae infection	-5.12	-3.93142	10/51	60,71,526,527,8992,9114,9601,11014,11015,30001	ACTB,ACTG1,ATP6V1B2,ATP6V0C,ATP6V0E1,ATP6V0D1,PDIA4,KDELR2,KDELR3,ERO1A
16_Member	KEGG Pathway	hsa05120	Epithelial cell signaling in Helicobacter pylori infection	-2.65421	-1.84697	8/68	526,527,998,3725,5879,8992,9114,28964	ATP6V1B2,ATP6V0C,CDC42,JUN,RAC1,ATP6V0E1,ATP6V0D1,GIT1
16_Member	KEGG Pathway	hsa05323	Rheumatoid arthritis	-2.42994	-1.66714	9/90	526,527,1513,2353,3725,7043,7422,8992,9114	ATP6V1B2,ATP6V0C,CTSK,FOS,JUN,TGFB3,VEGFA,ATP6V0E1,ATP6V0D1
17_Summary	KEGG Pathway	hsa05161	Hepatitis B	-5.02863	-3.85342	17/144	468,1642,2353,2885,3339,3725,4089,5604,6774,6775,6778,7043,7419,7529,10971,54205,90993,405,998,2889,5879,6513,7422,1277,1278,1284,1958,2335,25,396,397,805,6464,7531,1499,10928	ATF4,DDB1,FOS,GRB2,HSPG2,JUN,SMAD4,MAP2K1,STAT3,STAT4,STAT6,TGFB3,VDAC3,YWHAB,YWHAQ,CYCS,CREB3L1,ARNT,CDC42,RAPGEF1,RAC1,SLC2A1,VEGFA,COL1A1,COL1A2,COL4A2,EGR1,FN1,ABL1,ARHGDIA,ARHGDIB,CALM2,SHC1,YWHAE,CTNNB1,RALBP1
17_Member	KEGG Pathway	hsa05161	Hepatitis B	-5.02863	-3.85342	17/144	468,1642,2353,2885,3339,3725,4089,5604,6774,6775,6778,7043,7419,7529,10971,54205,90993	ATF4,DDB1,FOS,GRB2,HSPG2,JUN,SMAD4,MAP2K1,STAT3,STAT4,STAT6,TGFB3,VDAC3,YWHAB,YWHAQ,CYCS,CREB3L1
17_Member	KEGG Pathway	hsa05211	Renal cell carcinoma	-4.16143	-3.14894	10/65	405,998,2885,2889,3725,5604,5879,6513,7043,7422	ARNT,CDC42,GRB2,RAPGEF1,JUN,MAP2K1,RAC1,SLC2A1,TGFB3,VEGFA
17_Member	KEGG Pathway	hsa04933	AGE-RAGE signaling pathway in diabetic complications	-3.83522	-2.86385	12/99	998,1277,1278,1284,1958,2335,3725,4089,5879,6774,7043,7422	CDC42,COL1A1,COL1A2,COL4A2,EGR1,FN1,JUN,SMAD4,RAC1,STAT3,TGFB3,VEGFA
17_Member	KEGG Pathway	hsa04722	Neurotrophin signaling pathway	-3.64546	-2.69992	13/119	25,396,397,468,805,998,2885,2889,3725,5604,5879,6464,7531	ABL1,ARHGDIA,ARHGDIB,ATF4,CALM2,CDC42,GRB2,RAPGEF1,JUN,MAP2K1,RAC1,SHC1,YWHAE
17_Member	KEGG Pathway	hsa05210	Colorectal cancer	-3.01093	-2.12339	8/60	1499,2353,3725,4089,5604,5879,7043,54205	CTNNB1,FOS,JUN,SMAD4,MAP2K1,RAC1,TGFB3,CYCS
17_Member	KEGG Pathway	hsa05212	Pancreatic cancer	-2.82498	-1.98741	8/64	998,4089,5604,5879,6774,7043,7422,10928	CDC42,SMAD4,MAP2K1,RAC1,STAT3,TGFB3,VEGFA,RALBP1
18_Summary	KEGG Pathway	M00085	Fatty acid biosynthesis, elongation, mitochondria	-4.71067	-3.58515	4/6	3030,3032,3033,10449,33,223,6319	HADHA,HADHB,HADH,ACAA2,ACADL,ALDH9A1,SCD
18_Member	KEGG Pathway	M00085	Fatty acid biosynthesis, elongation, mitochondria	-4.71067	-3.58515	4/6	3030,3032,3033,10449	HADHA,HADHB,HADH,ACAA2
18_Member	KEGG Pathway	hsa_M00085	Fatty acid biosynthesis, elongation, mitochondria	-4.71067	-3.58515	4/6	3030,3032,3033,10449	HADHA,HADHB,HADH,ACAA2
18_Member	KEGG Pathway	M00087	beta-Oxidation	-4.51834	-3.44787	5/12	33,3030,3032,3033,10449	ACADL,HADHA,HADHB,HADH,ACAA2
18_Member	KEGG Pathway	hsa_M00087	beta-Oxidation	-4.51834	-3.44787	5/12	33,3030,3032,3033,10449	ACADL,HADHA,HADHB,HADH,ACAA2
18_Member	KEGG Pathway	hsa00071	Fatty acid degradation	-2.4313	-1.66714	6/44	33,223,3030,3032,3033,10449	ACADL,ALDH9A1,HADHA,HADHB,HADH,ACAA2
18_Member	KEGG Pathway	hsa01212	Fatty acid metabolism	-2.24122	-1.52977	6/48	33,3030,3032,3033,6319,10449	ACADL,HADHA,HADHB,HADH,SCD,ACAA2
18_Member	KEGG Pathway	hsa00062	Fatty acid elongation	-2.01005	-1.35069	4/25	3030,3032,3033,10449	HADHA,HADHB,HADH,ACAA2
19_Summary	KEGG Pathway	hsa04910	Insulin signaling pathway	-4.67026	-3.55632	16/138	805,868,1978,2319,2885,2889,3098,3099,5499,5500,5573,5604,5836,6198,6464,9021,3728,5914,6774,1499,1855,2247,2353,3725,4851,4853,8322,7422,4193,5879,8394,57153,25	CALM2,CBLB,EIF4EBP1,FLOT2,GRB2,RAPGEF1,HK1,HK2,PPP1CA,PPP1CB,PRKAR1A,MAP2K1,PYGL,RPS6KB1,SHC1,SOCS3,JUP,RARA,STAT3,CTNNB1,DVL1,FGF2,FOS,JUN,NOTCH1,NOTCH2,FZD4,VEGFA,MDM2,RAC1,PIP5K1A,SLC44A2,ABL1
19_Member	KEGG Pathway	hsa04910	Insulin signaling pathway	-4.67026	-3.55632	16/138	805,868,1978,2319,2885,2889,3098,3099,5499,5500,5573,5604,5836,6198,6464,9021	CALM2,CBLB,EIF4EBP1,FLOT2,GRB2,RAPGEF1,HK1,HK2,PPP1CA,PPP1CB,PRKAR1A,MAP2K1,PYGL,RPS6KB1,SHC1,SOCS3
19_Member	KEGG Pathway	hsa05221	Acute myeloid leukemia	-2.58002	-1.78938	7/55	1978,2885,3728,5604,5914,6198,6774	EIF4EBP1,GRB2,JUP,MAP2K1,RARA,RPS6KB1,STAT3
19_Member	KEGG Pathway	hsa05224	Breast cancer	-2.39101	-1.65175	12/144	1499,1855,2247,2353,2885,3725,4851,4853,5604,6198,6464,8322	CTNNB1,DVL1,FGF2,FOS,GRB2,JUN,NOTCH1,NOTCH2,MAP2K1,RPS6KB1,SHC1,FZD4
19_Member	KEGG Pathway	hsa01521	EGFR tyrosine kinase inhibitor resistance	-2.24886	-1.52977	8/79	1978,2247,2885,5604,6198,6464,6774,7422	EIF4EBP1,FGF2,GRB2,MAP2K1,RPS6KB1,SHC1,STAT3,VEGFA
19_Member	KEGG Pathway	hsa01522	Endocrine resistance	-2.24448	-1.52977	9/96	2353,2885,3725,4193,4851,4853,5604,6198,6464	FOS,GRB2,JUN,MDM2,NOTCH1,NOTCH2,MAP2K1,RPS6KB1,SHC1
19_Member	KEGG Pathway	hsa05231	Choline metabolism in cancer	-2.15807	-1.47294	9/99	1978,2353,2885,3725,5604,5879,6198,8394,57153	EIF4EBP1,FOS,GRB2,JUN,MAP2K1,RAC1,RPS6KB1,PIP5K1A,SLC44A2
19_Member	KEGG Pathway	hsa04012	ErbB signaling pathway	-2.03069	-1.36634	8/86	25,868,1978,2885,3725,5604,6198,6464	ABL1,CBLB,EIF4EBP1,GRB2,JUN,MAP2K1,RPS6KB1,SHC1
20_Summary	KEGG Pathway	hsa04390	Hippo signaling pathway	-4.64256	-3.5399	17/154	60,71,1490,1495,1499,1855,4089,5499,5500,6591,7043,7529,7531,8322,8994,10971,23513	ACTB,ACTG1,CCN2,CTNNA1,CTNNB1,DVL1,SMAD4,PPP1CA,PPP1CB,SNAI2,TGFB3,YWHAB,YWHAE,FZD4,LIMD1,YWHAQ,SCRIB
20_Member	KEGG Pathway	hsa04390	Hippo signaling pathway	-4.64256	-3.5399	17/154	60,71,1490,1495,1499,1855,4089,5499,5500,6591,7043,7529,7531,8322,8994,10971,23513	ACTB,ACTG1,CCN2,CTNNA1,CTNNB1,DVL1,SMAD4,PPP1CA,PPP1CB,SNAI2,TGFB3,YWHAB,YWHAE,FZD4,LIMD1,YWHAQ,SCRIB
